# Supplementary material
Source: Royal Society of Chemistry journal article supplement (doi:10.1039/d6nj00004e)

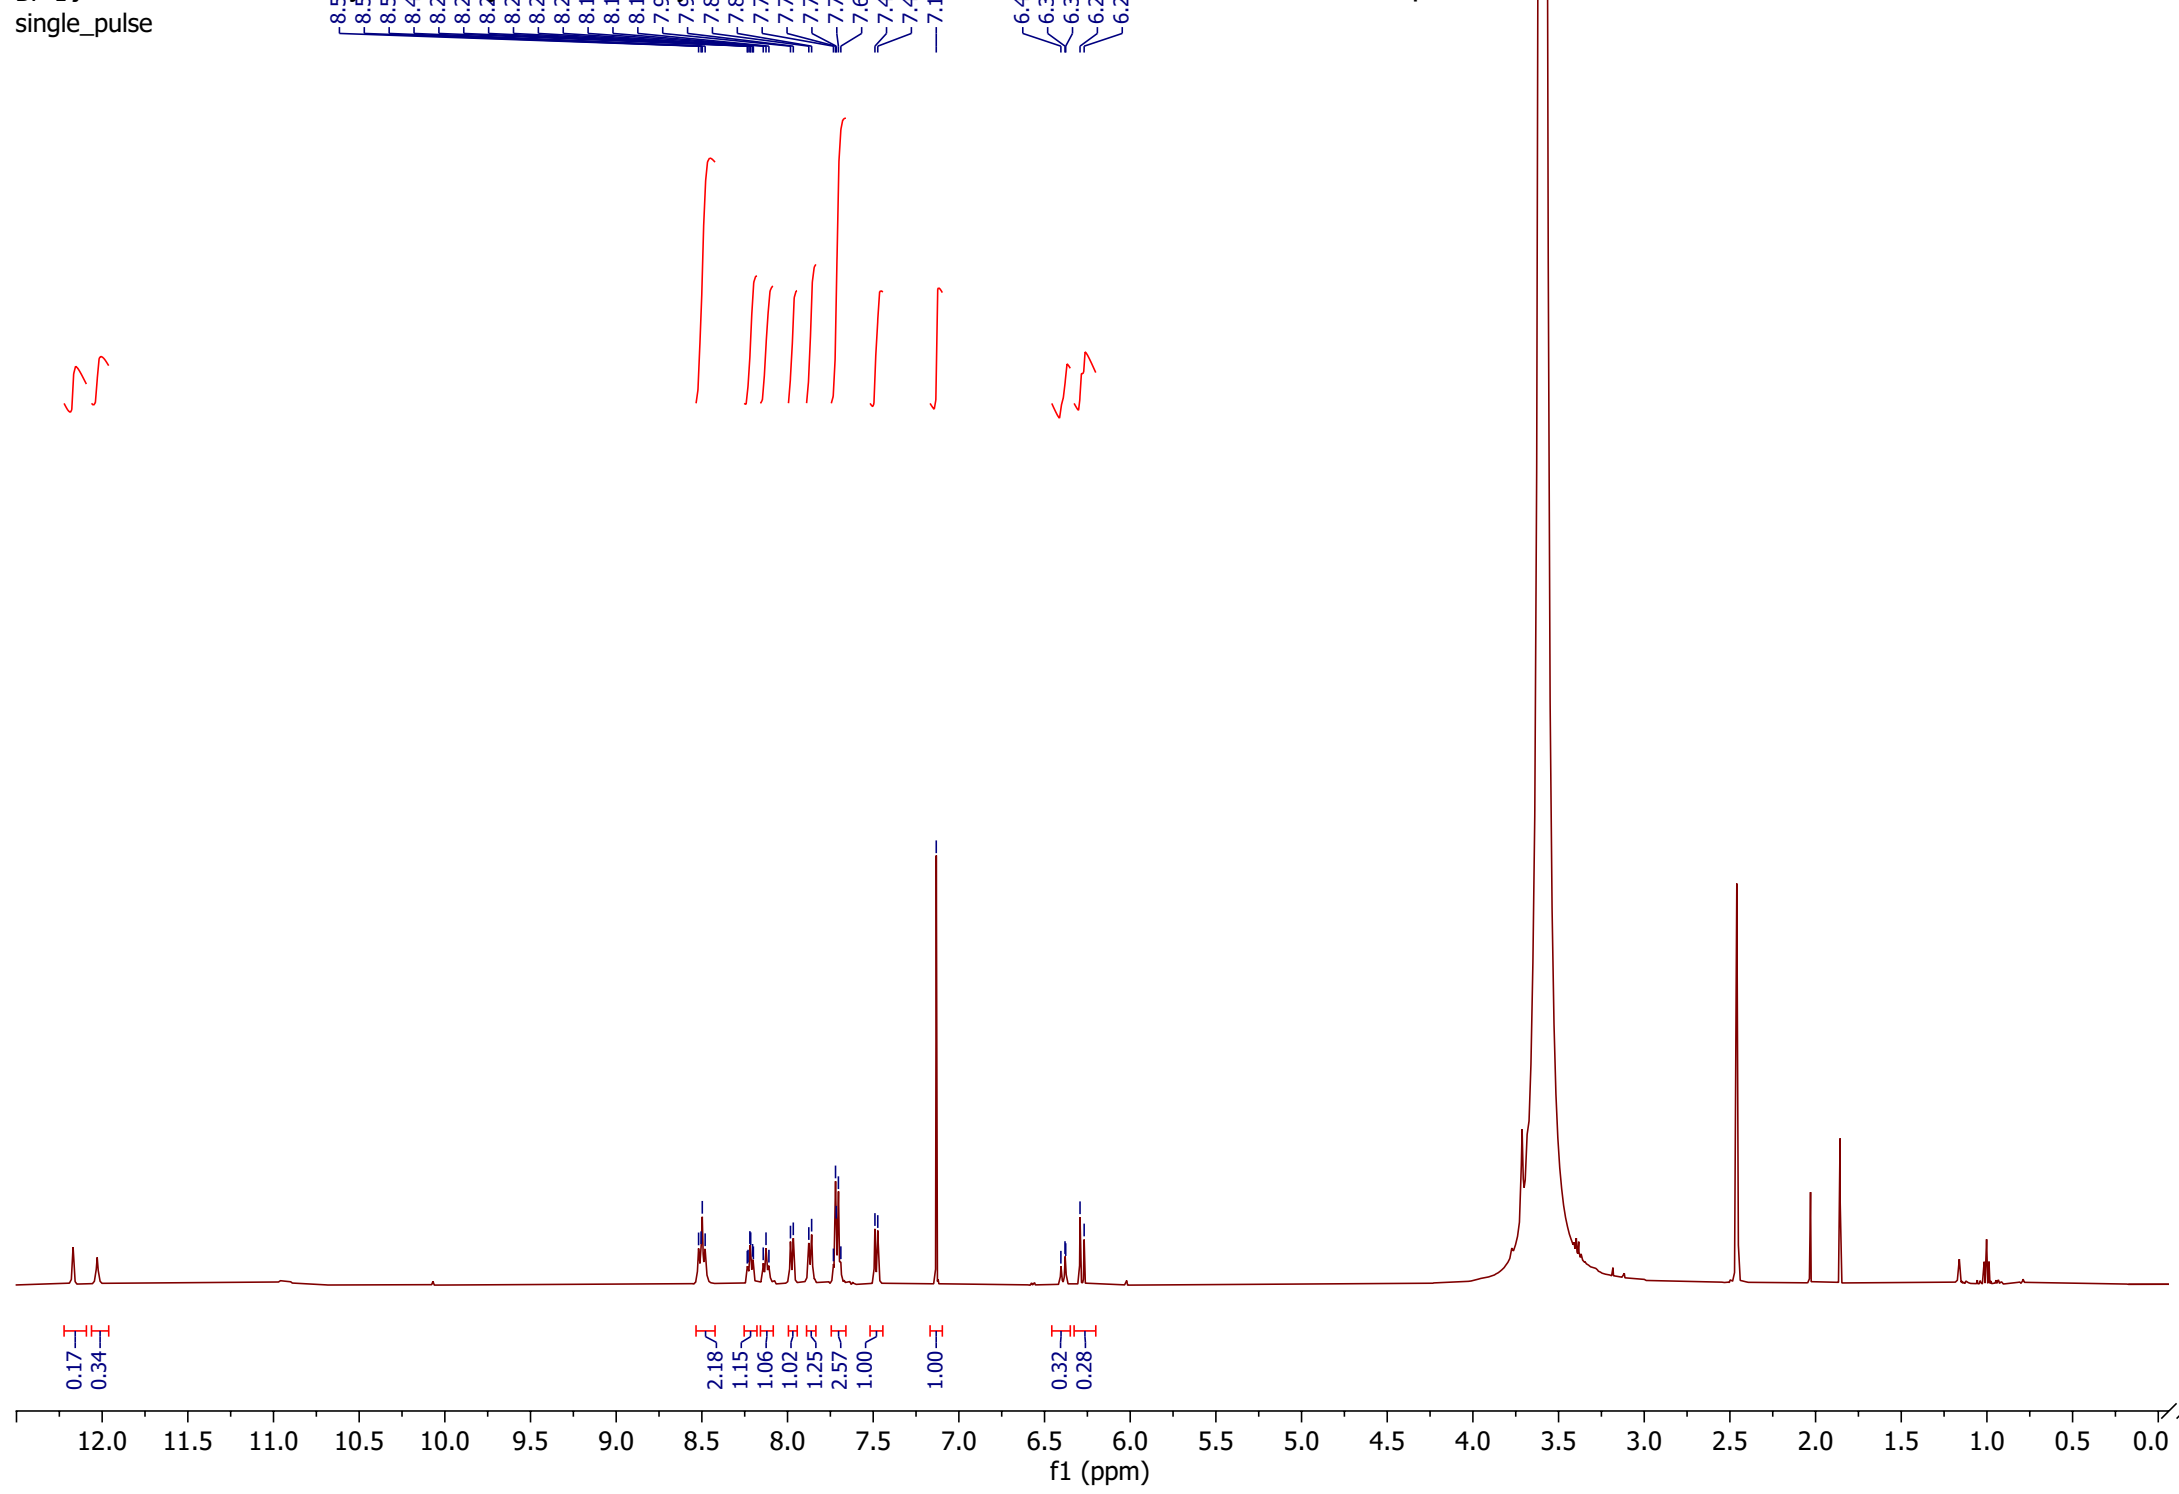

BF-2  
single\_pulse

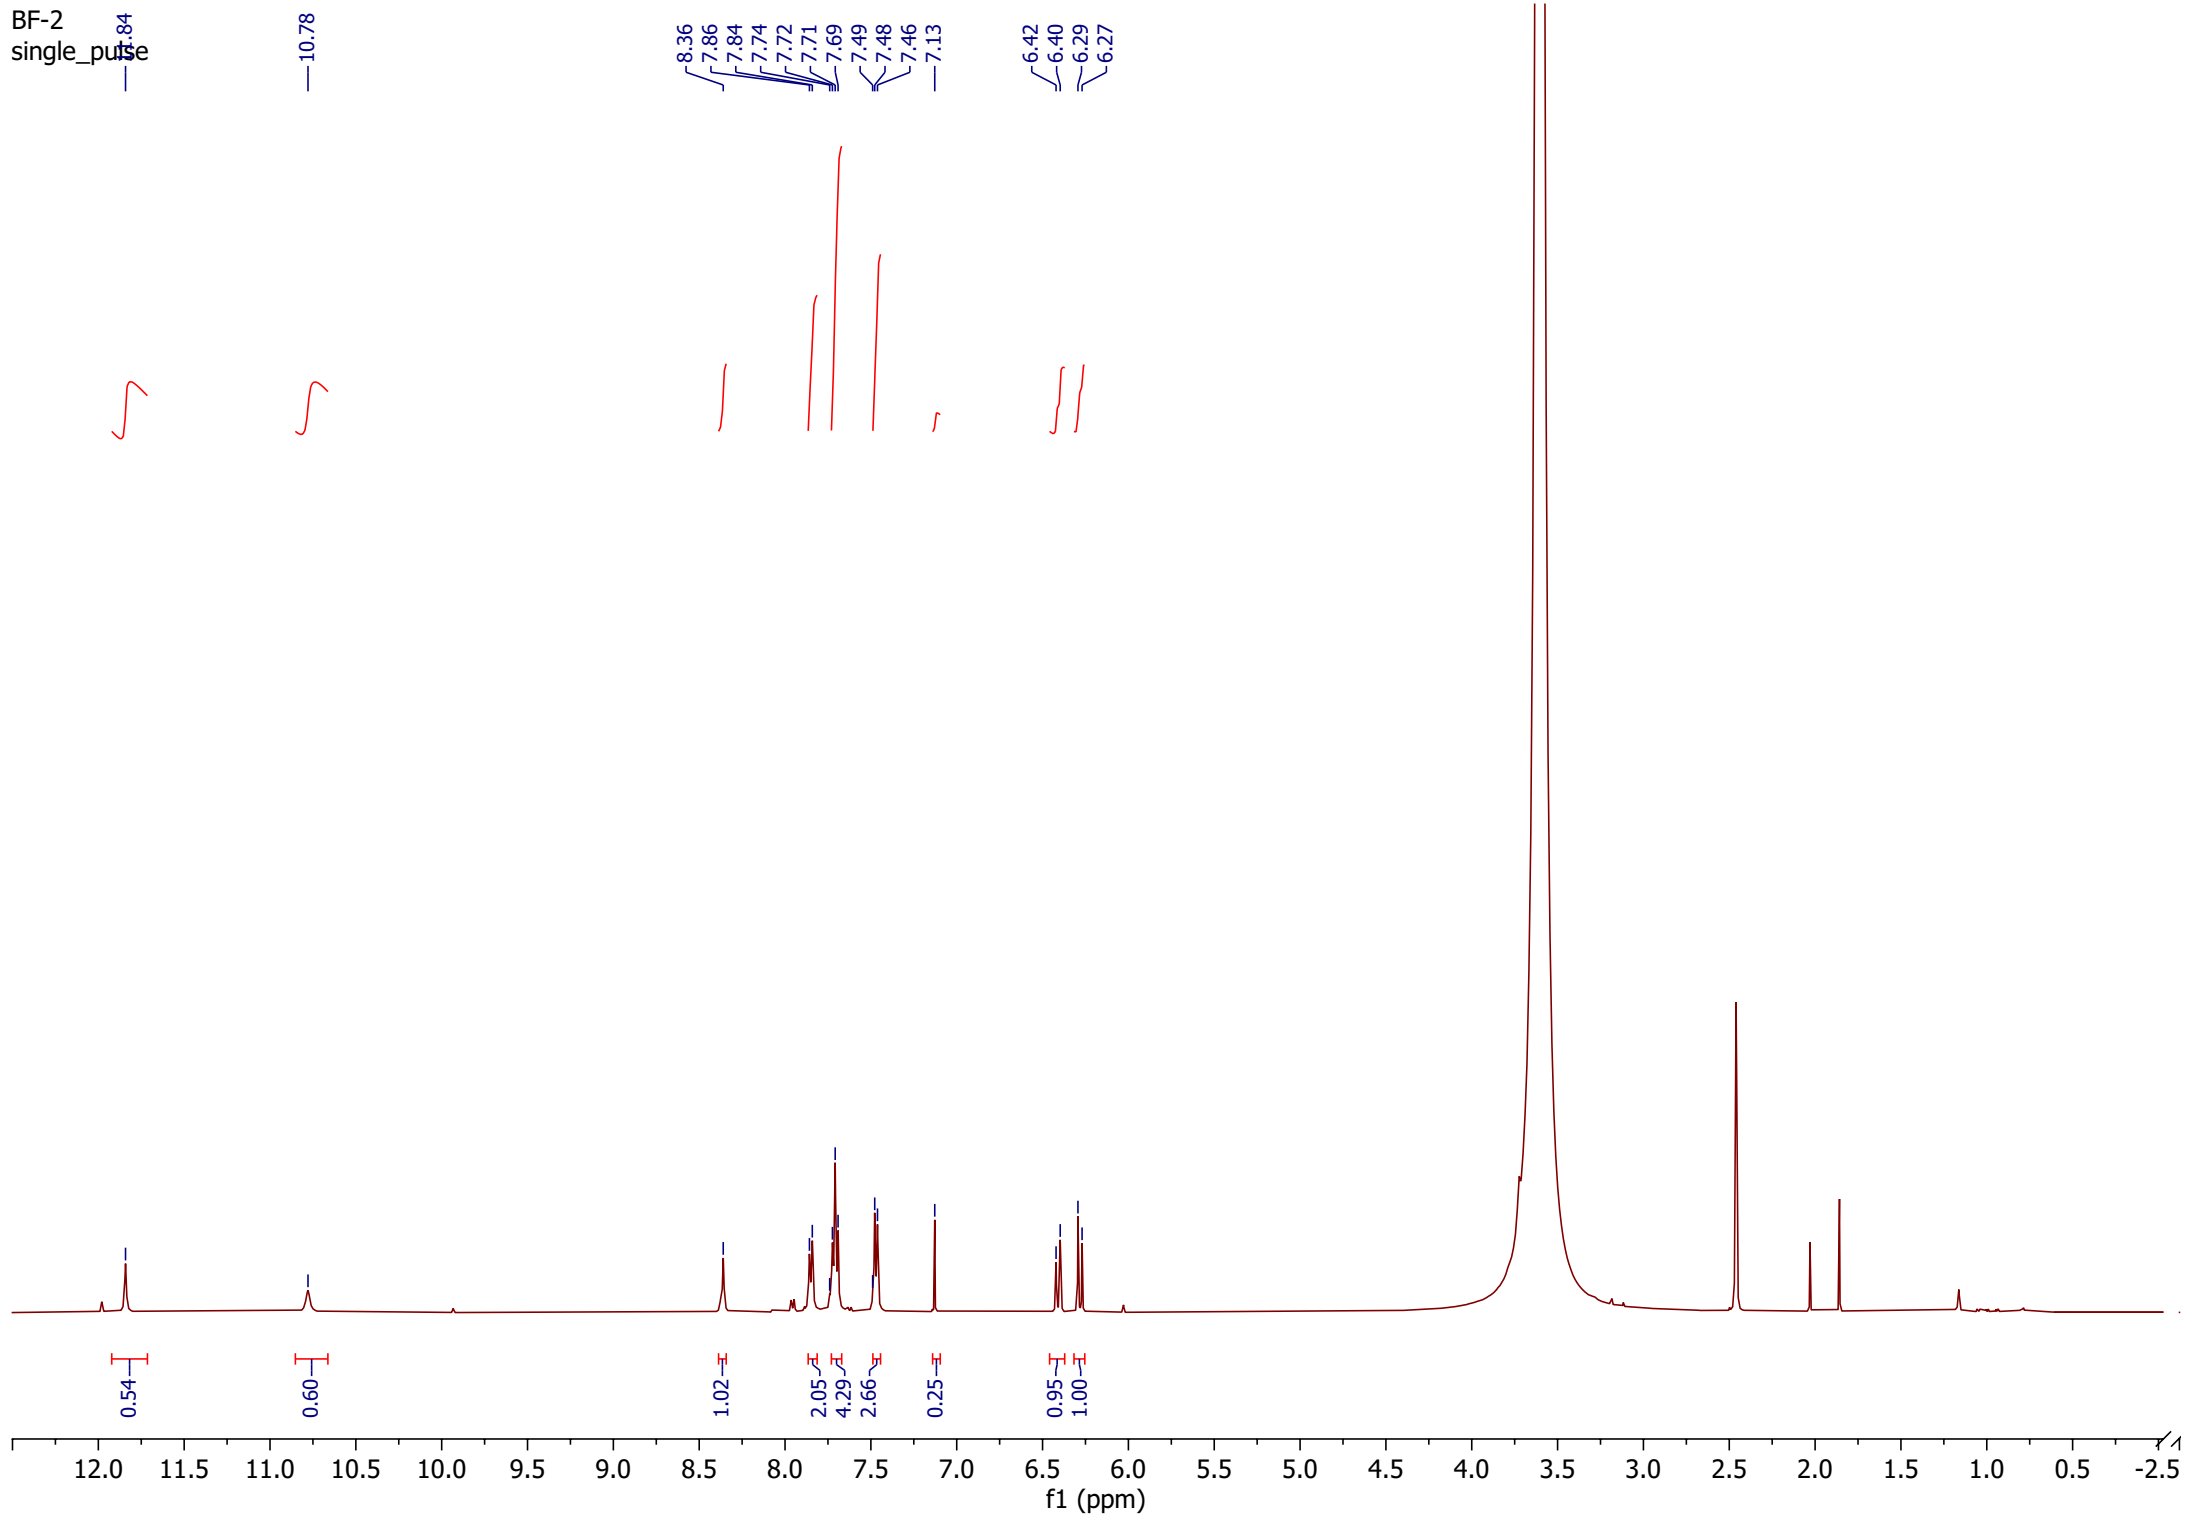

BF-3  
single\_pulse

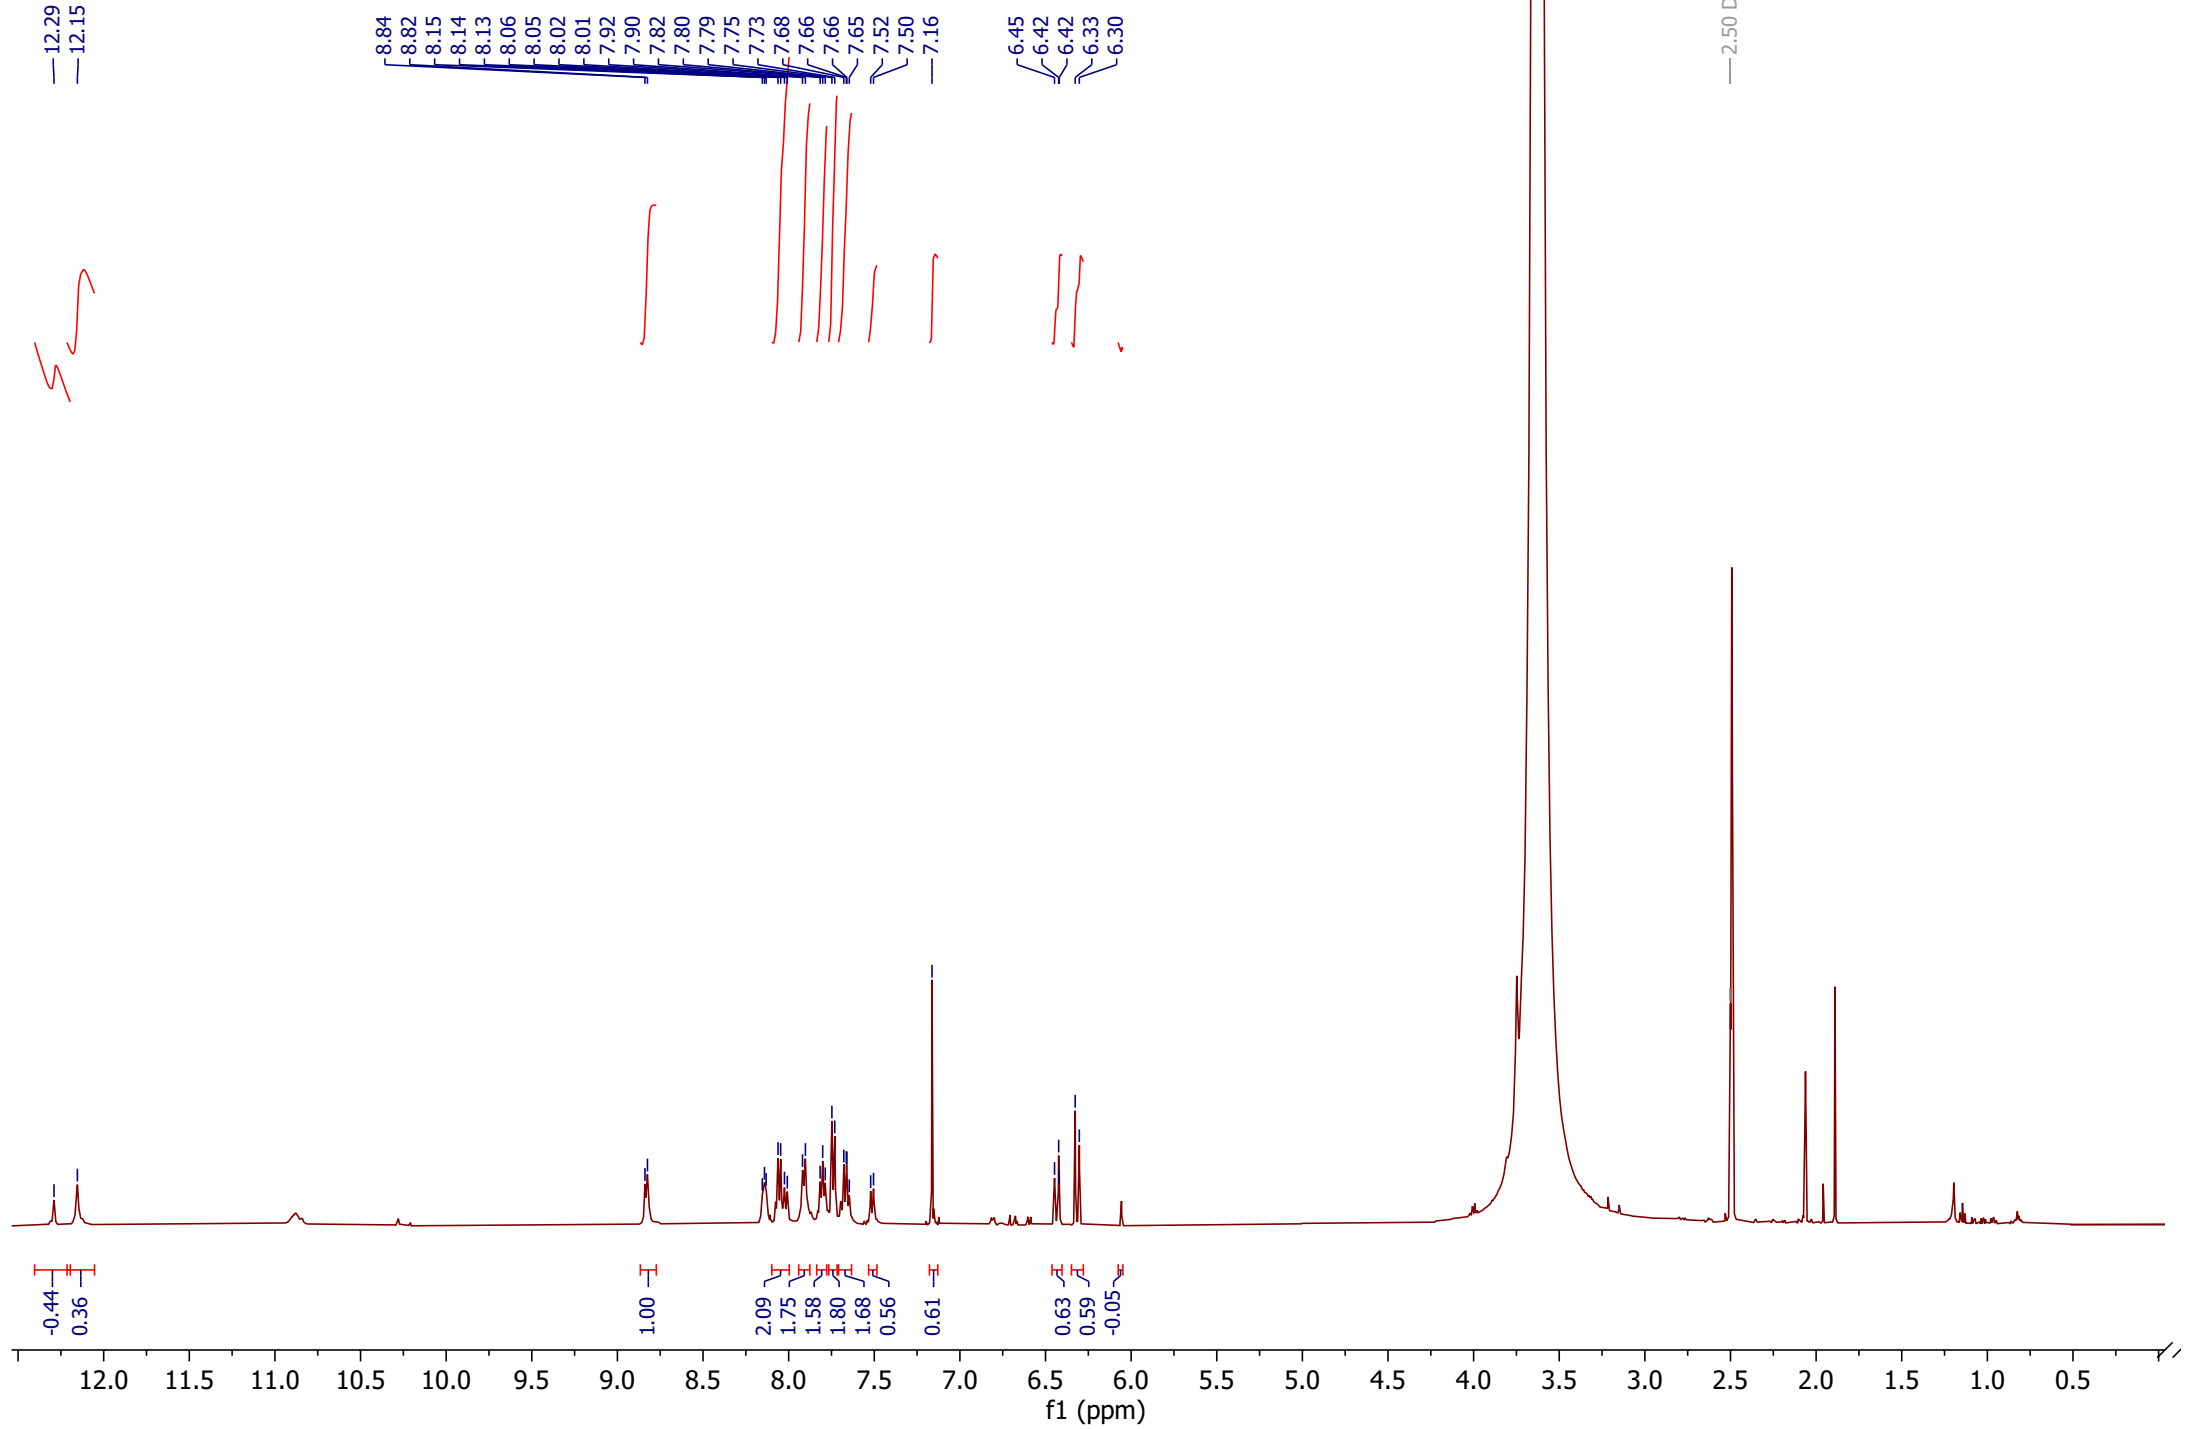

BF-5  
single\_pulse

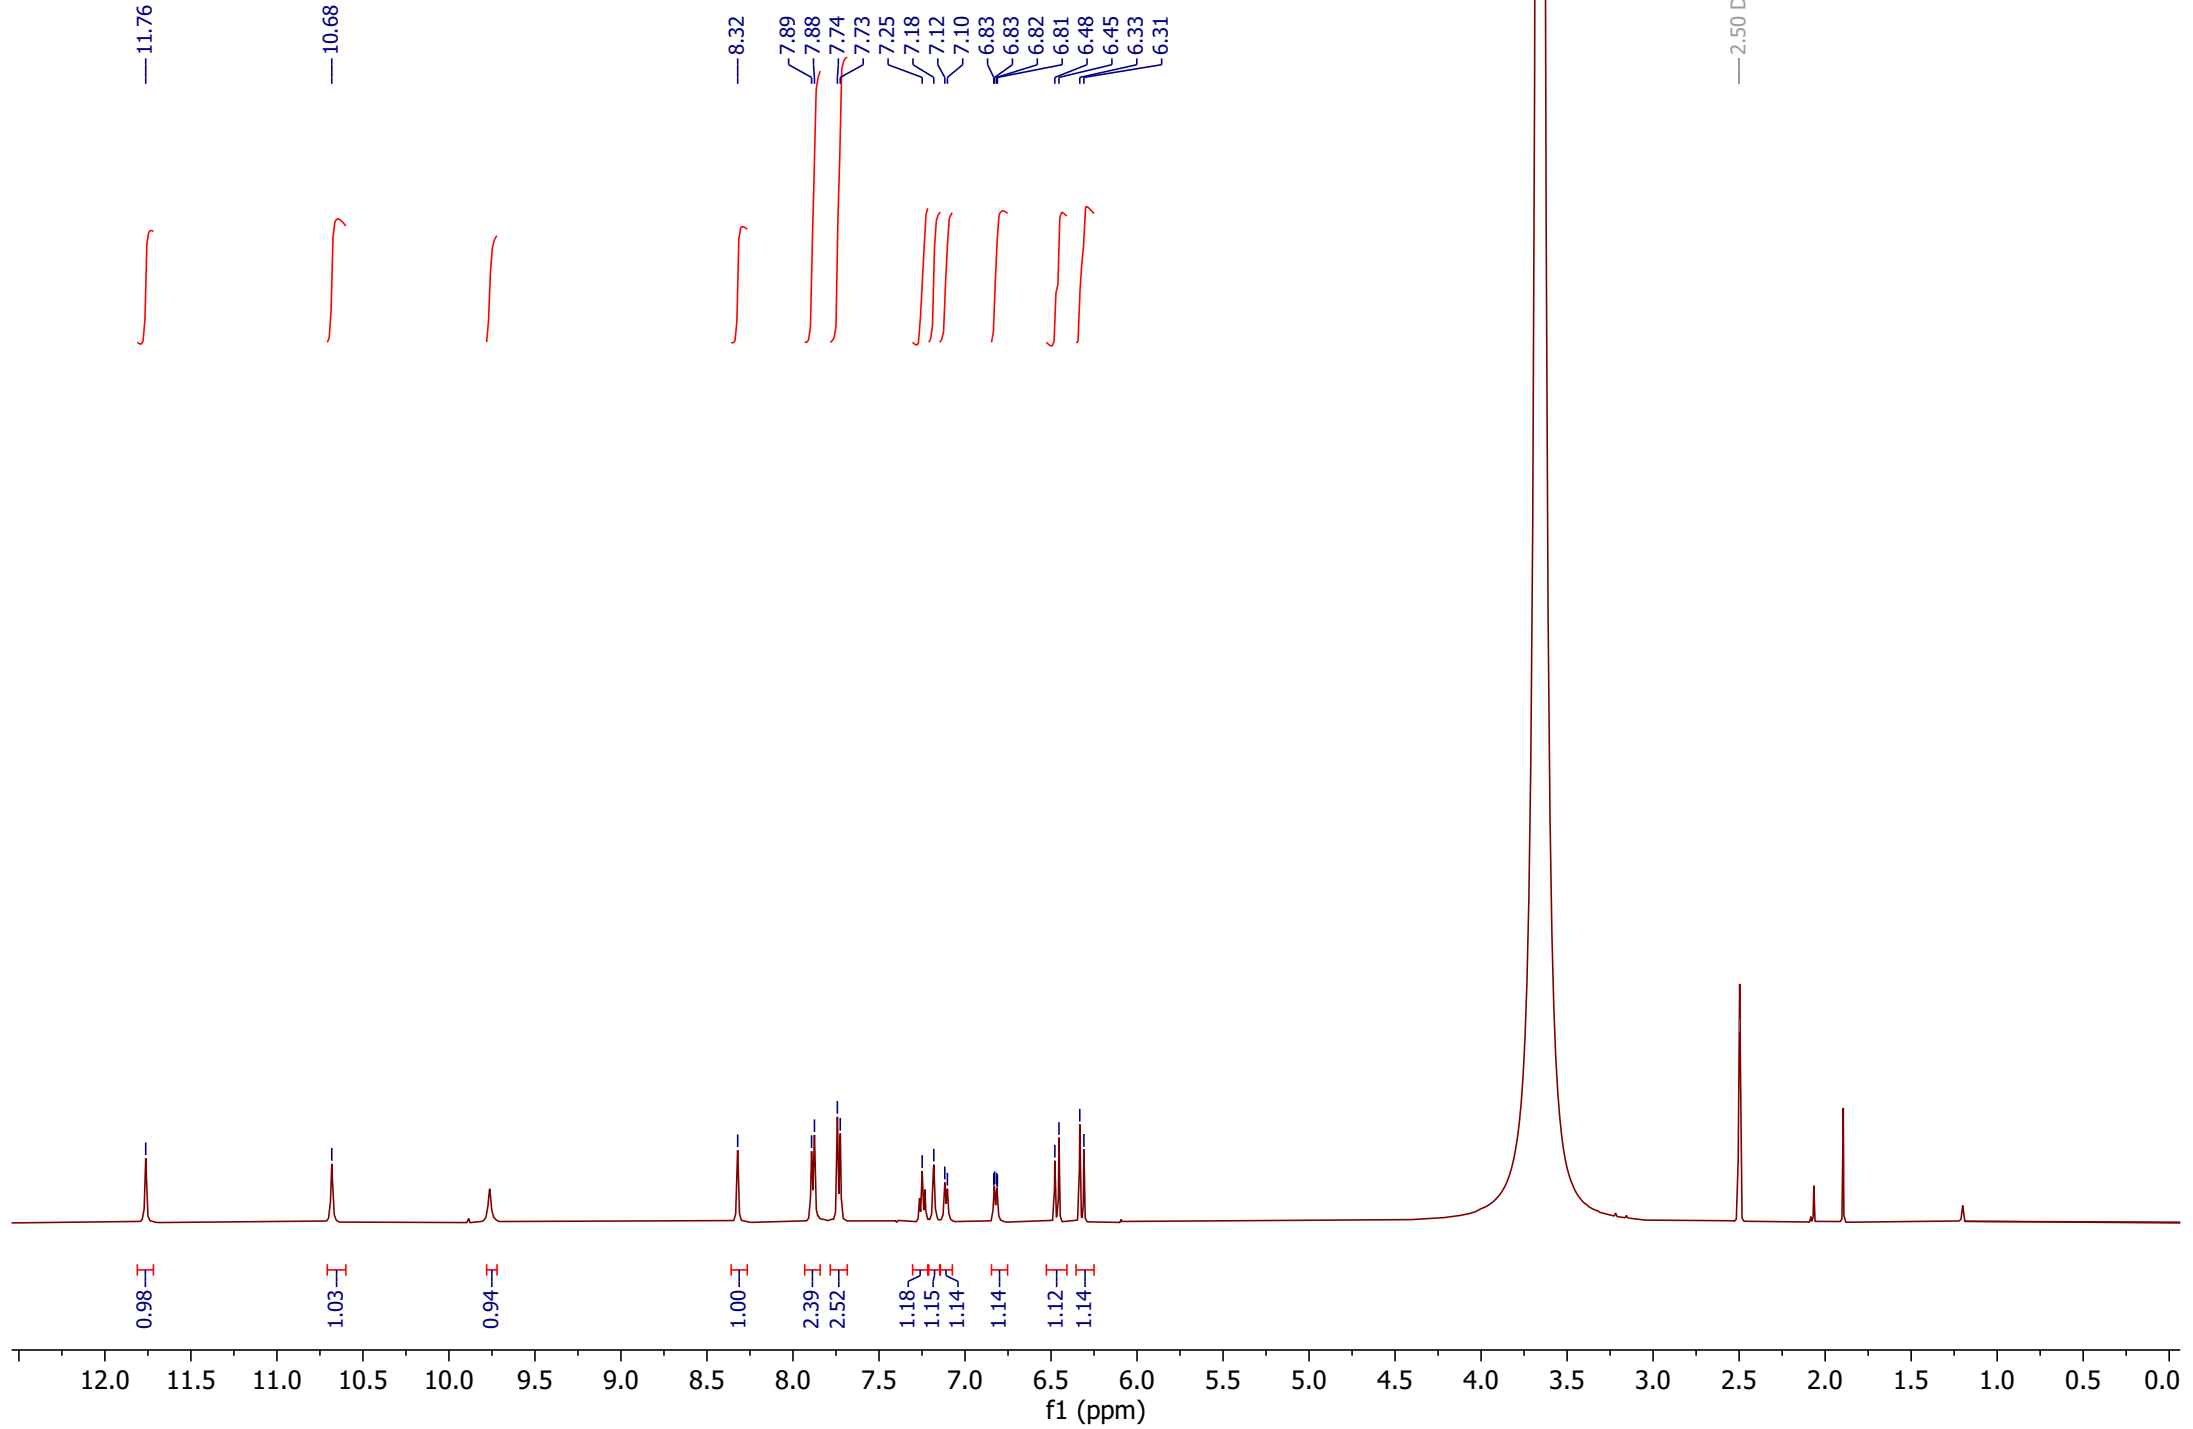

BF-6  
single\_pulse

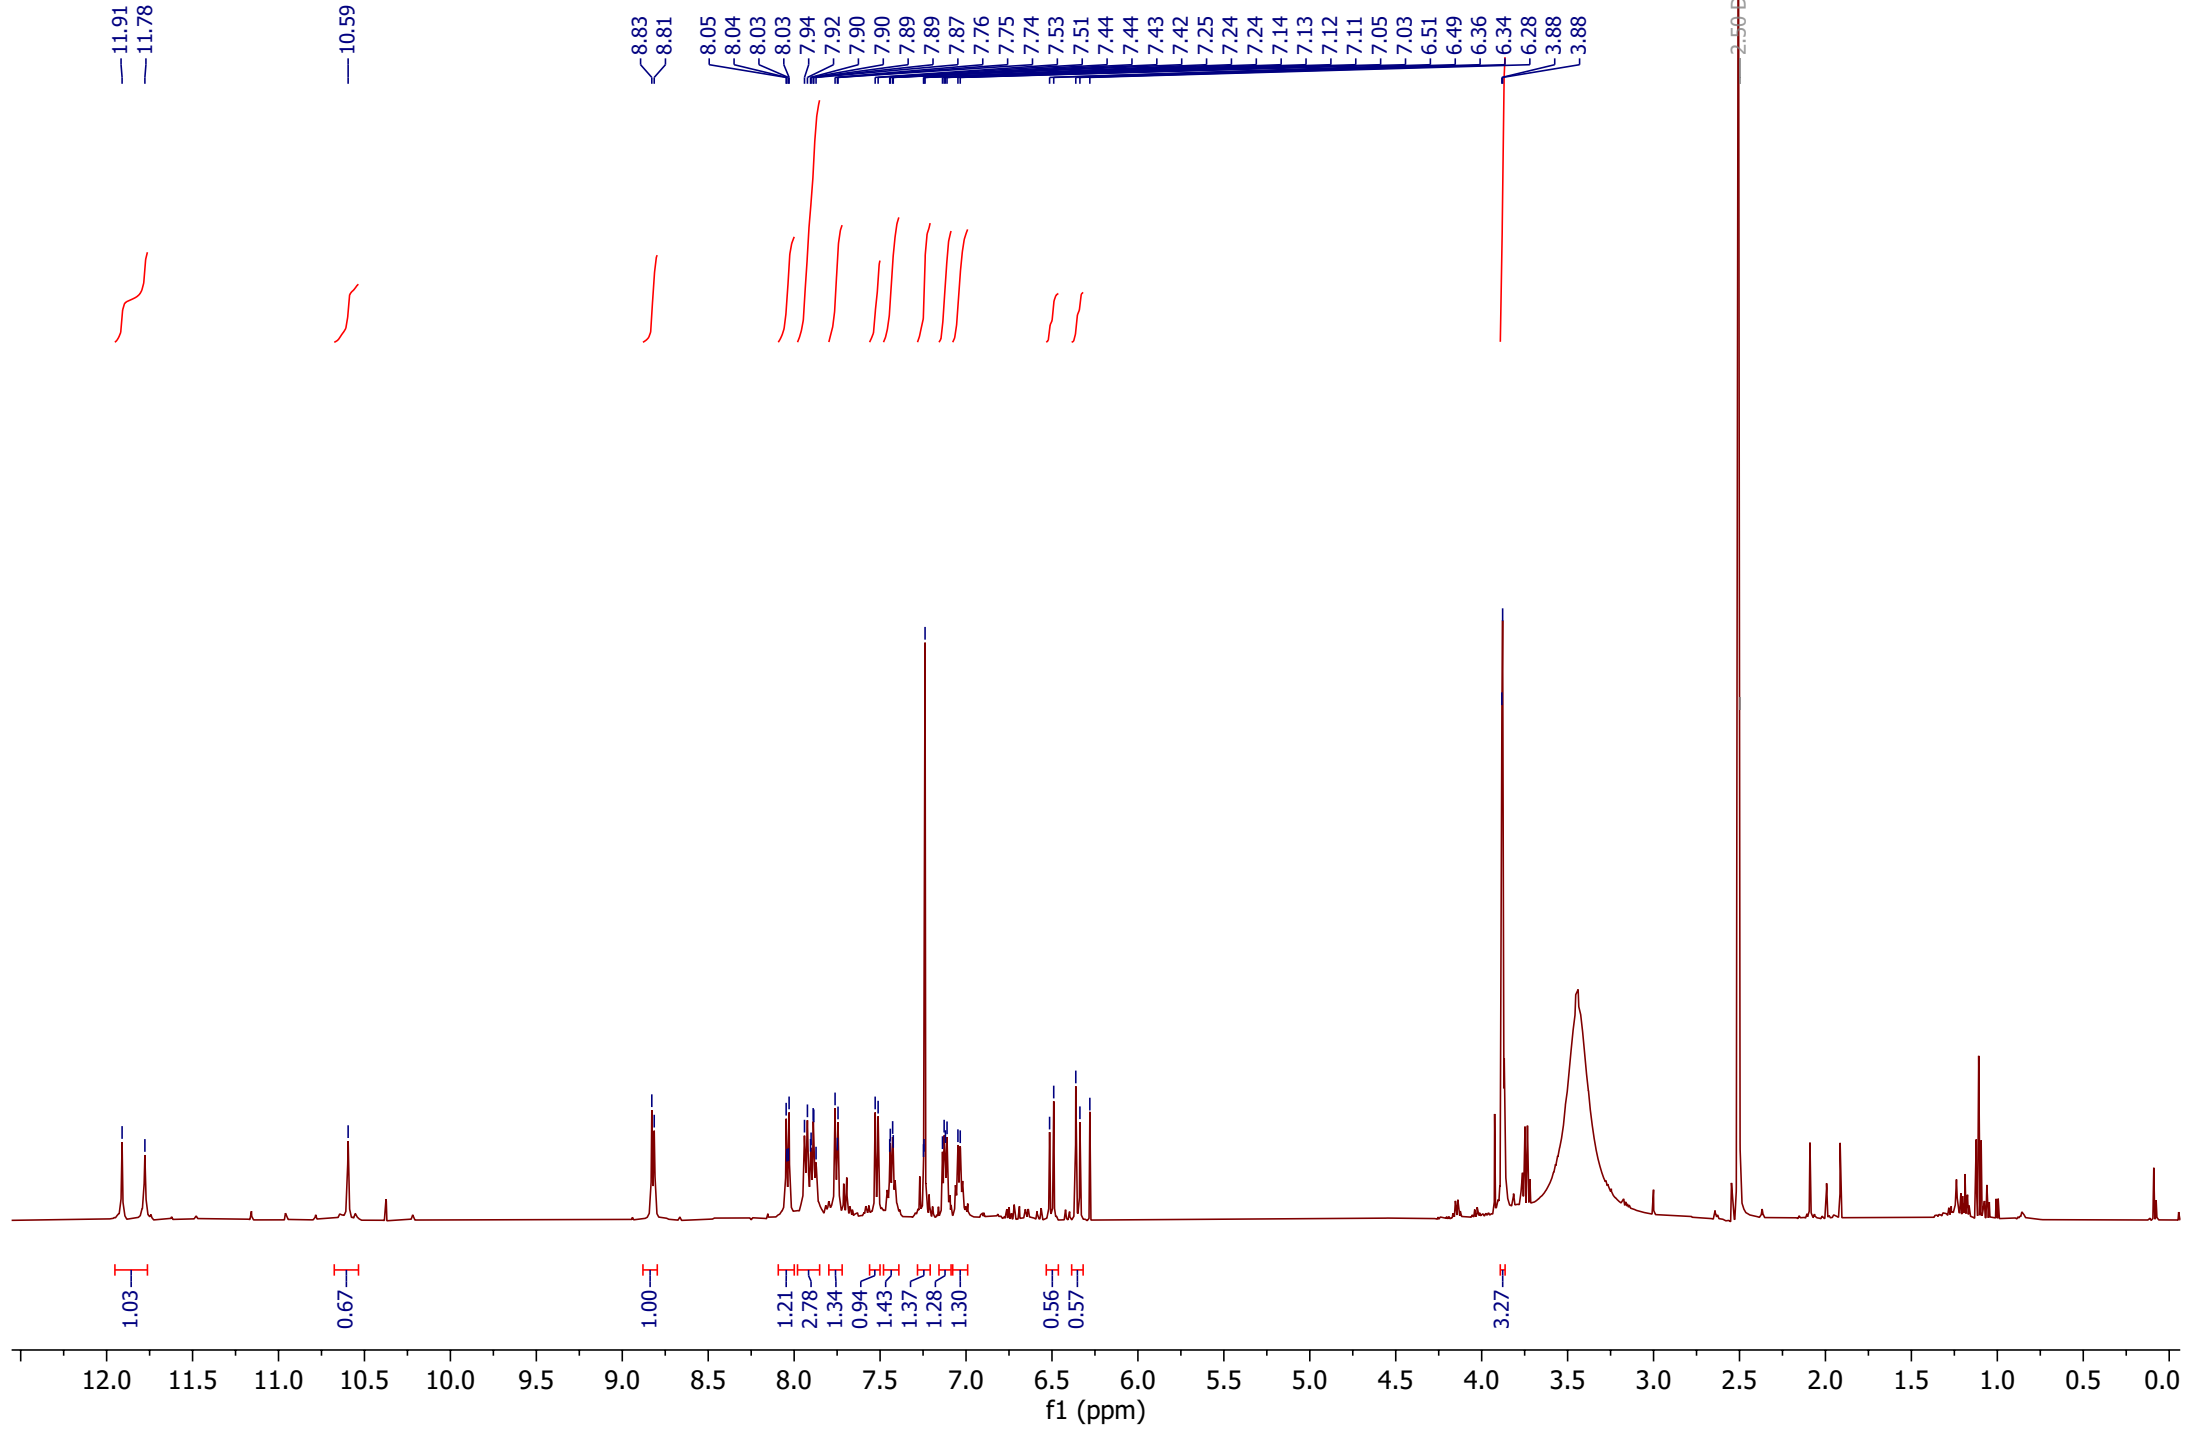

BF-7  
single\_pulse

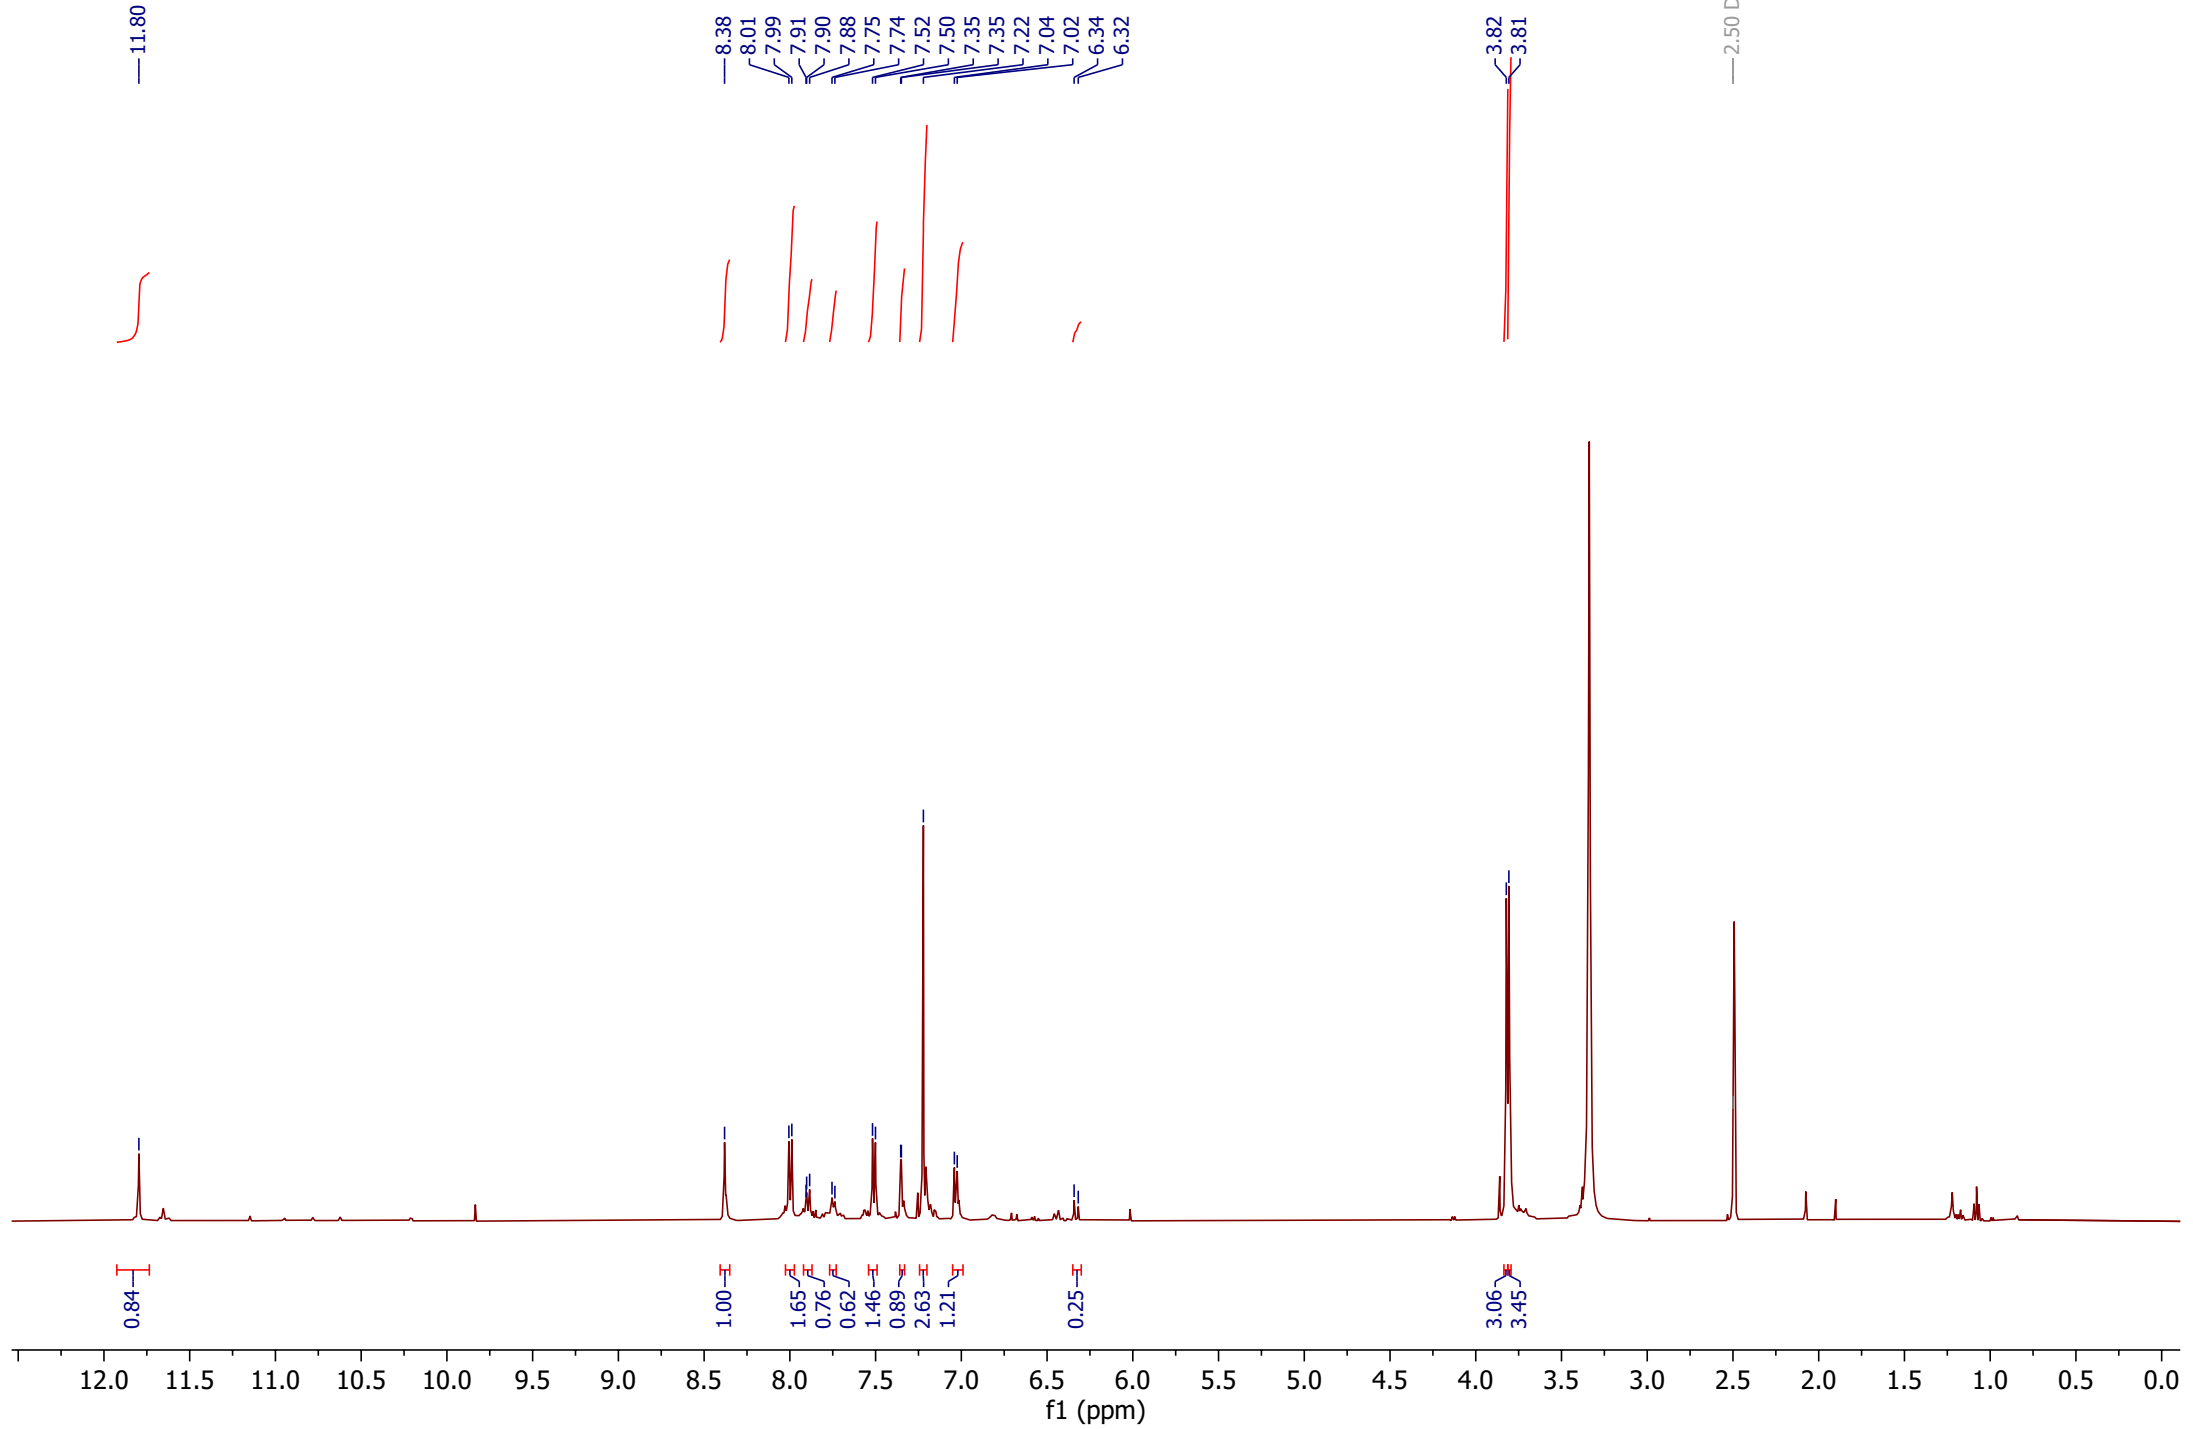

BF-8  
single\_pulse

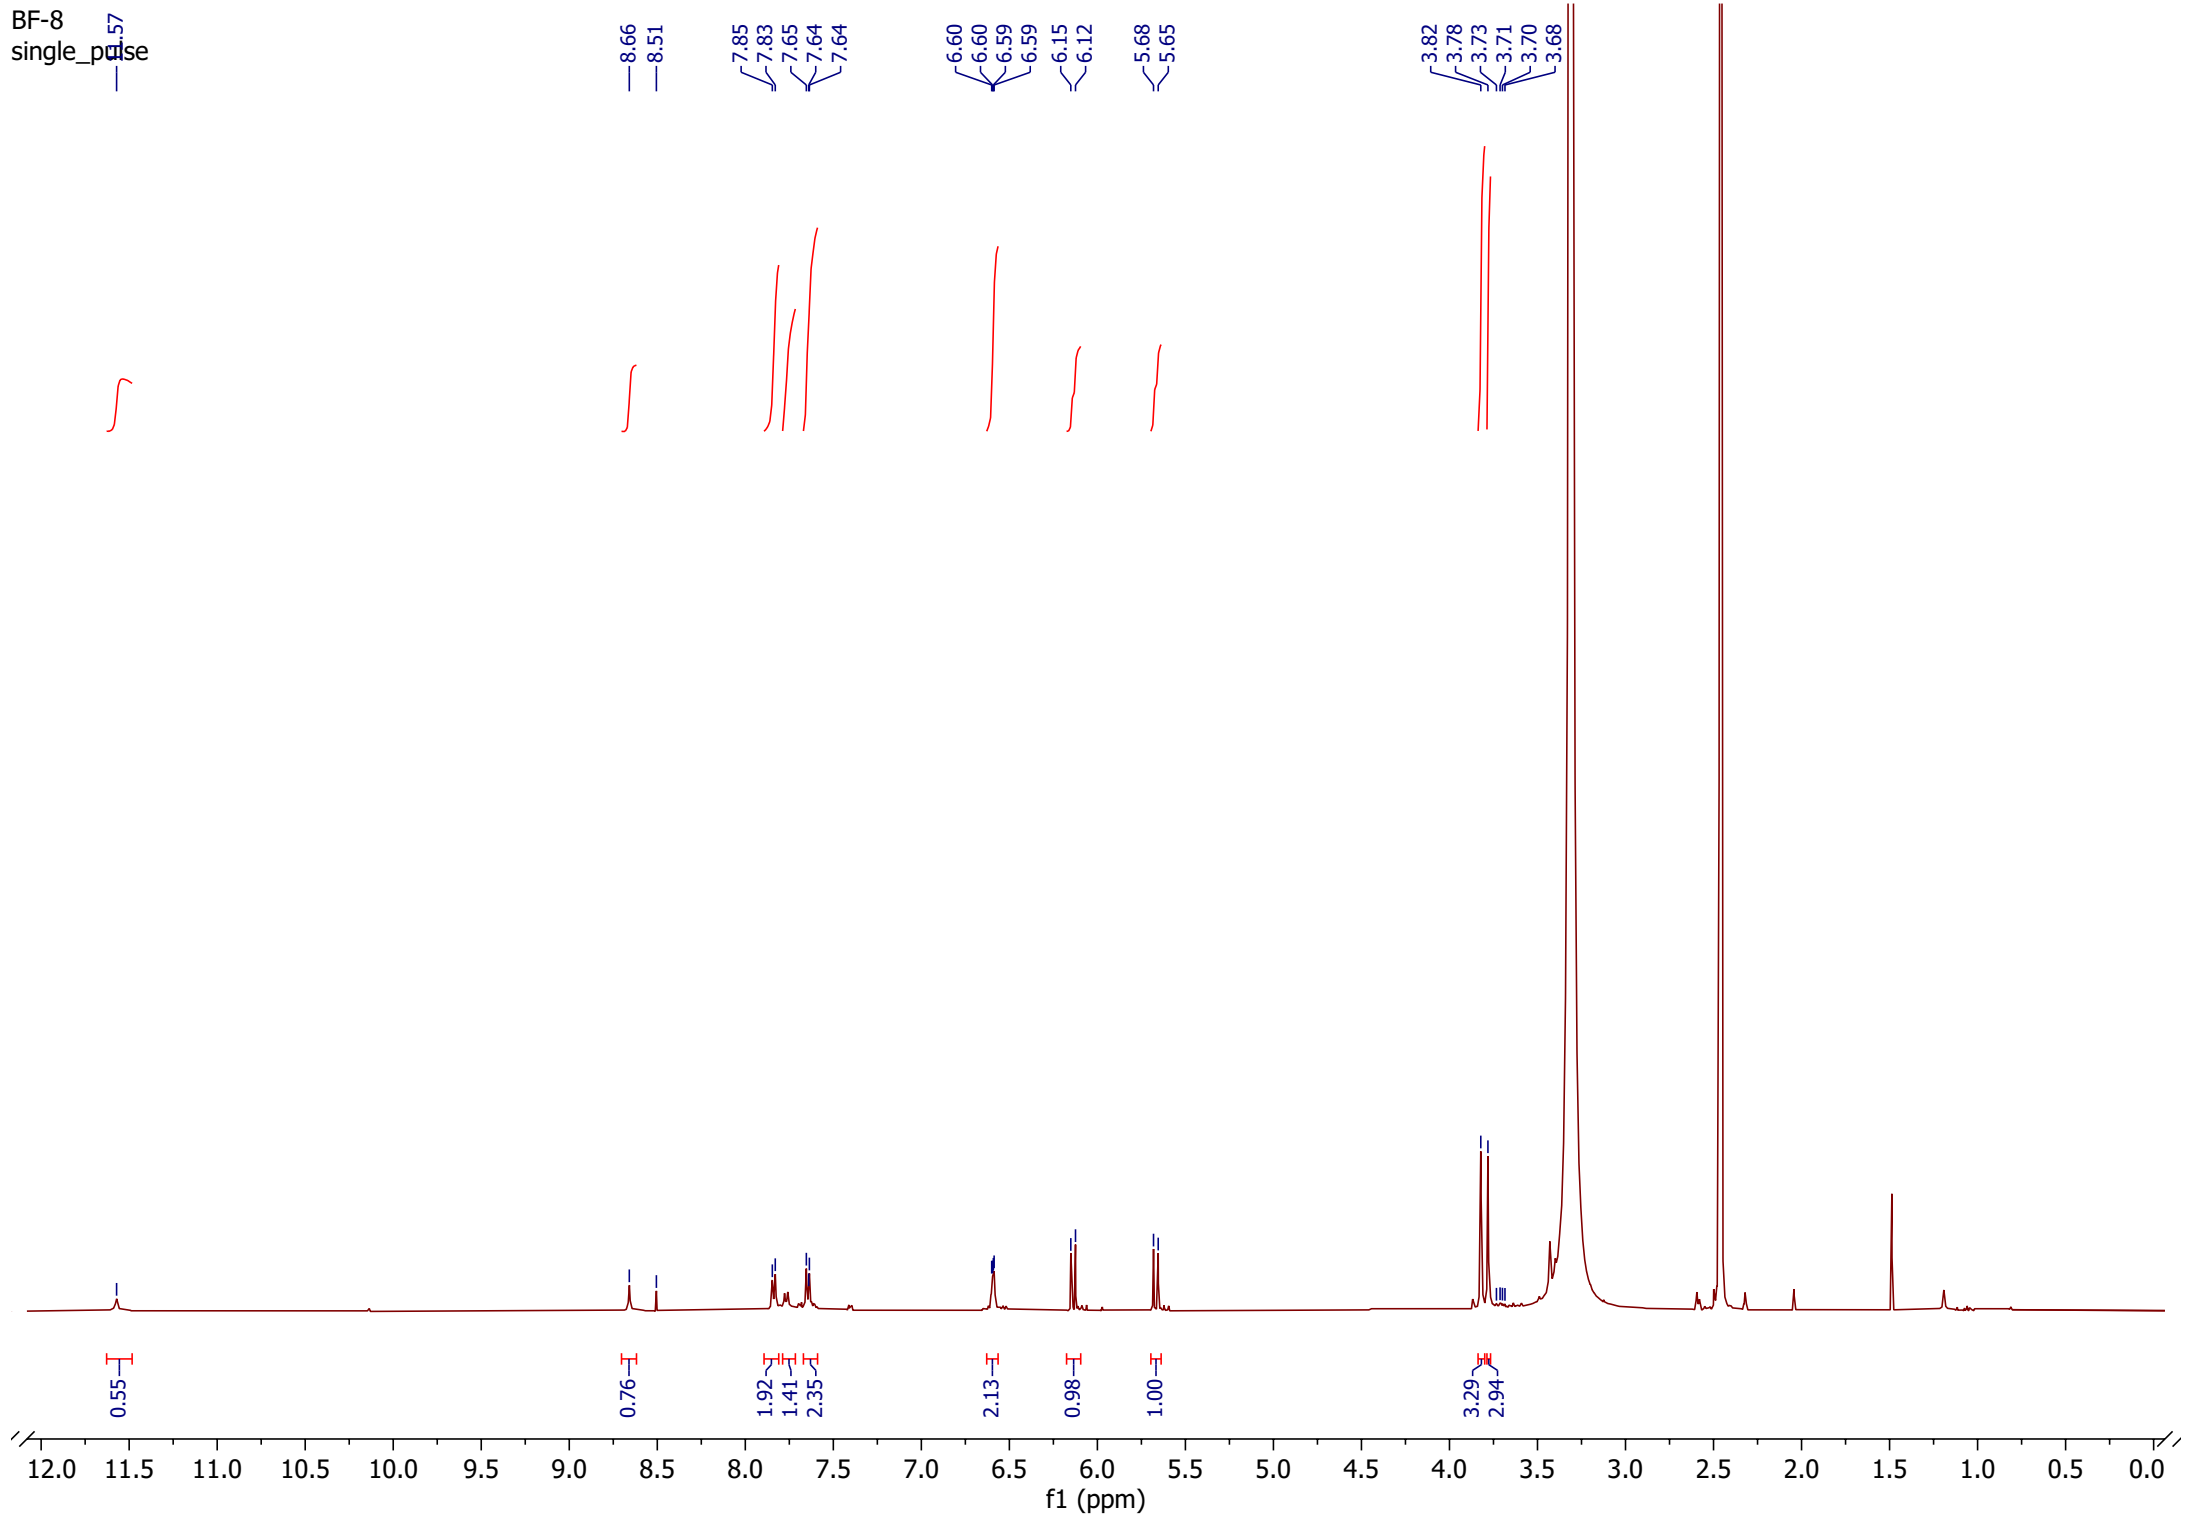

BF-9  
single\_pulse

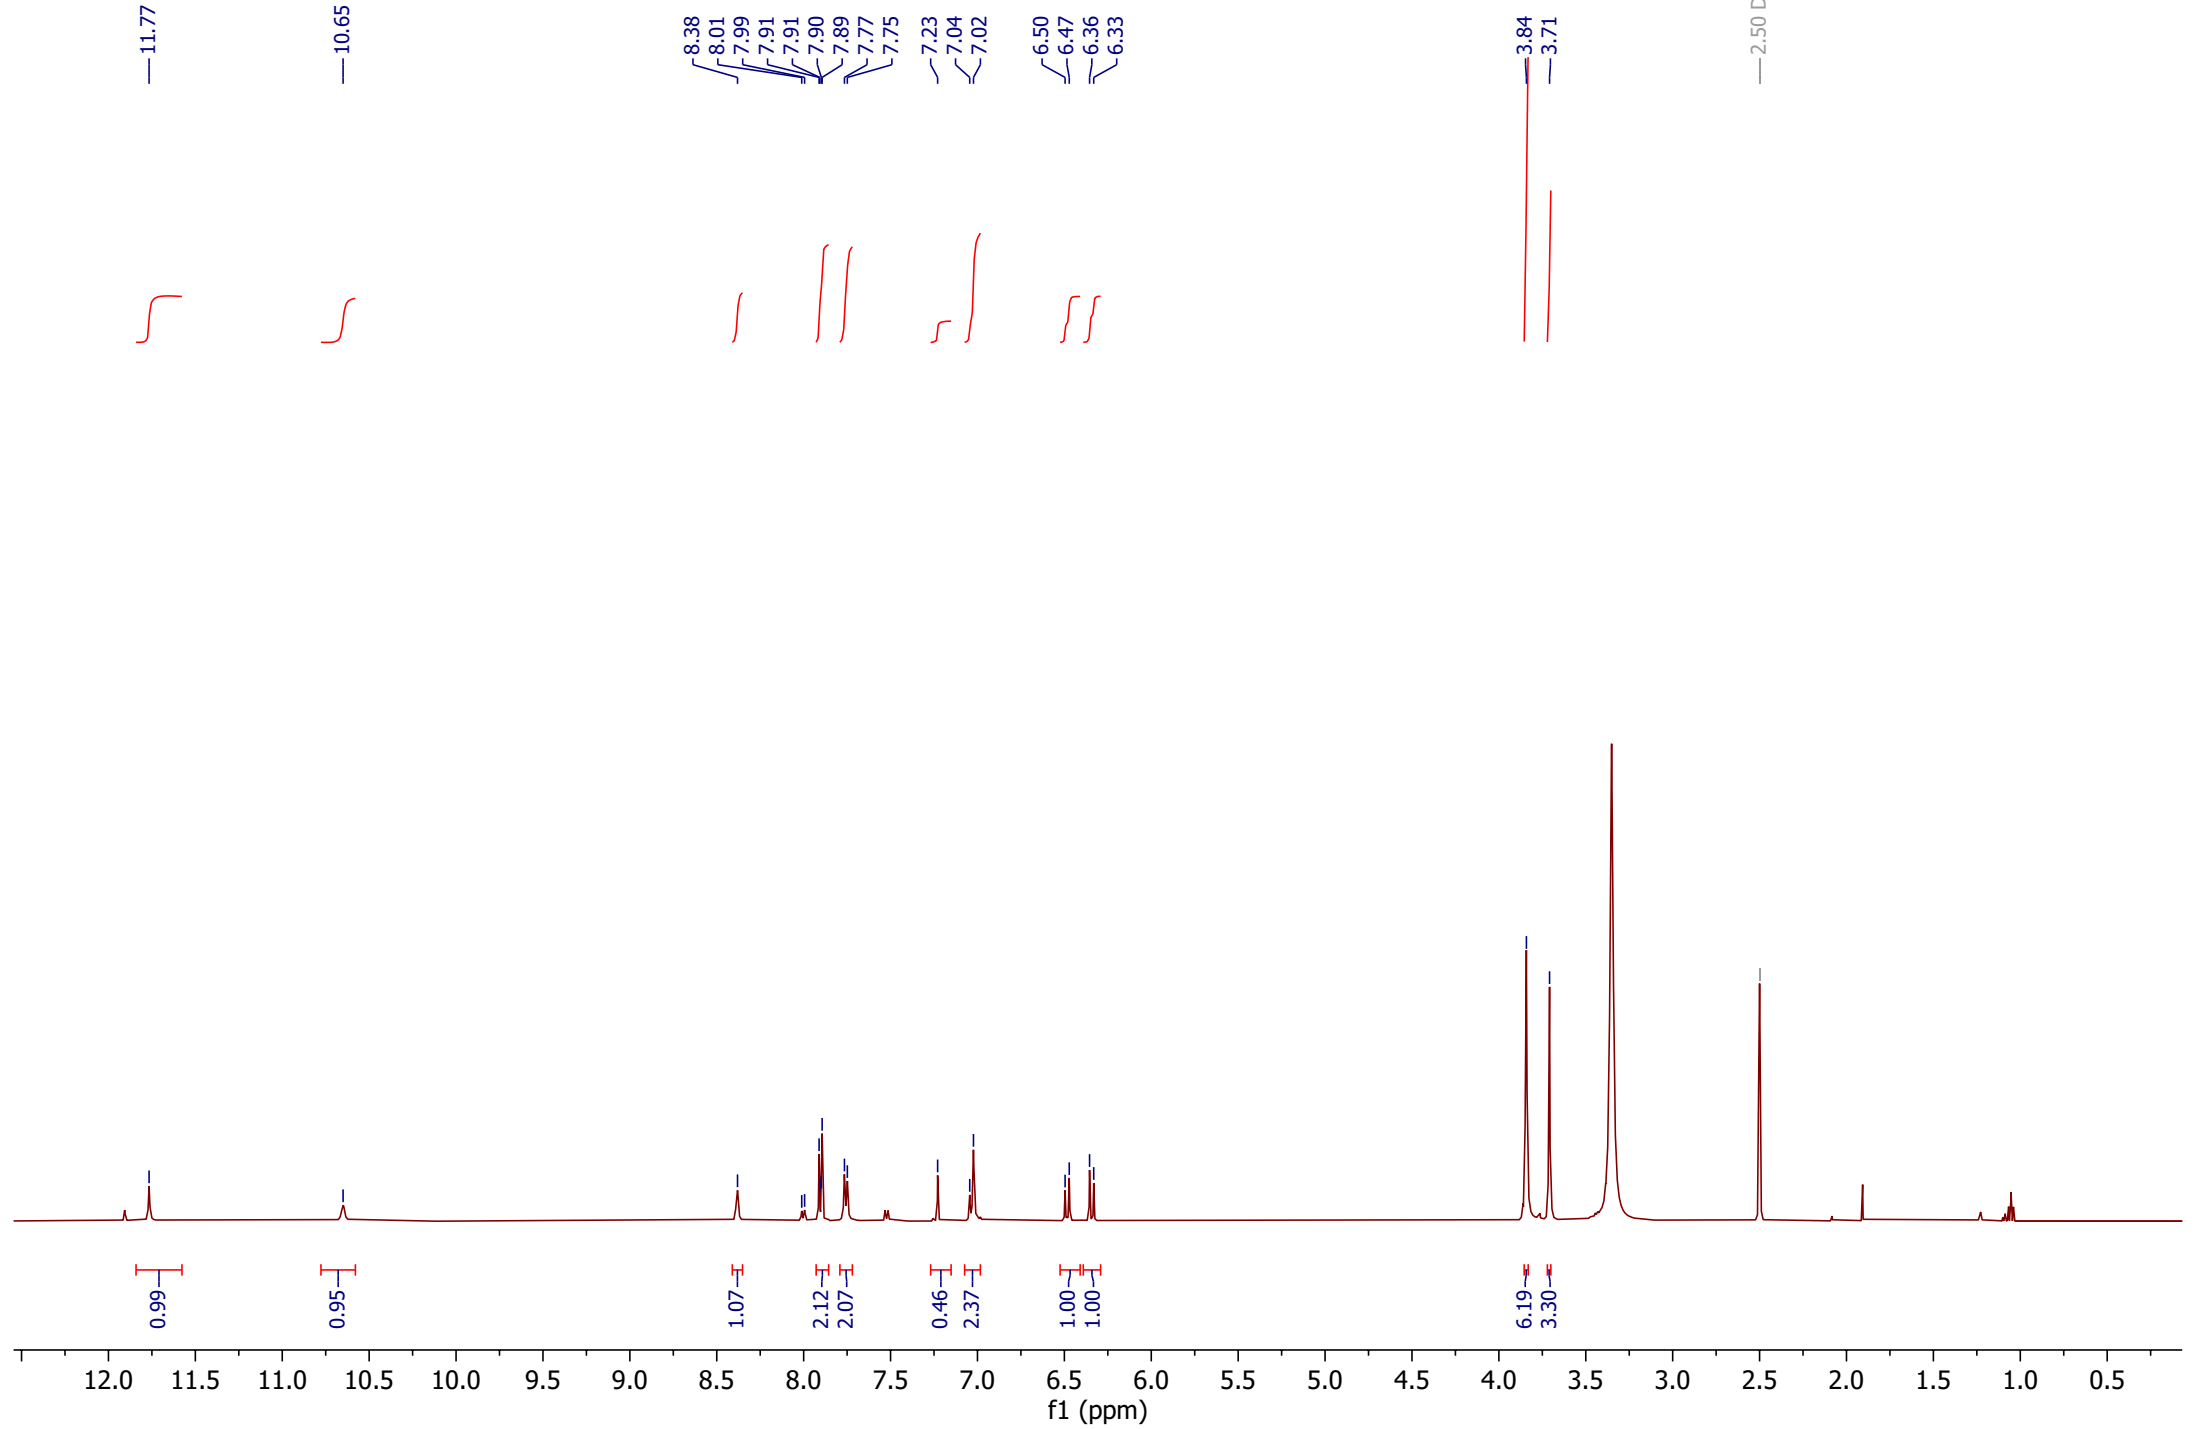

BF-10  
single\_pulse

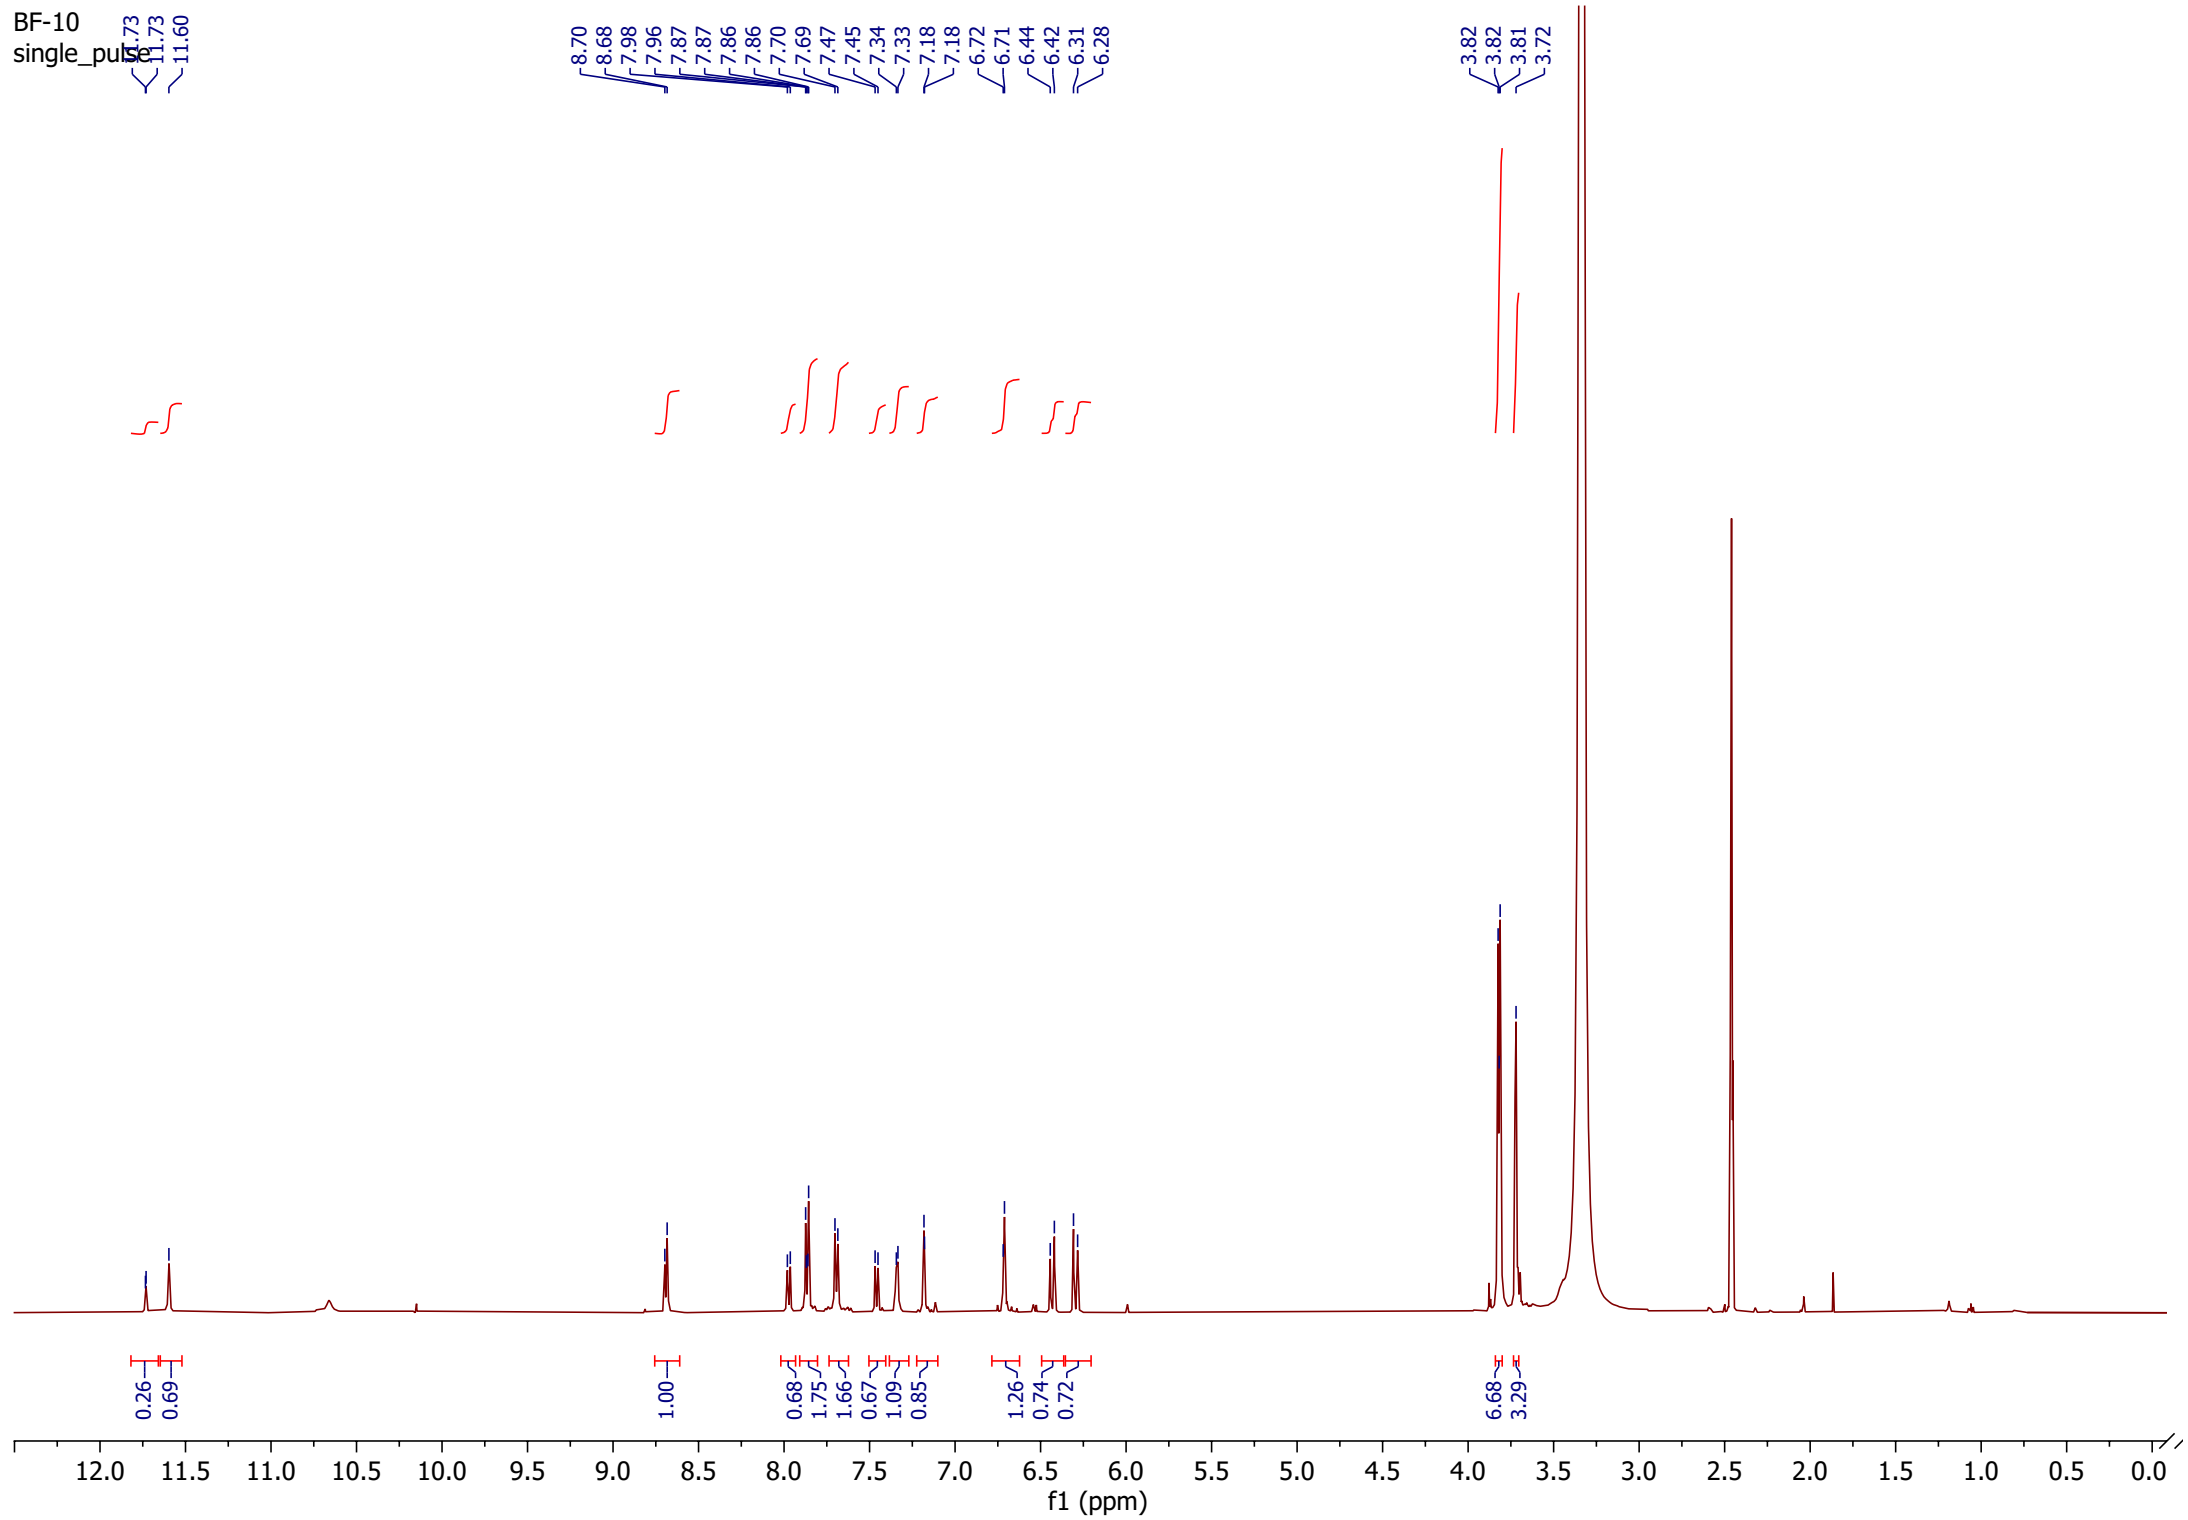

BF-11  
single\_pulse

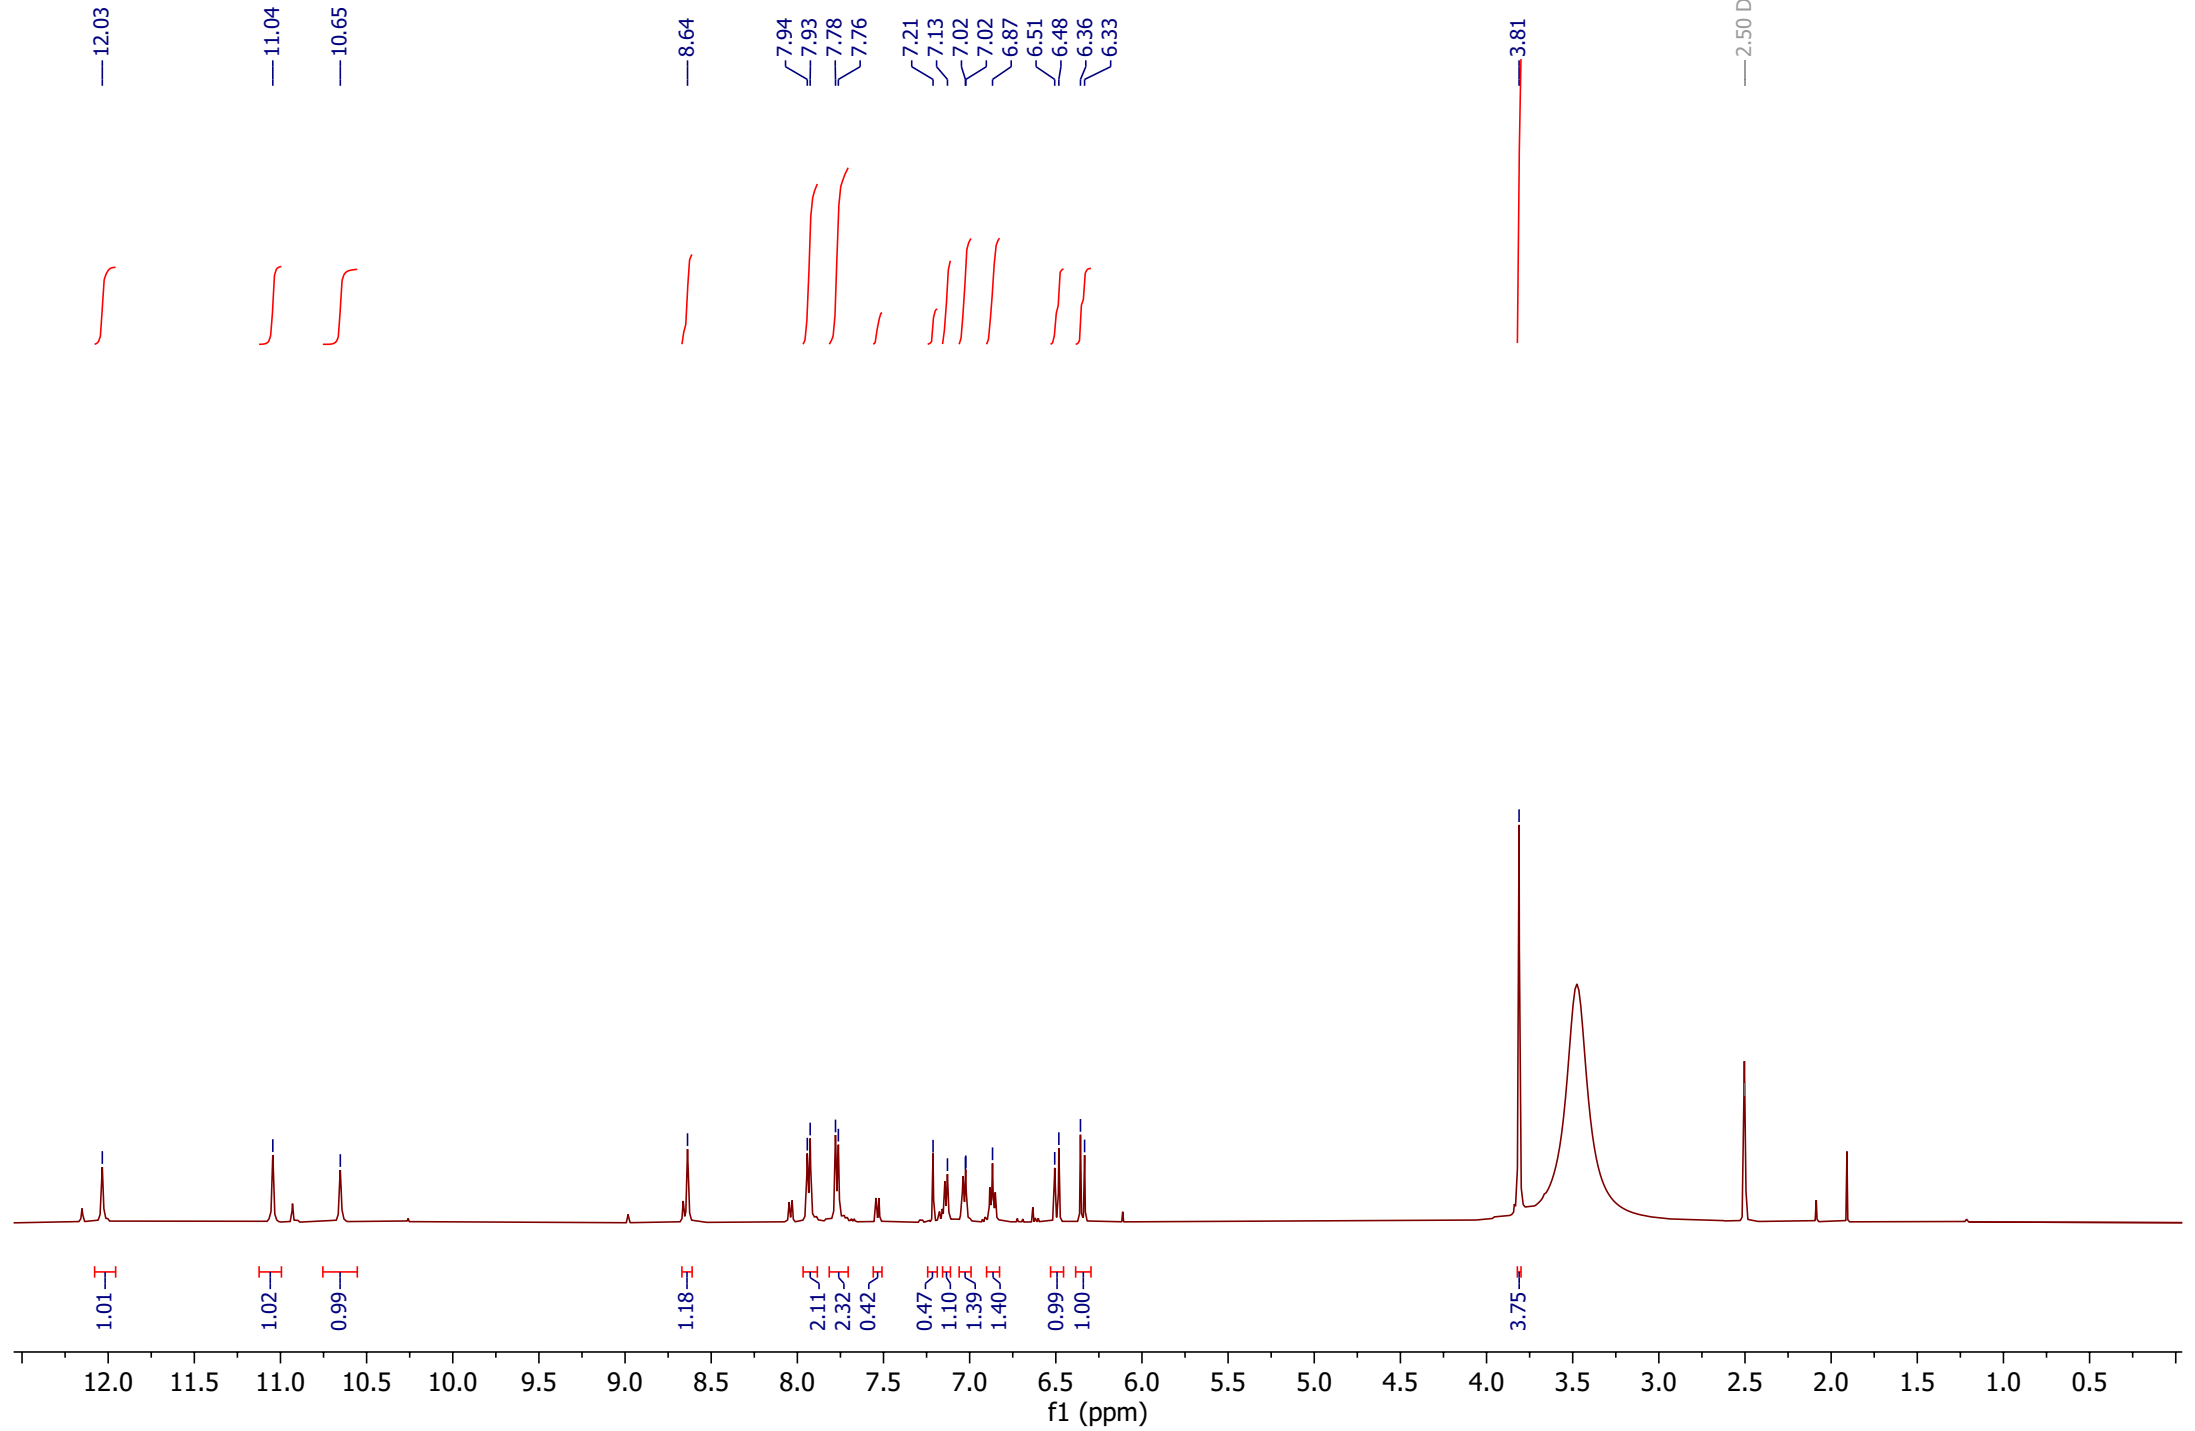

BF-12  
single\_pulse

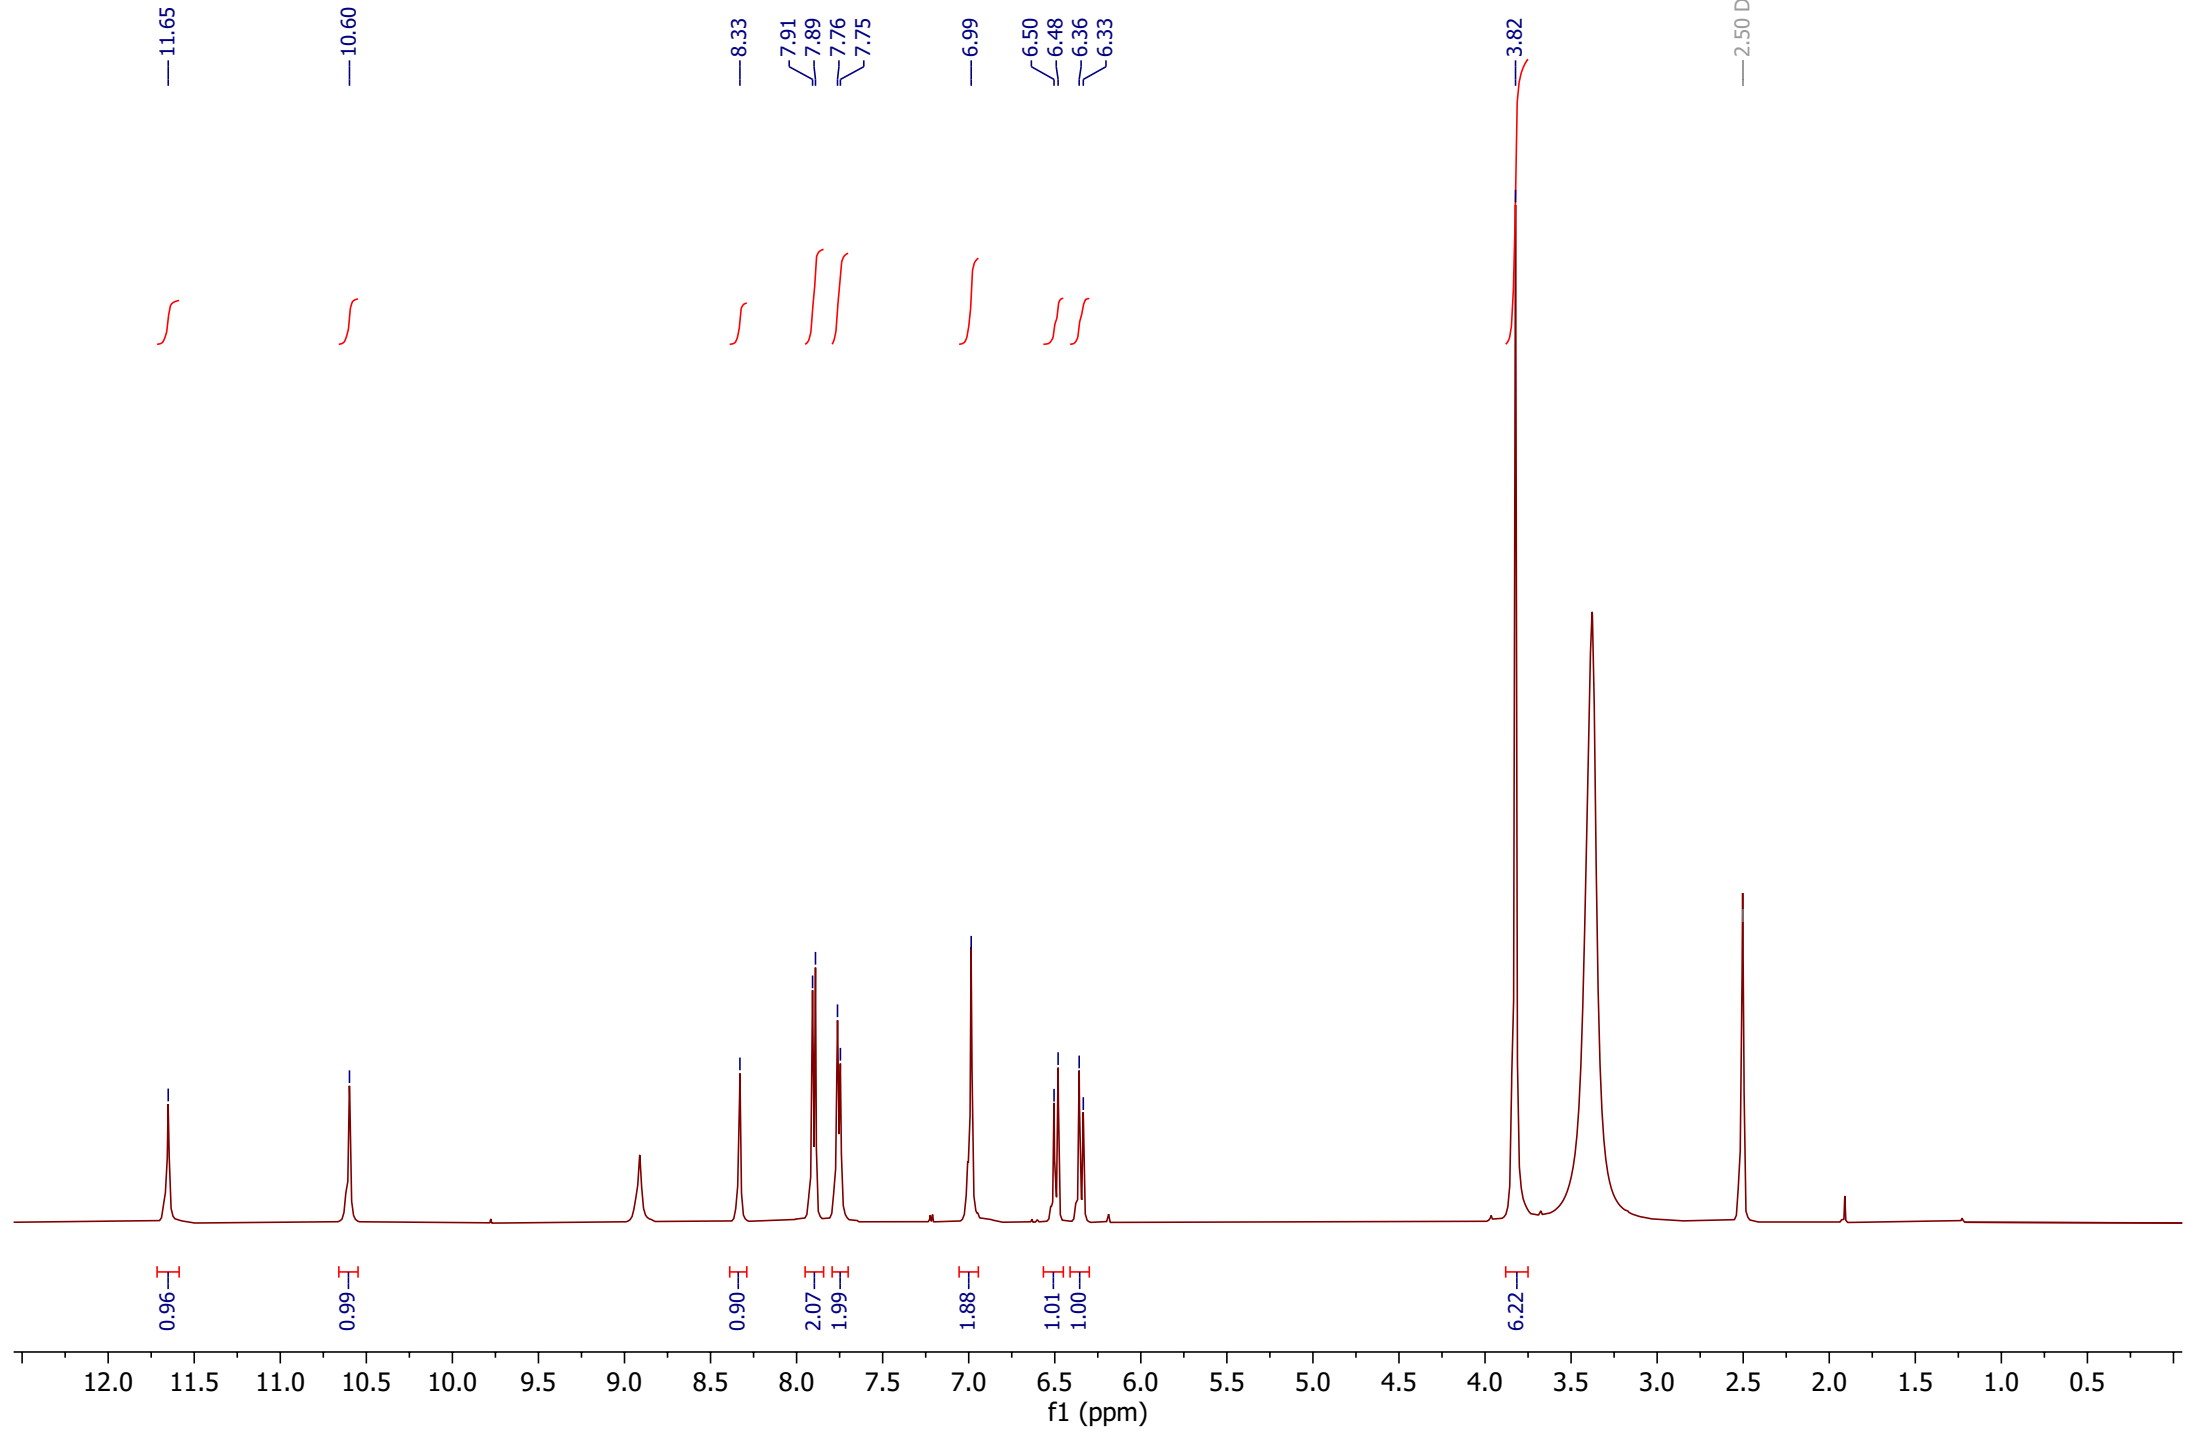

BF-1  
single pulse decoupled gated NOE

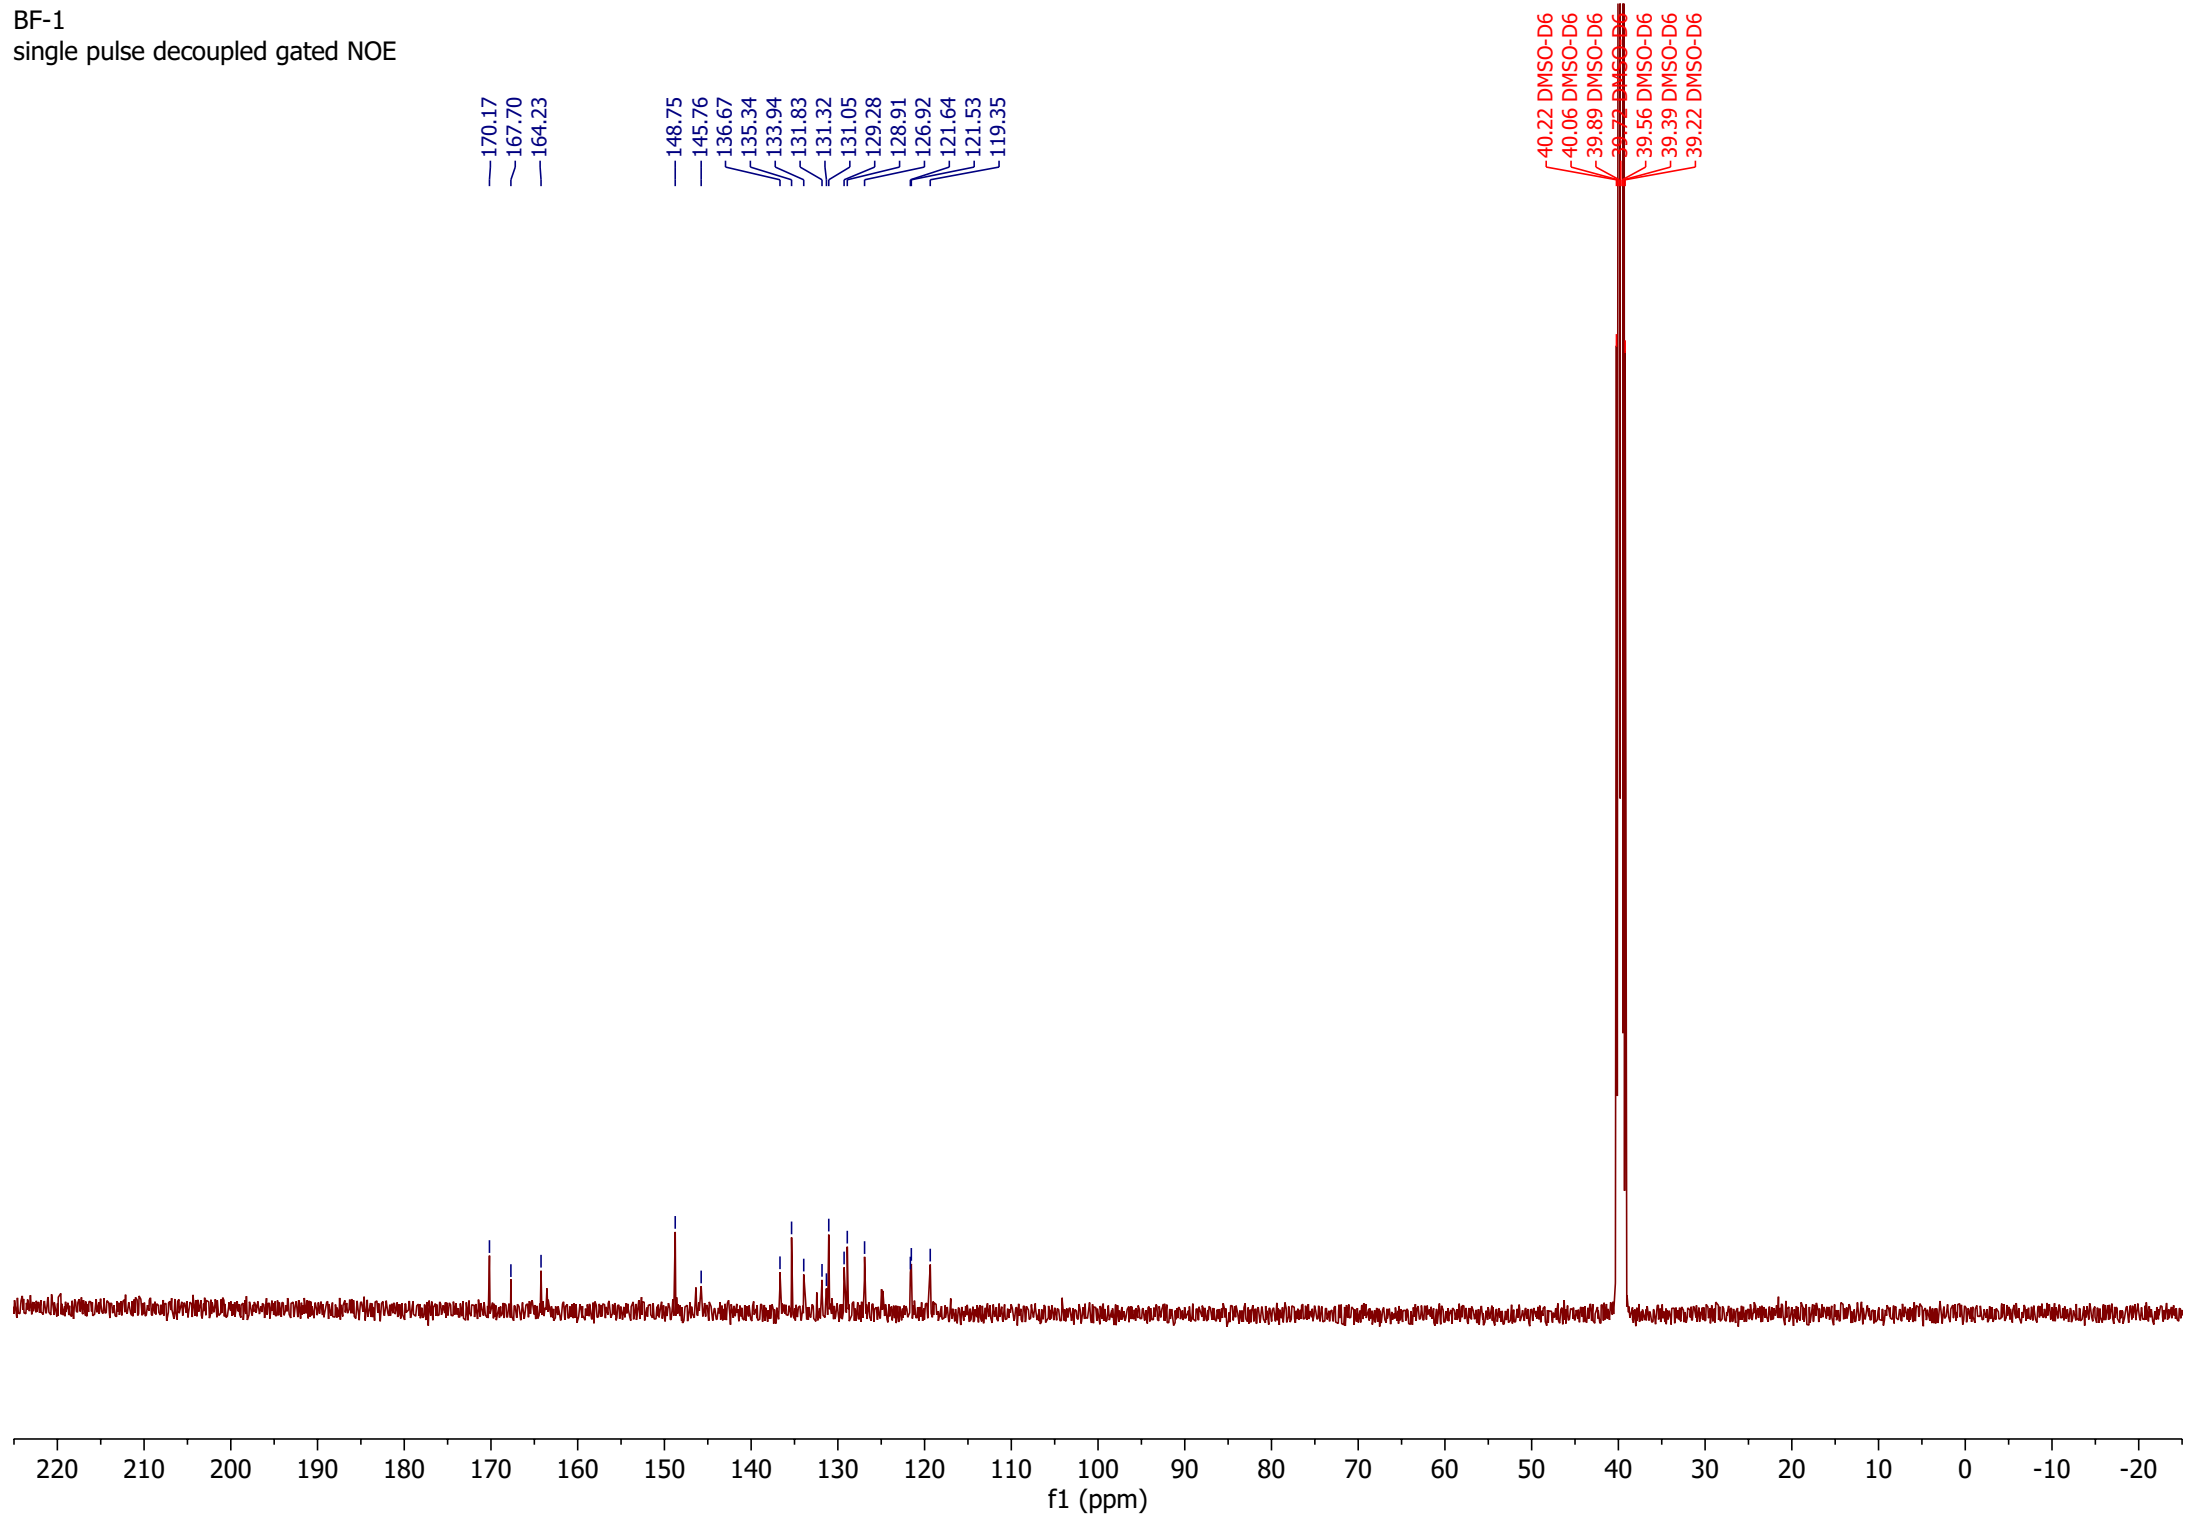

BF-2  
single pulse decoupled gated NOE

167.67  
164.19 163.34  
146.91  
135.33  
135.09  
133.73  
131.86  
131.08  
129.49  
129.30  
129.19  
128.39  
119.35

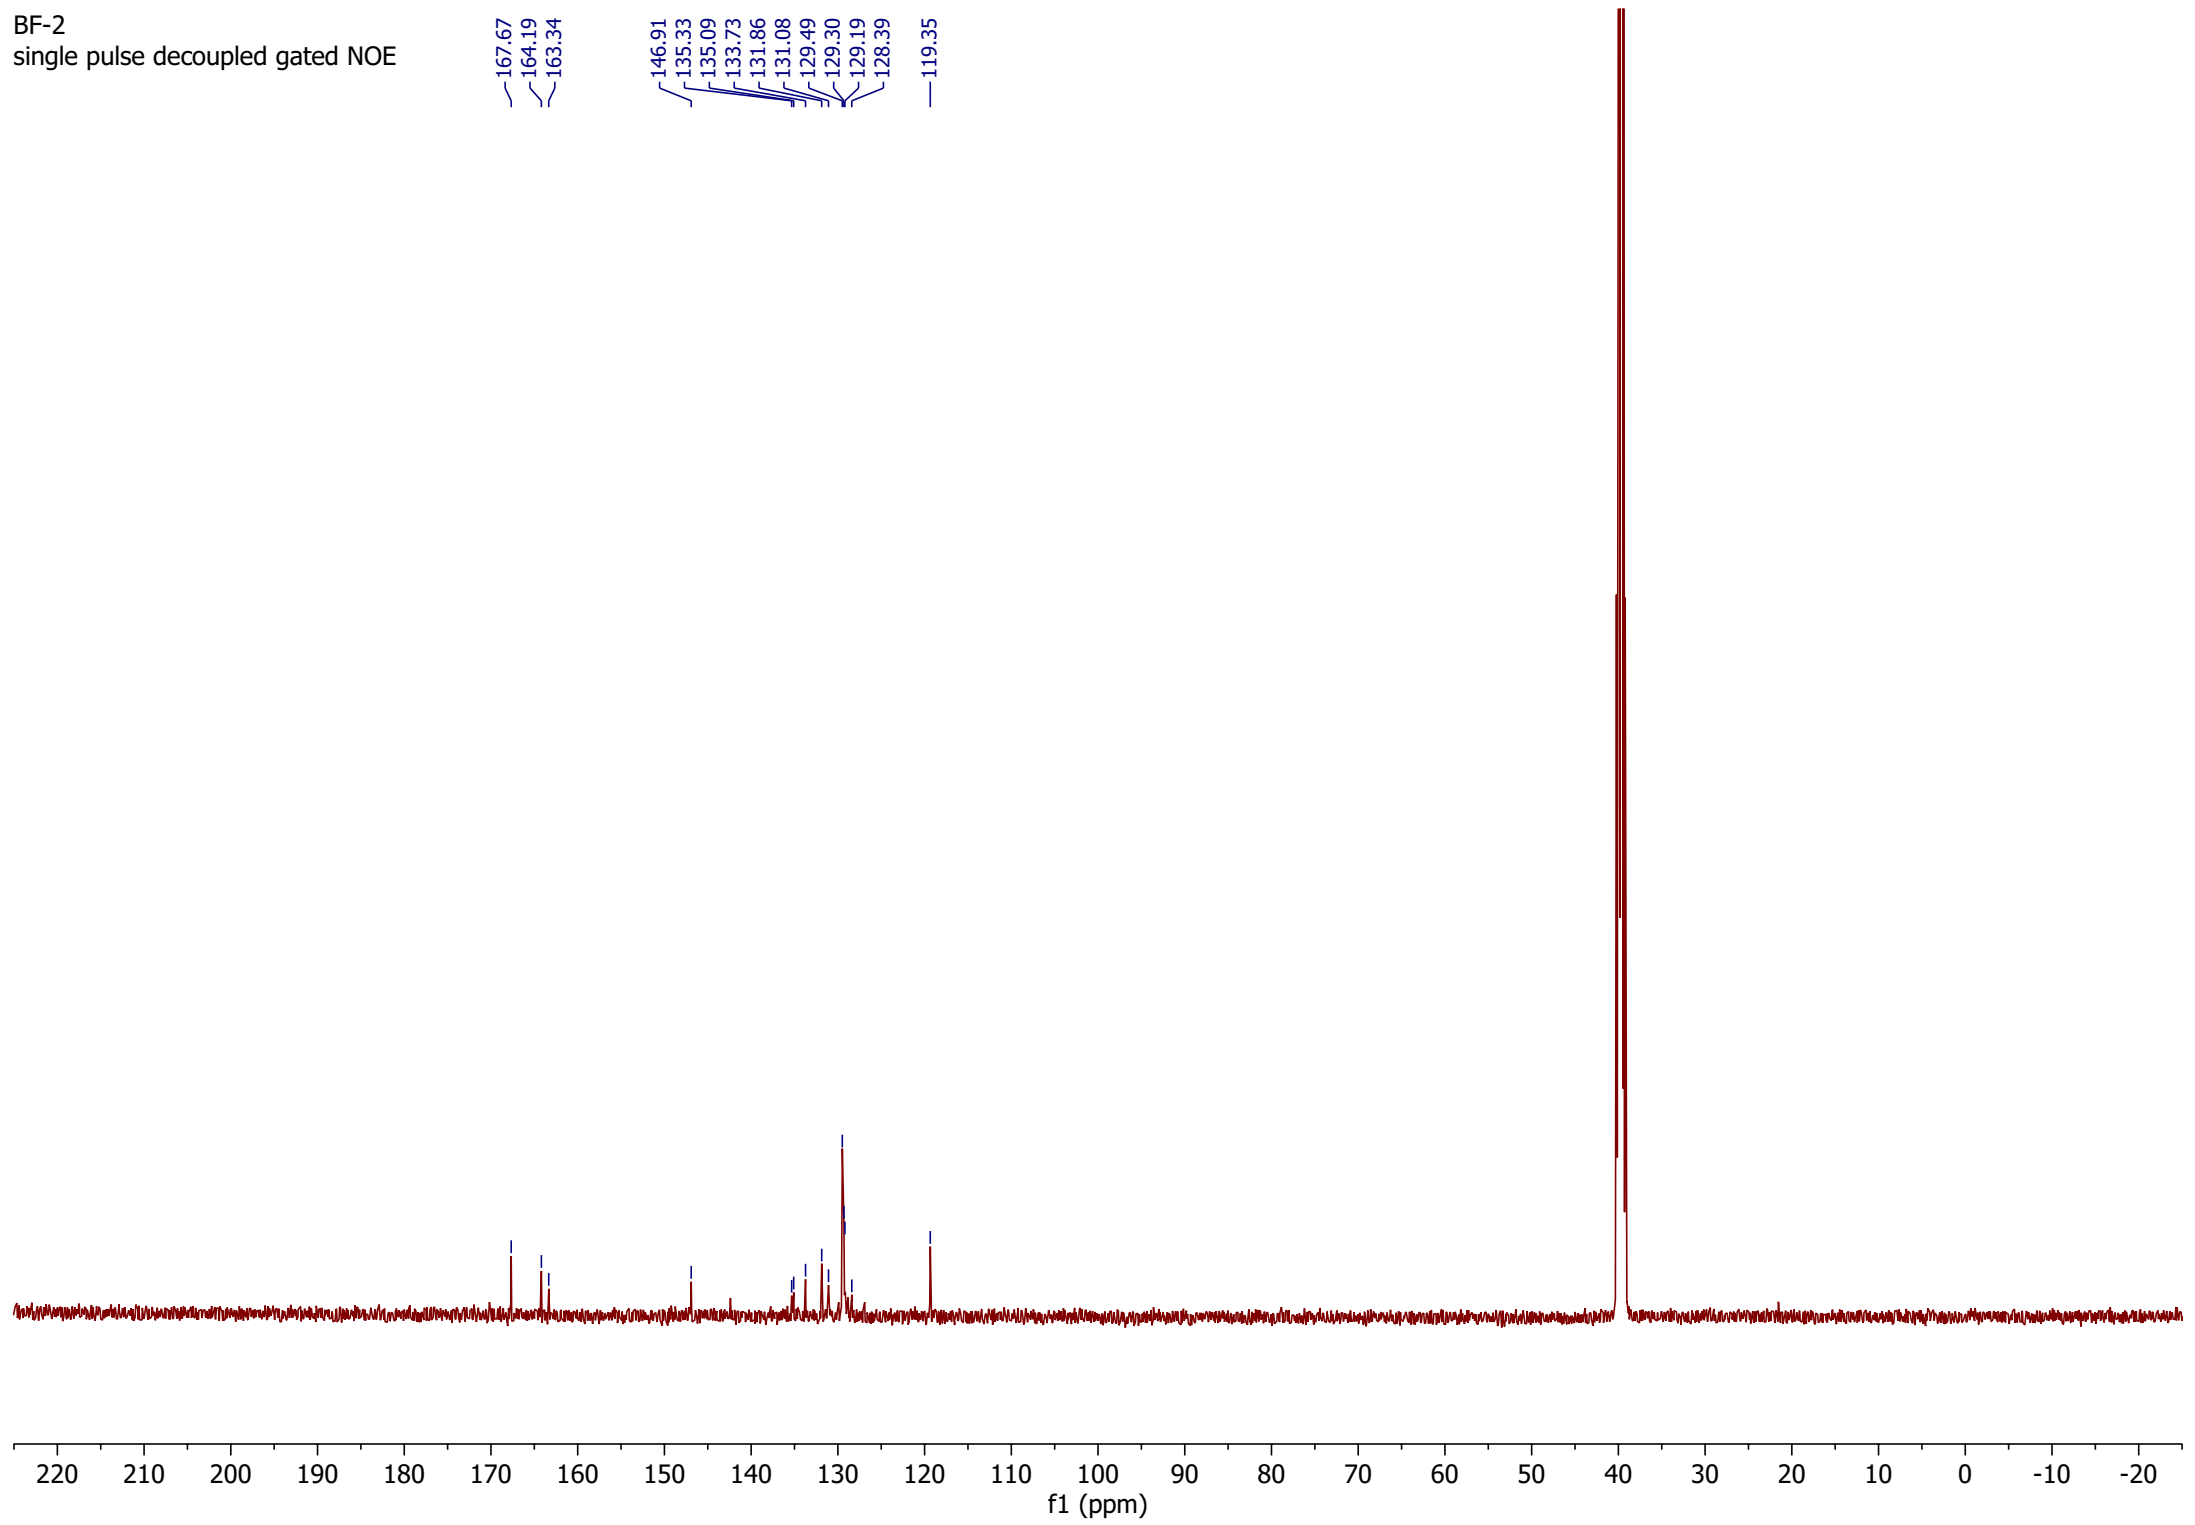

BF-3  
single pulse decoupled gated NOE

170.18  
167.70  
164.23  
163.49  
  
135.34  
134.31  
131.82  
131.28  
129.34  
128.96  
128.57  
126.89  
125.19  
119.31

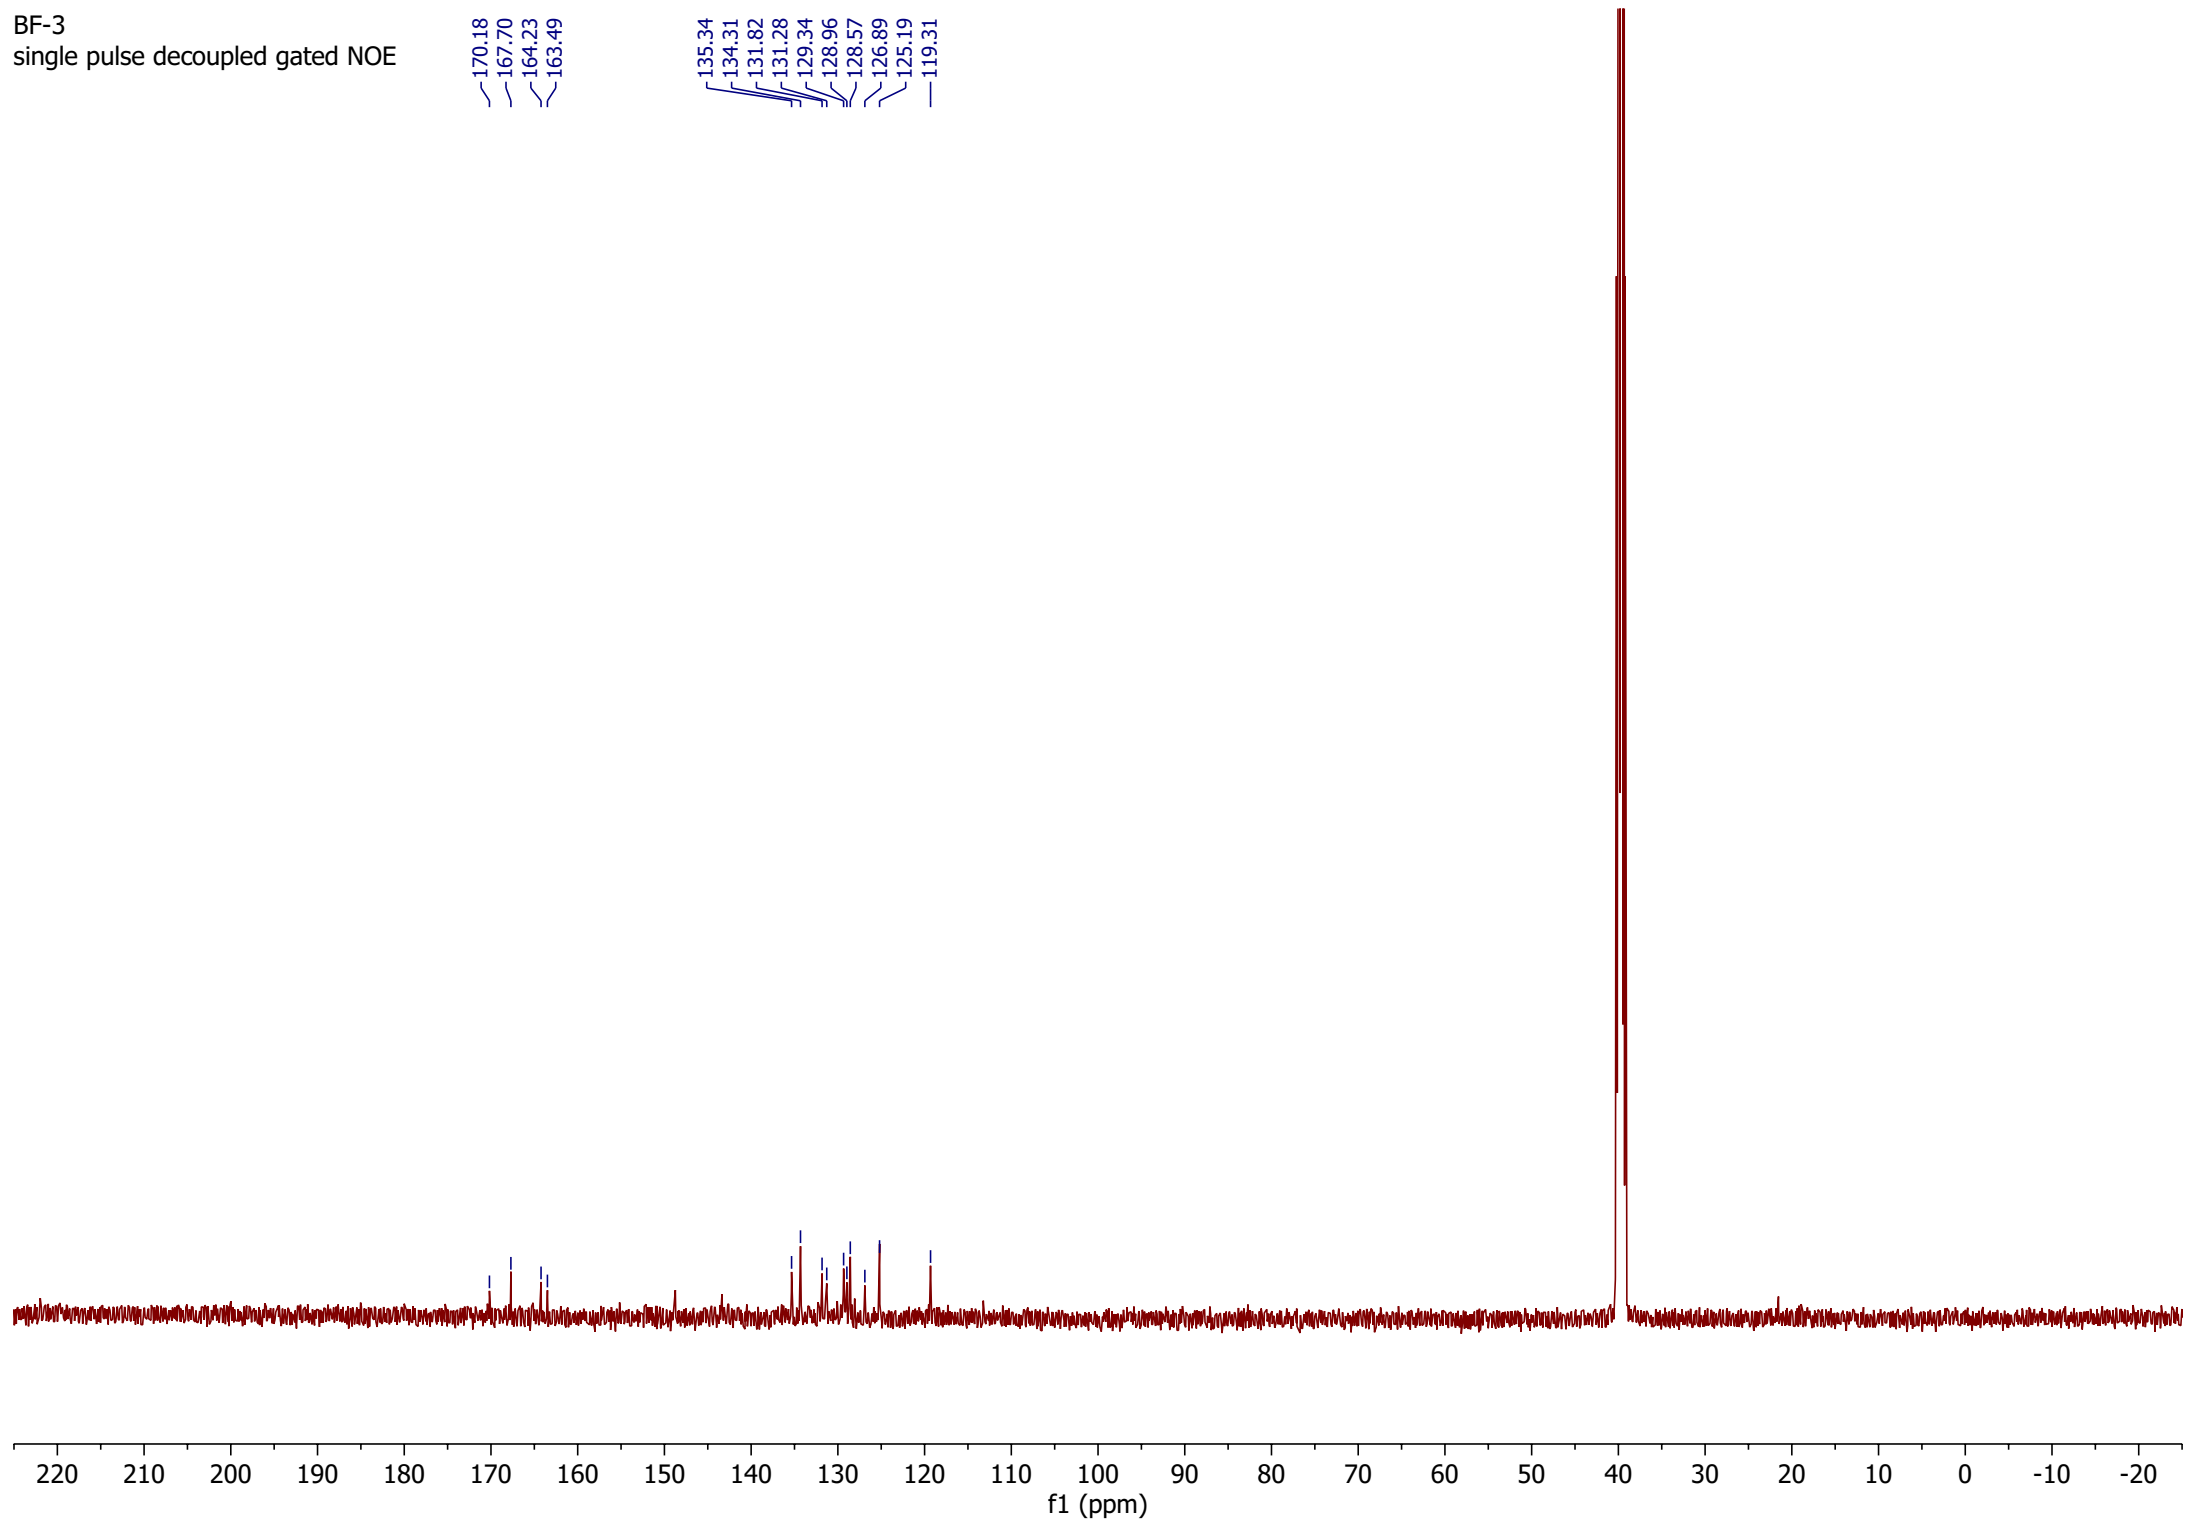

BF-5  
single pulse decoupled gated NOE

167.64  
164.17  
163.23  
158.08  
  
148.31  
  
142.28  
136.09  
131.90  
130.93  
130.50  
129.14  
128.57  
  
119.34  
118.00  
113.24

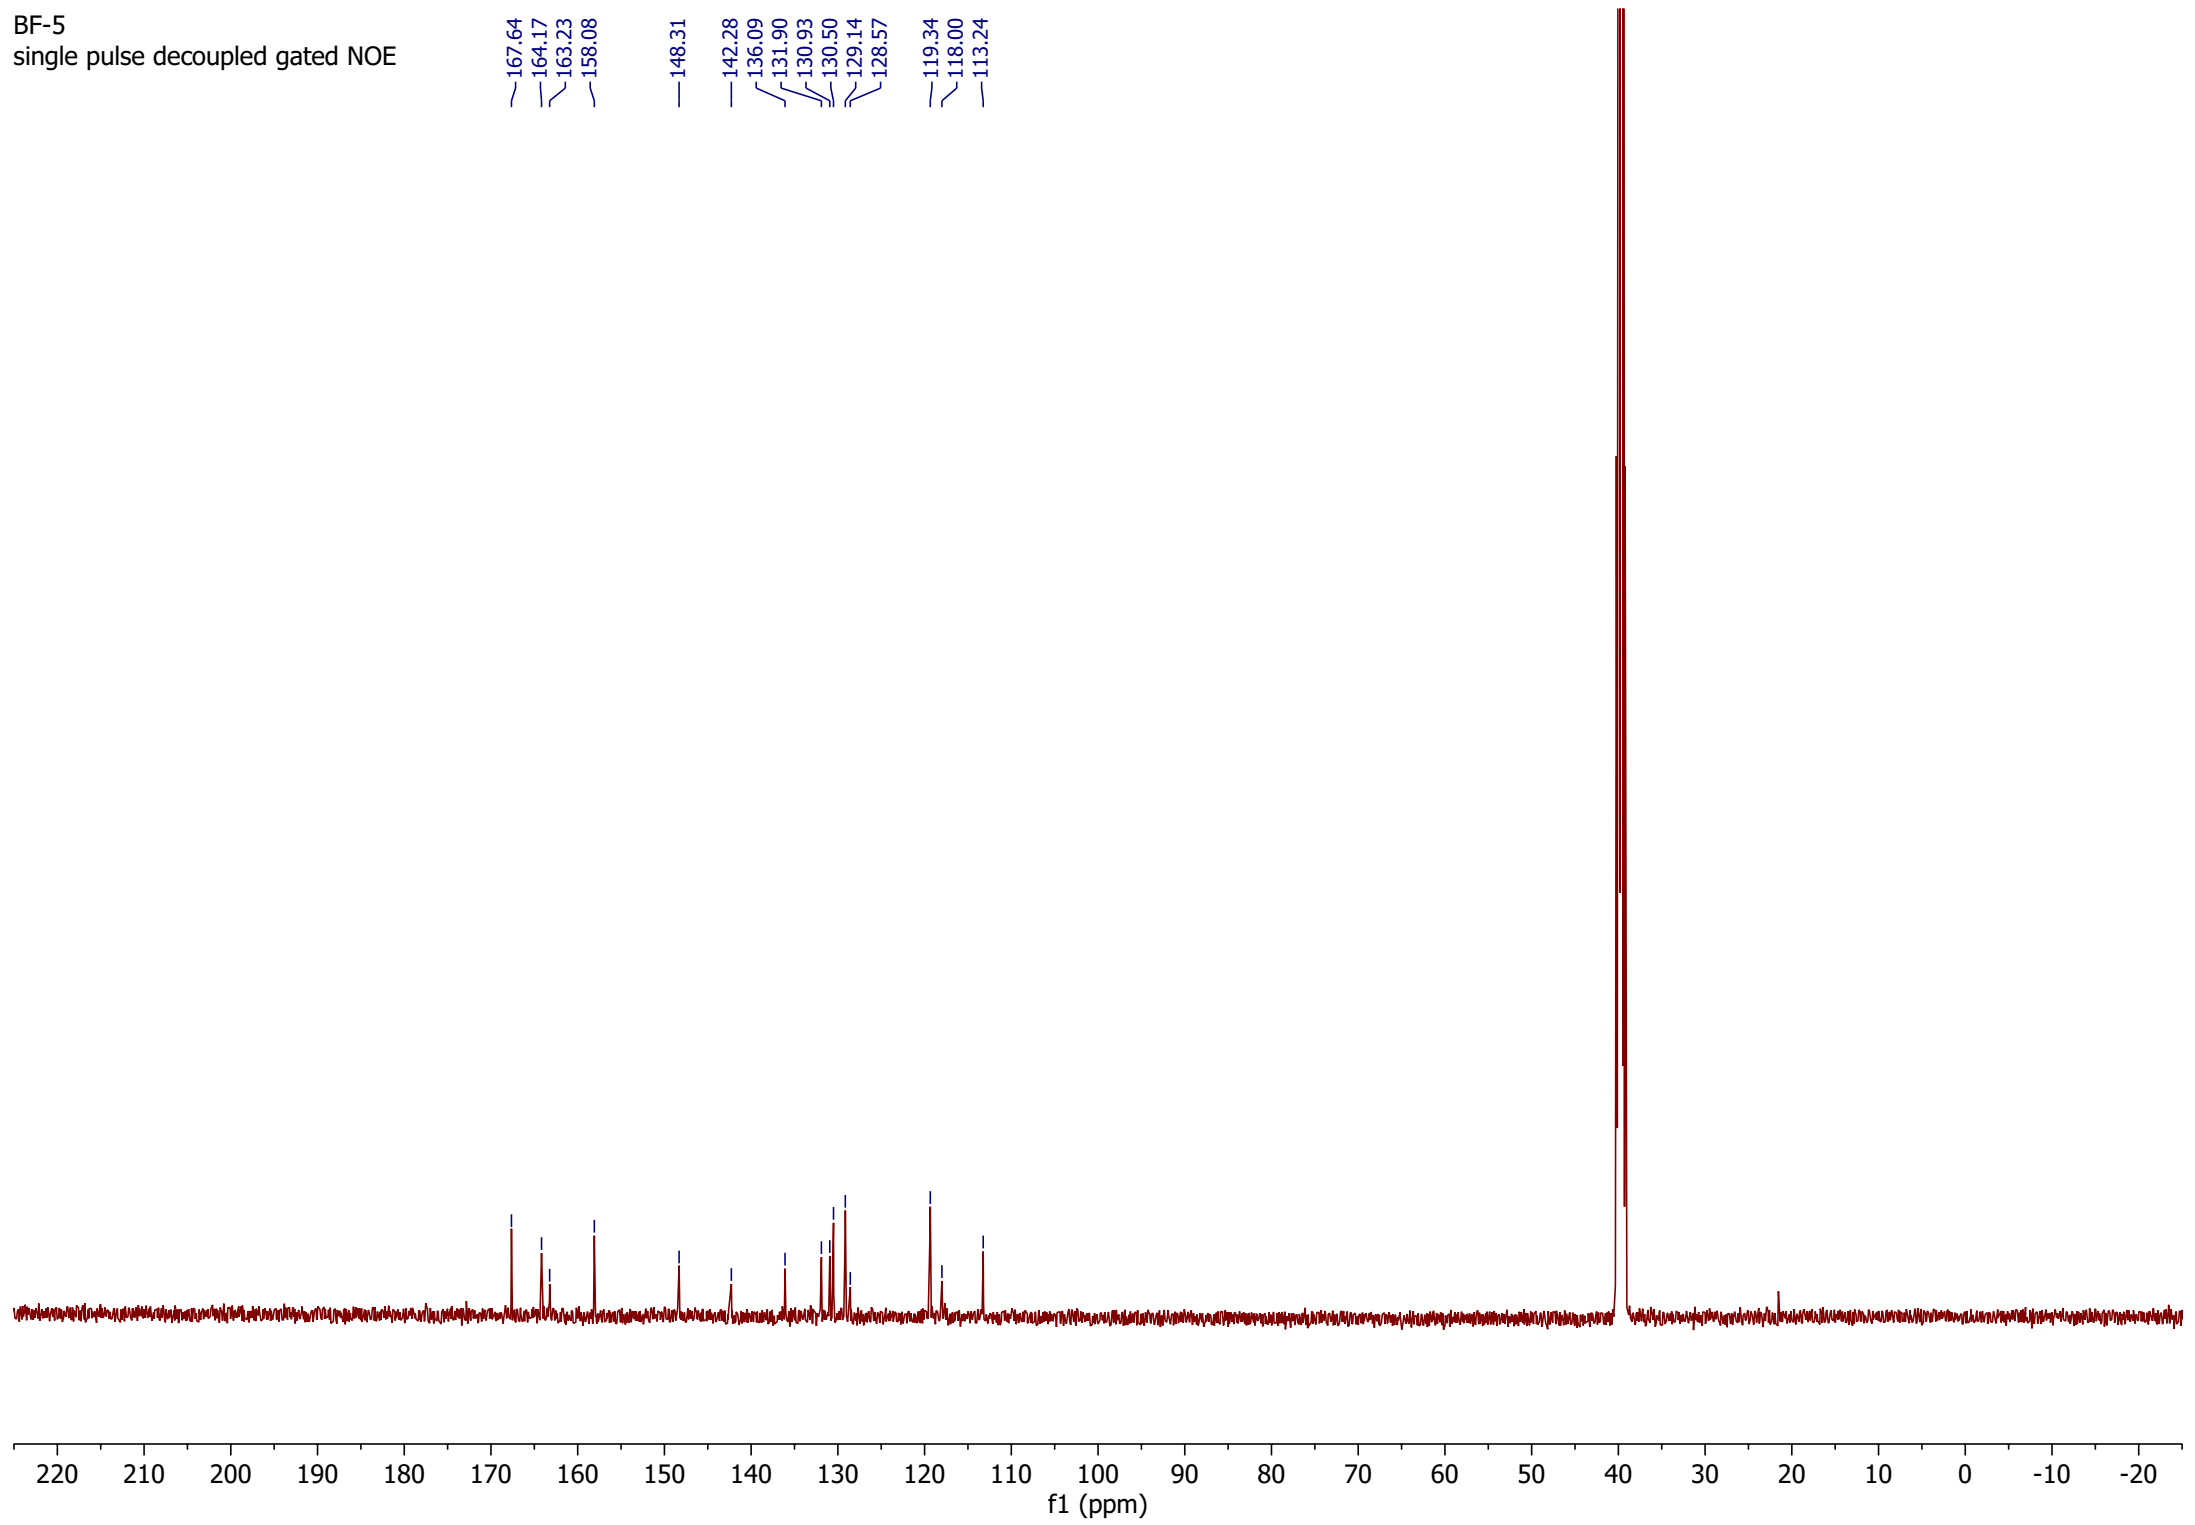

BF-6  
single pulse decoupled gated NOE

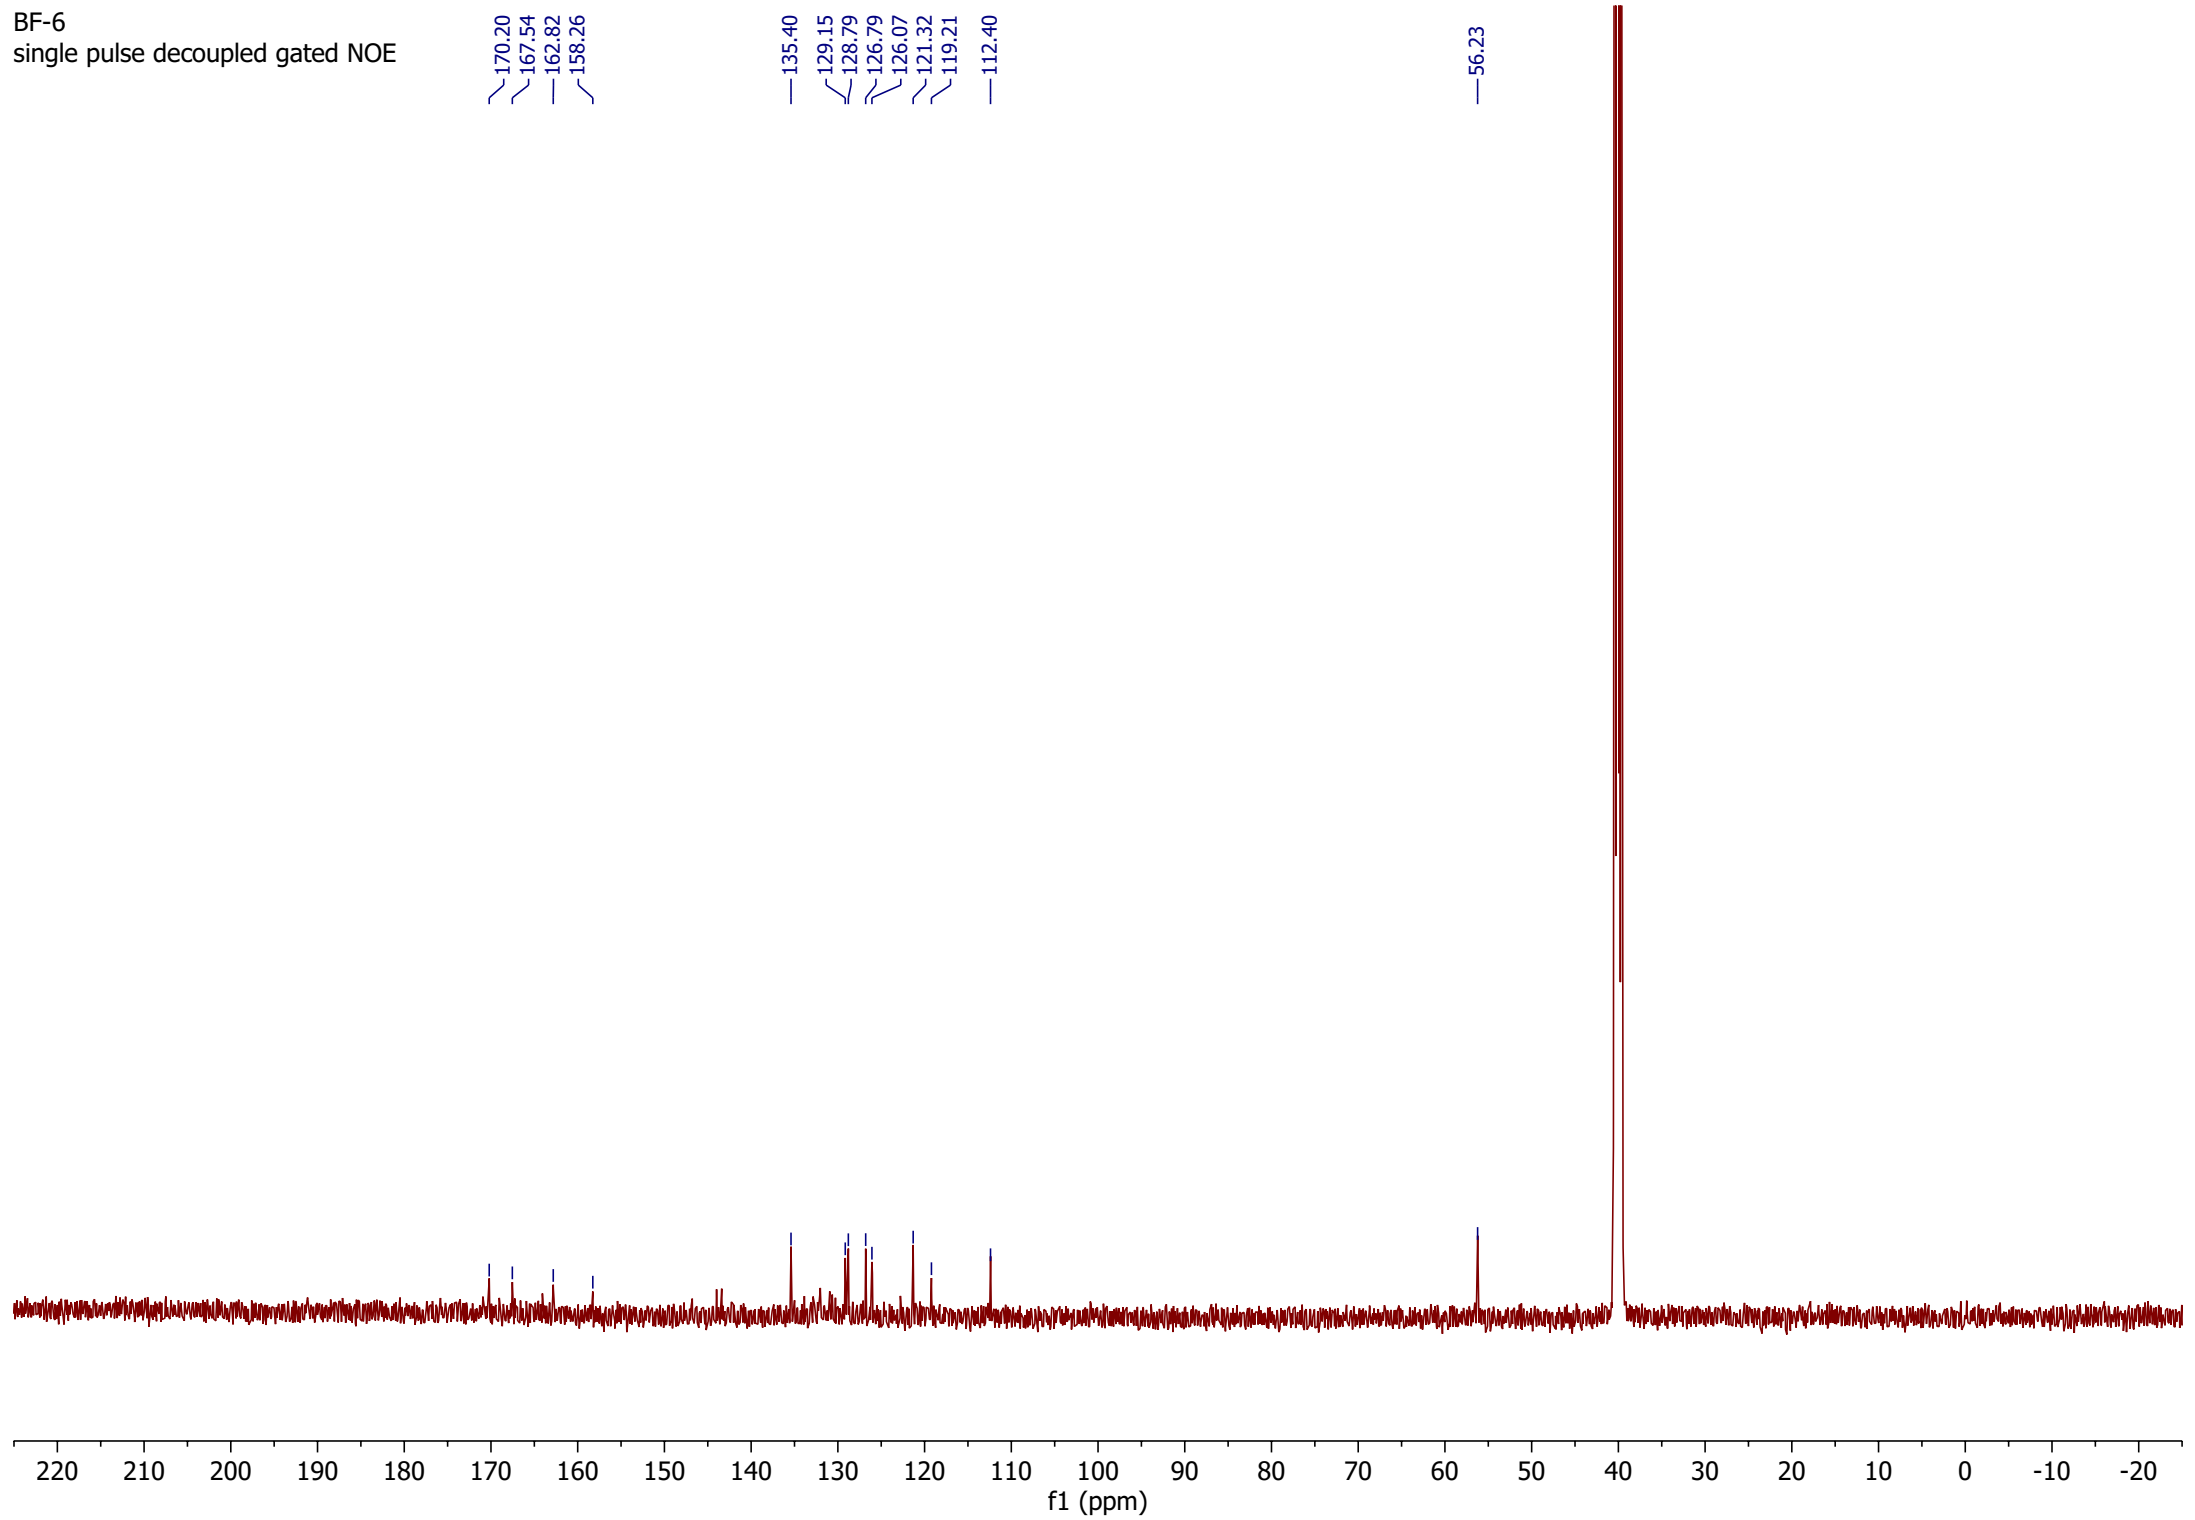

BF-7  
single pulse decoupled gated NOE

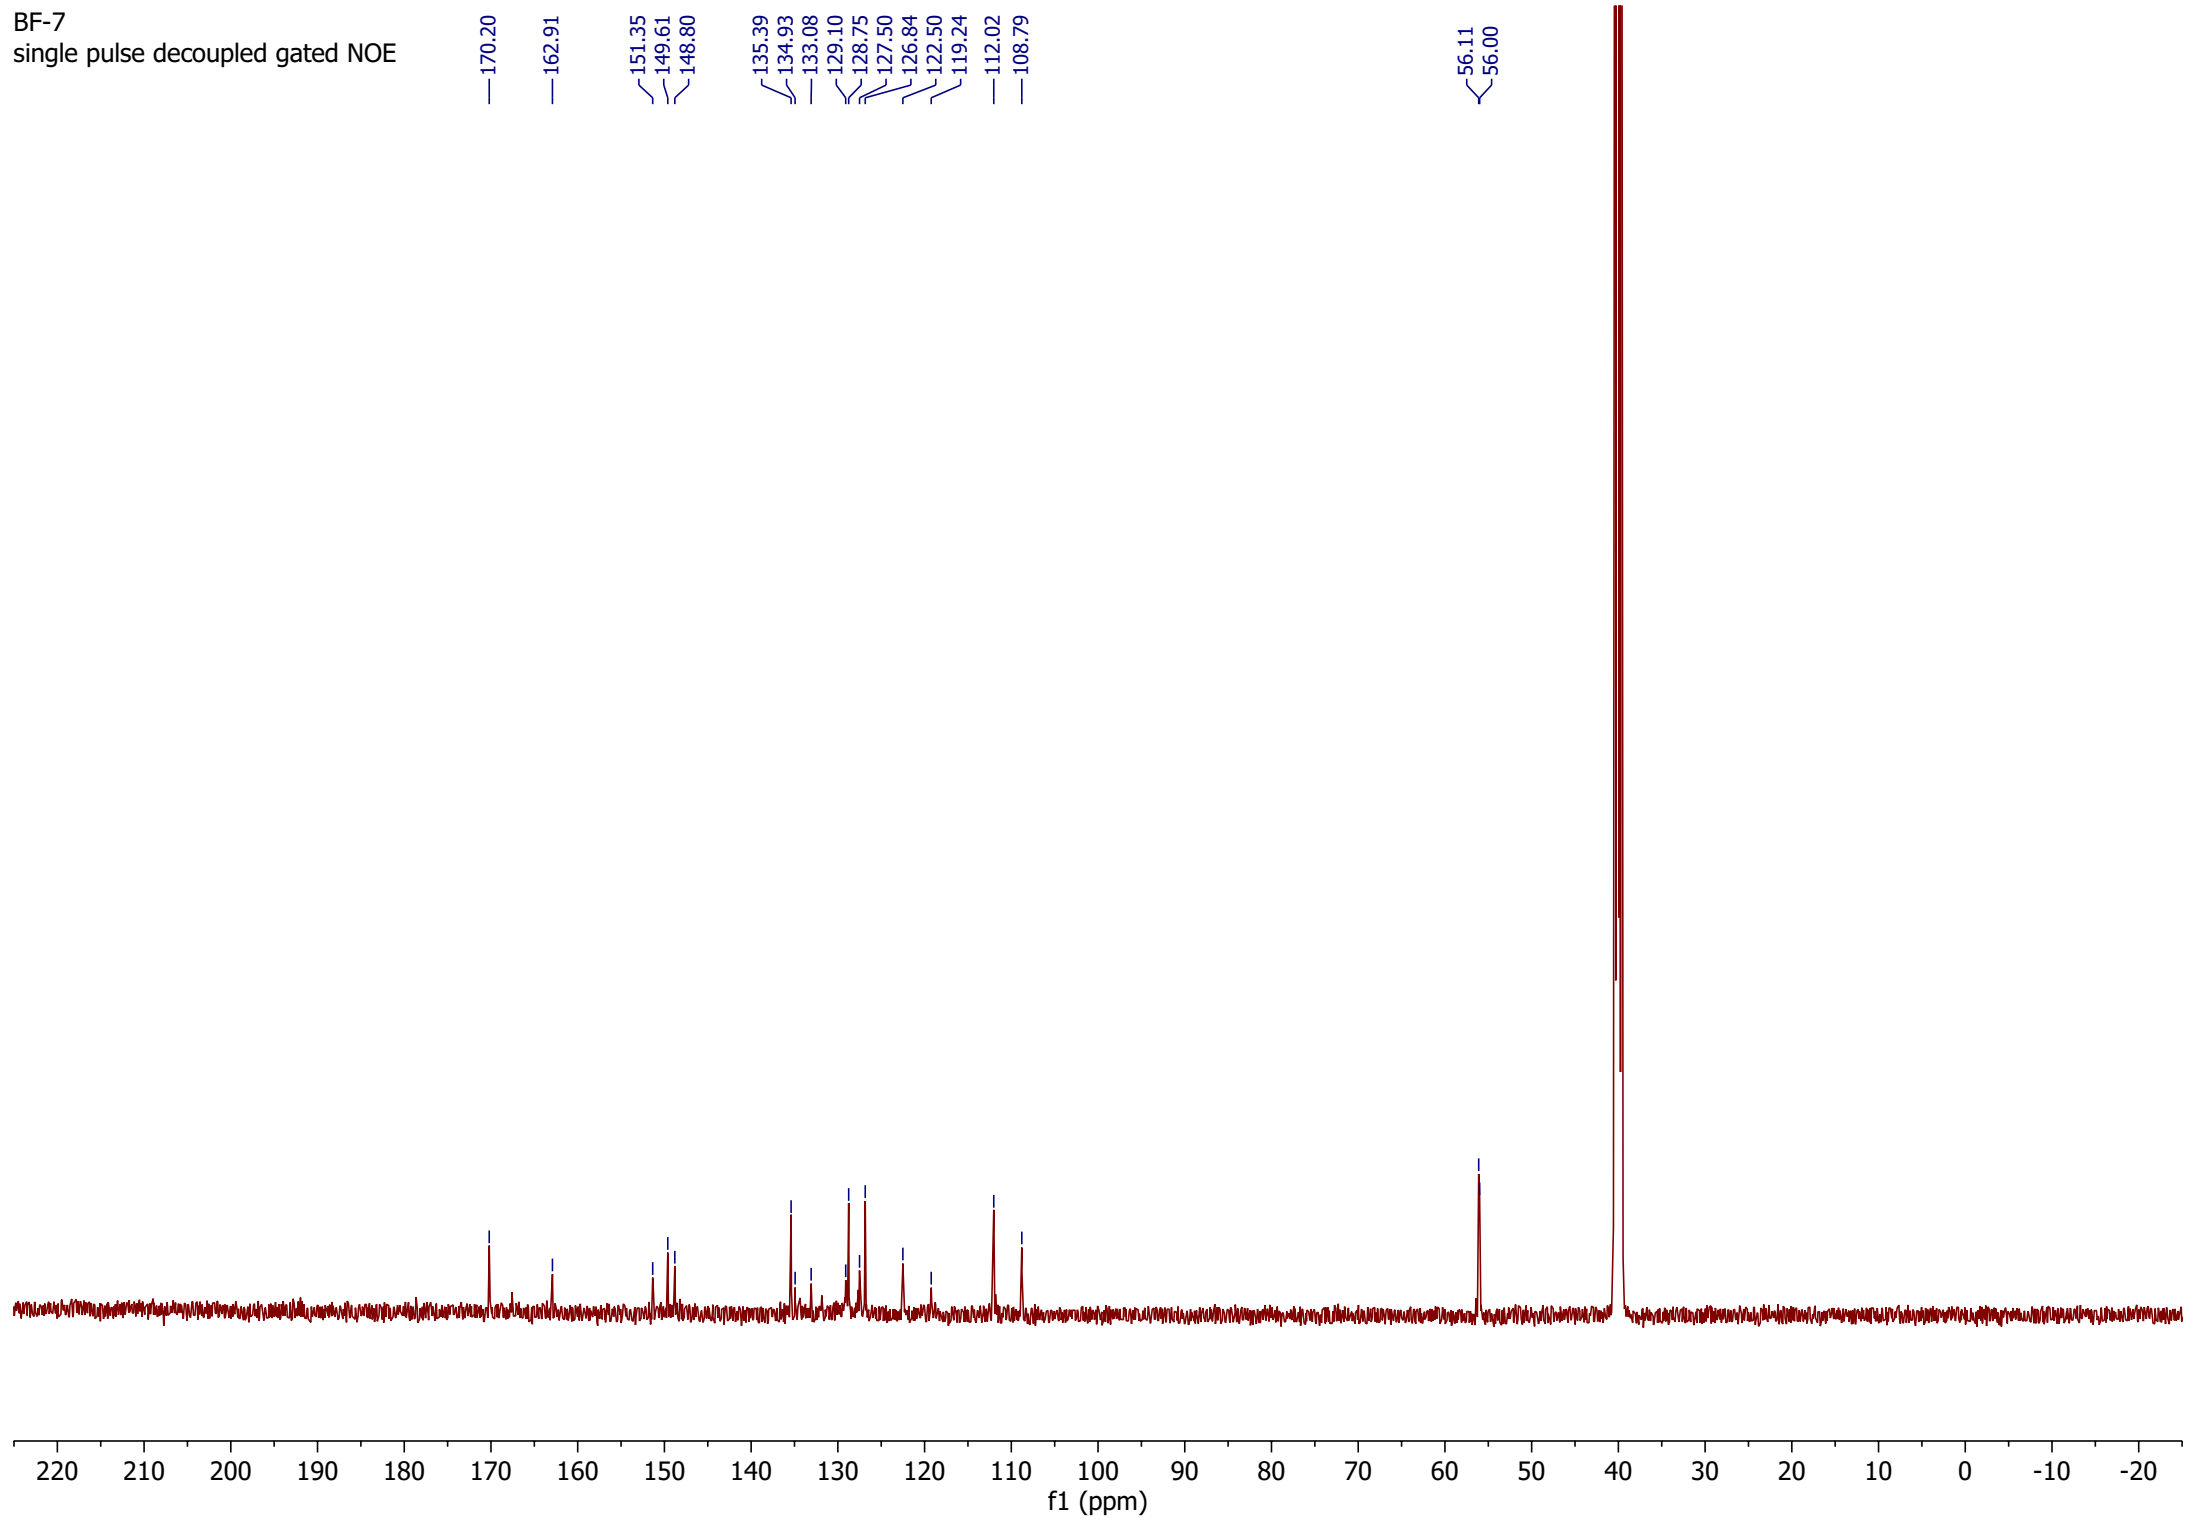

BF-9  
single pulse decoupled gated NOE

170.19  
167.58  
164.10  
163.13  
153.72  
148.08  
142.32  
139.69  
135.38  
131.88  
131.03  
130.43  
129.15  
128.81  
128.68  
126.88  
119.27

104.83

60.67  
56.49

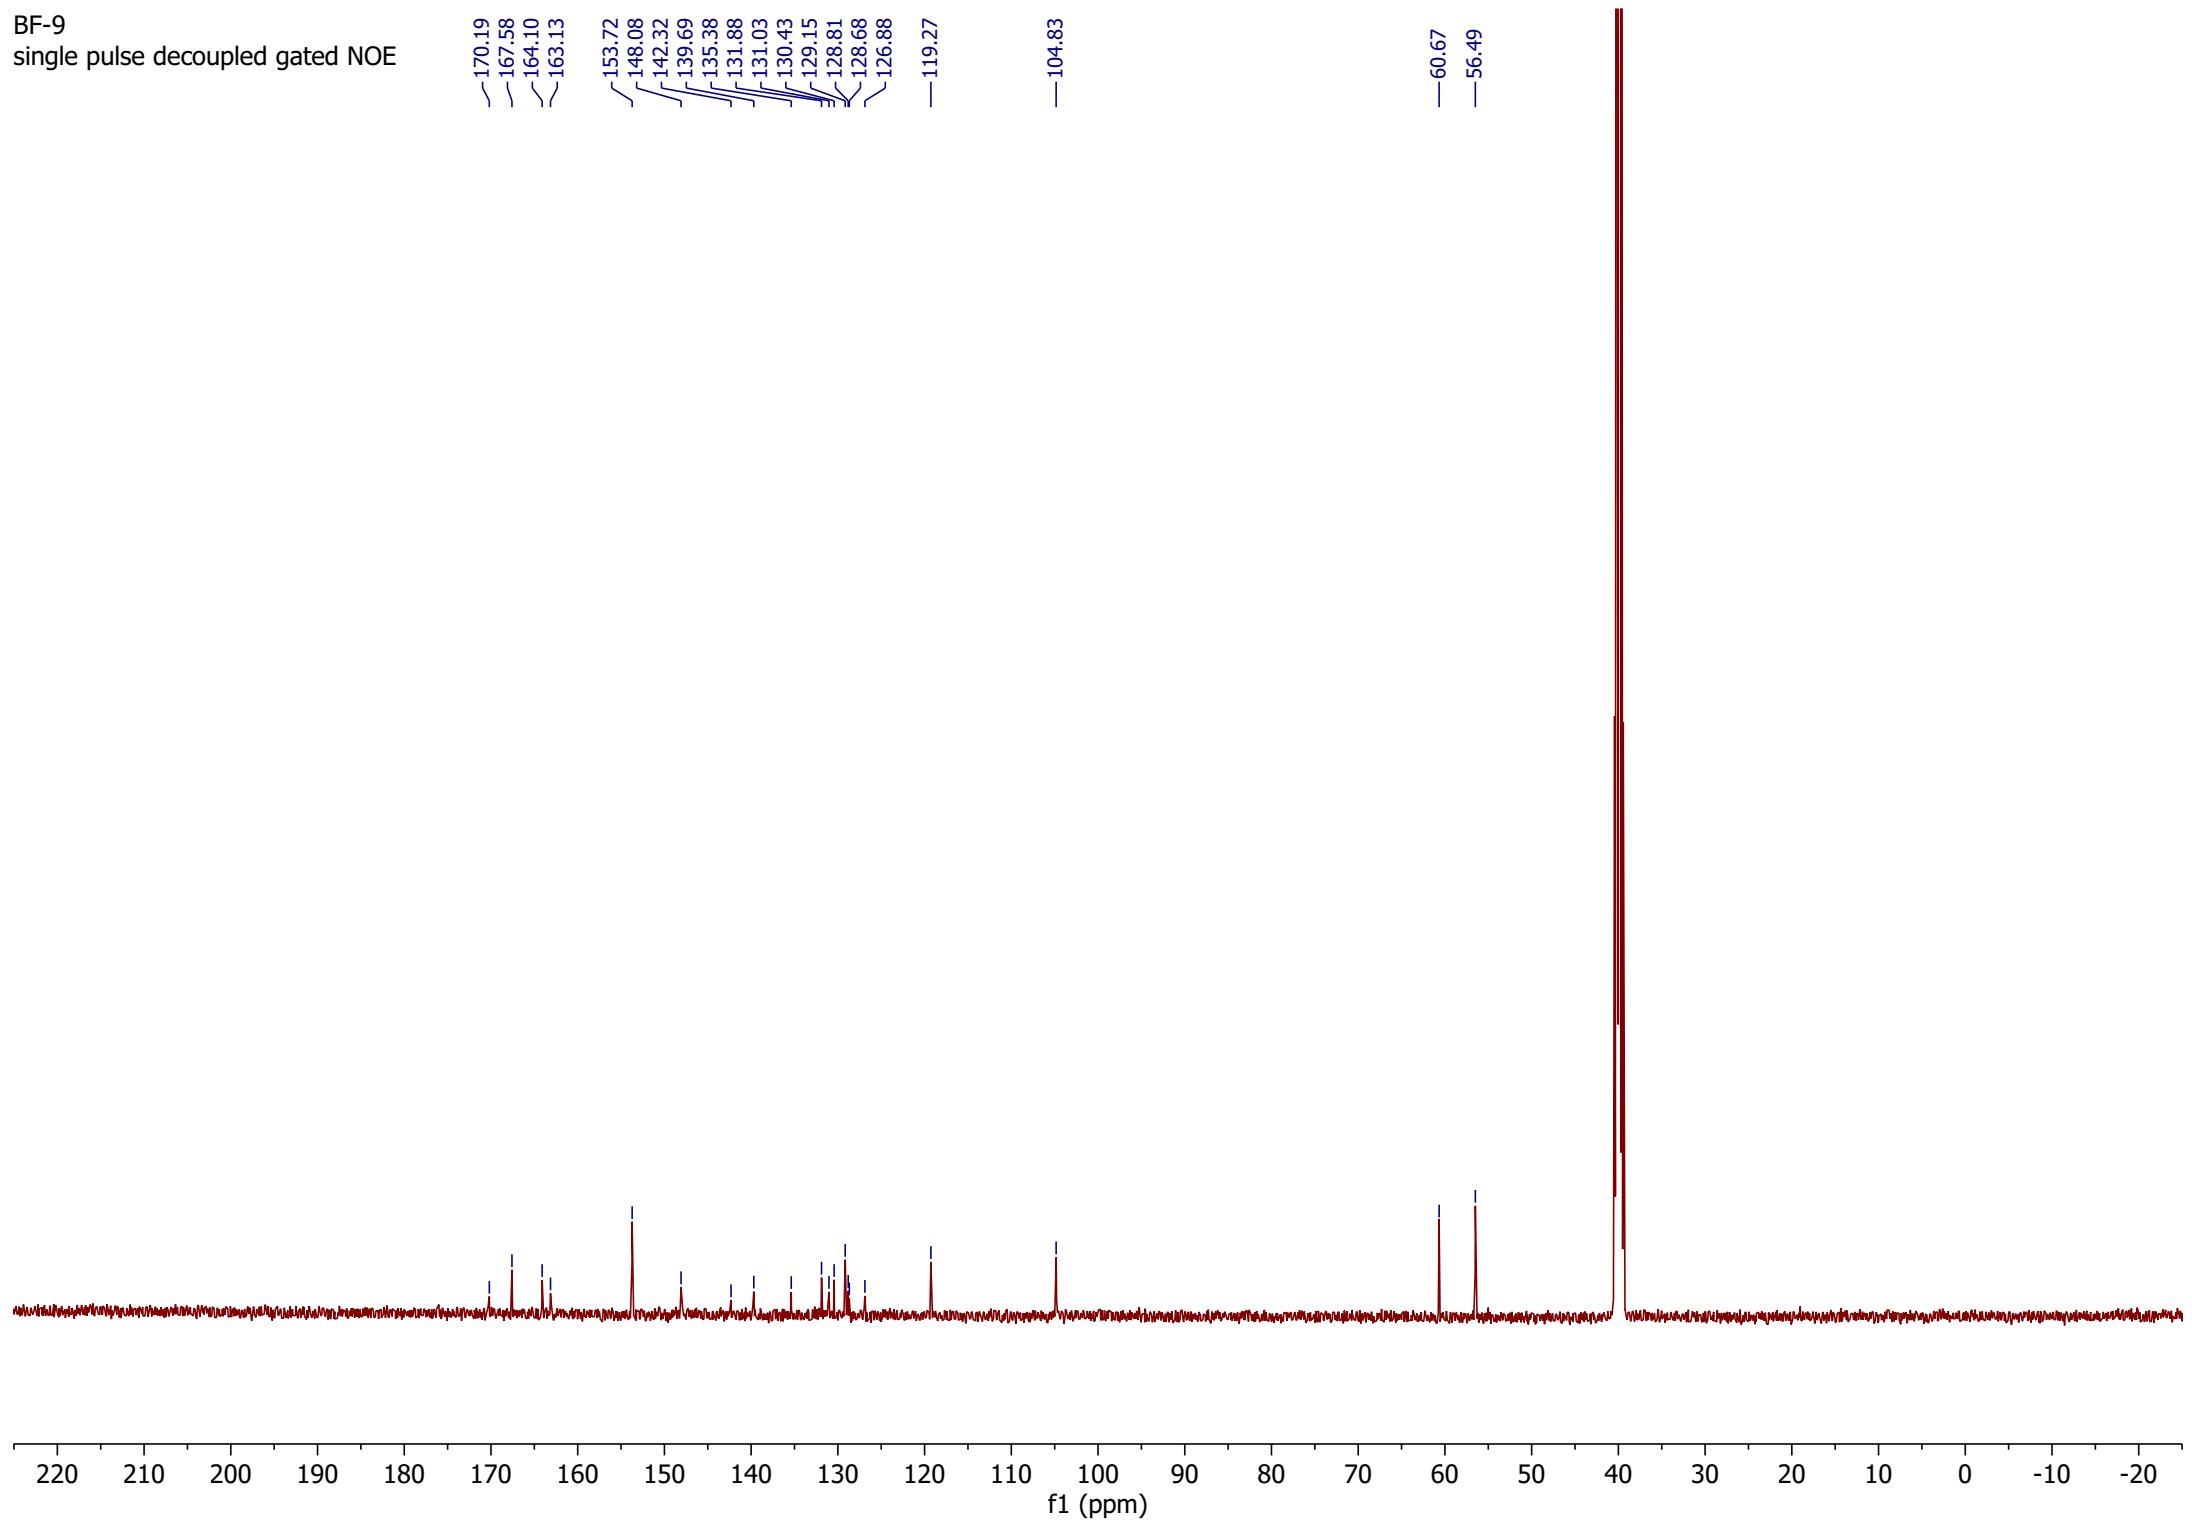

BF-10  
single pulse decoupled gated NOE

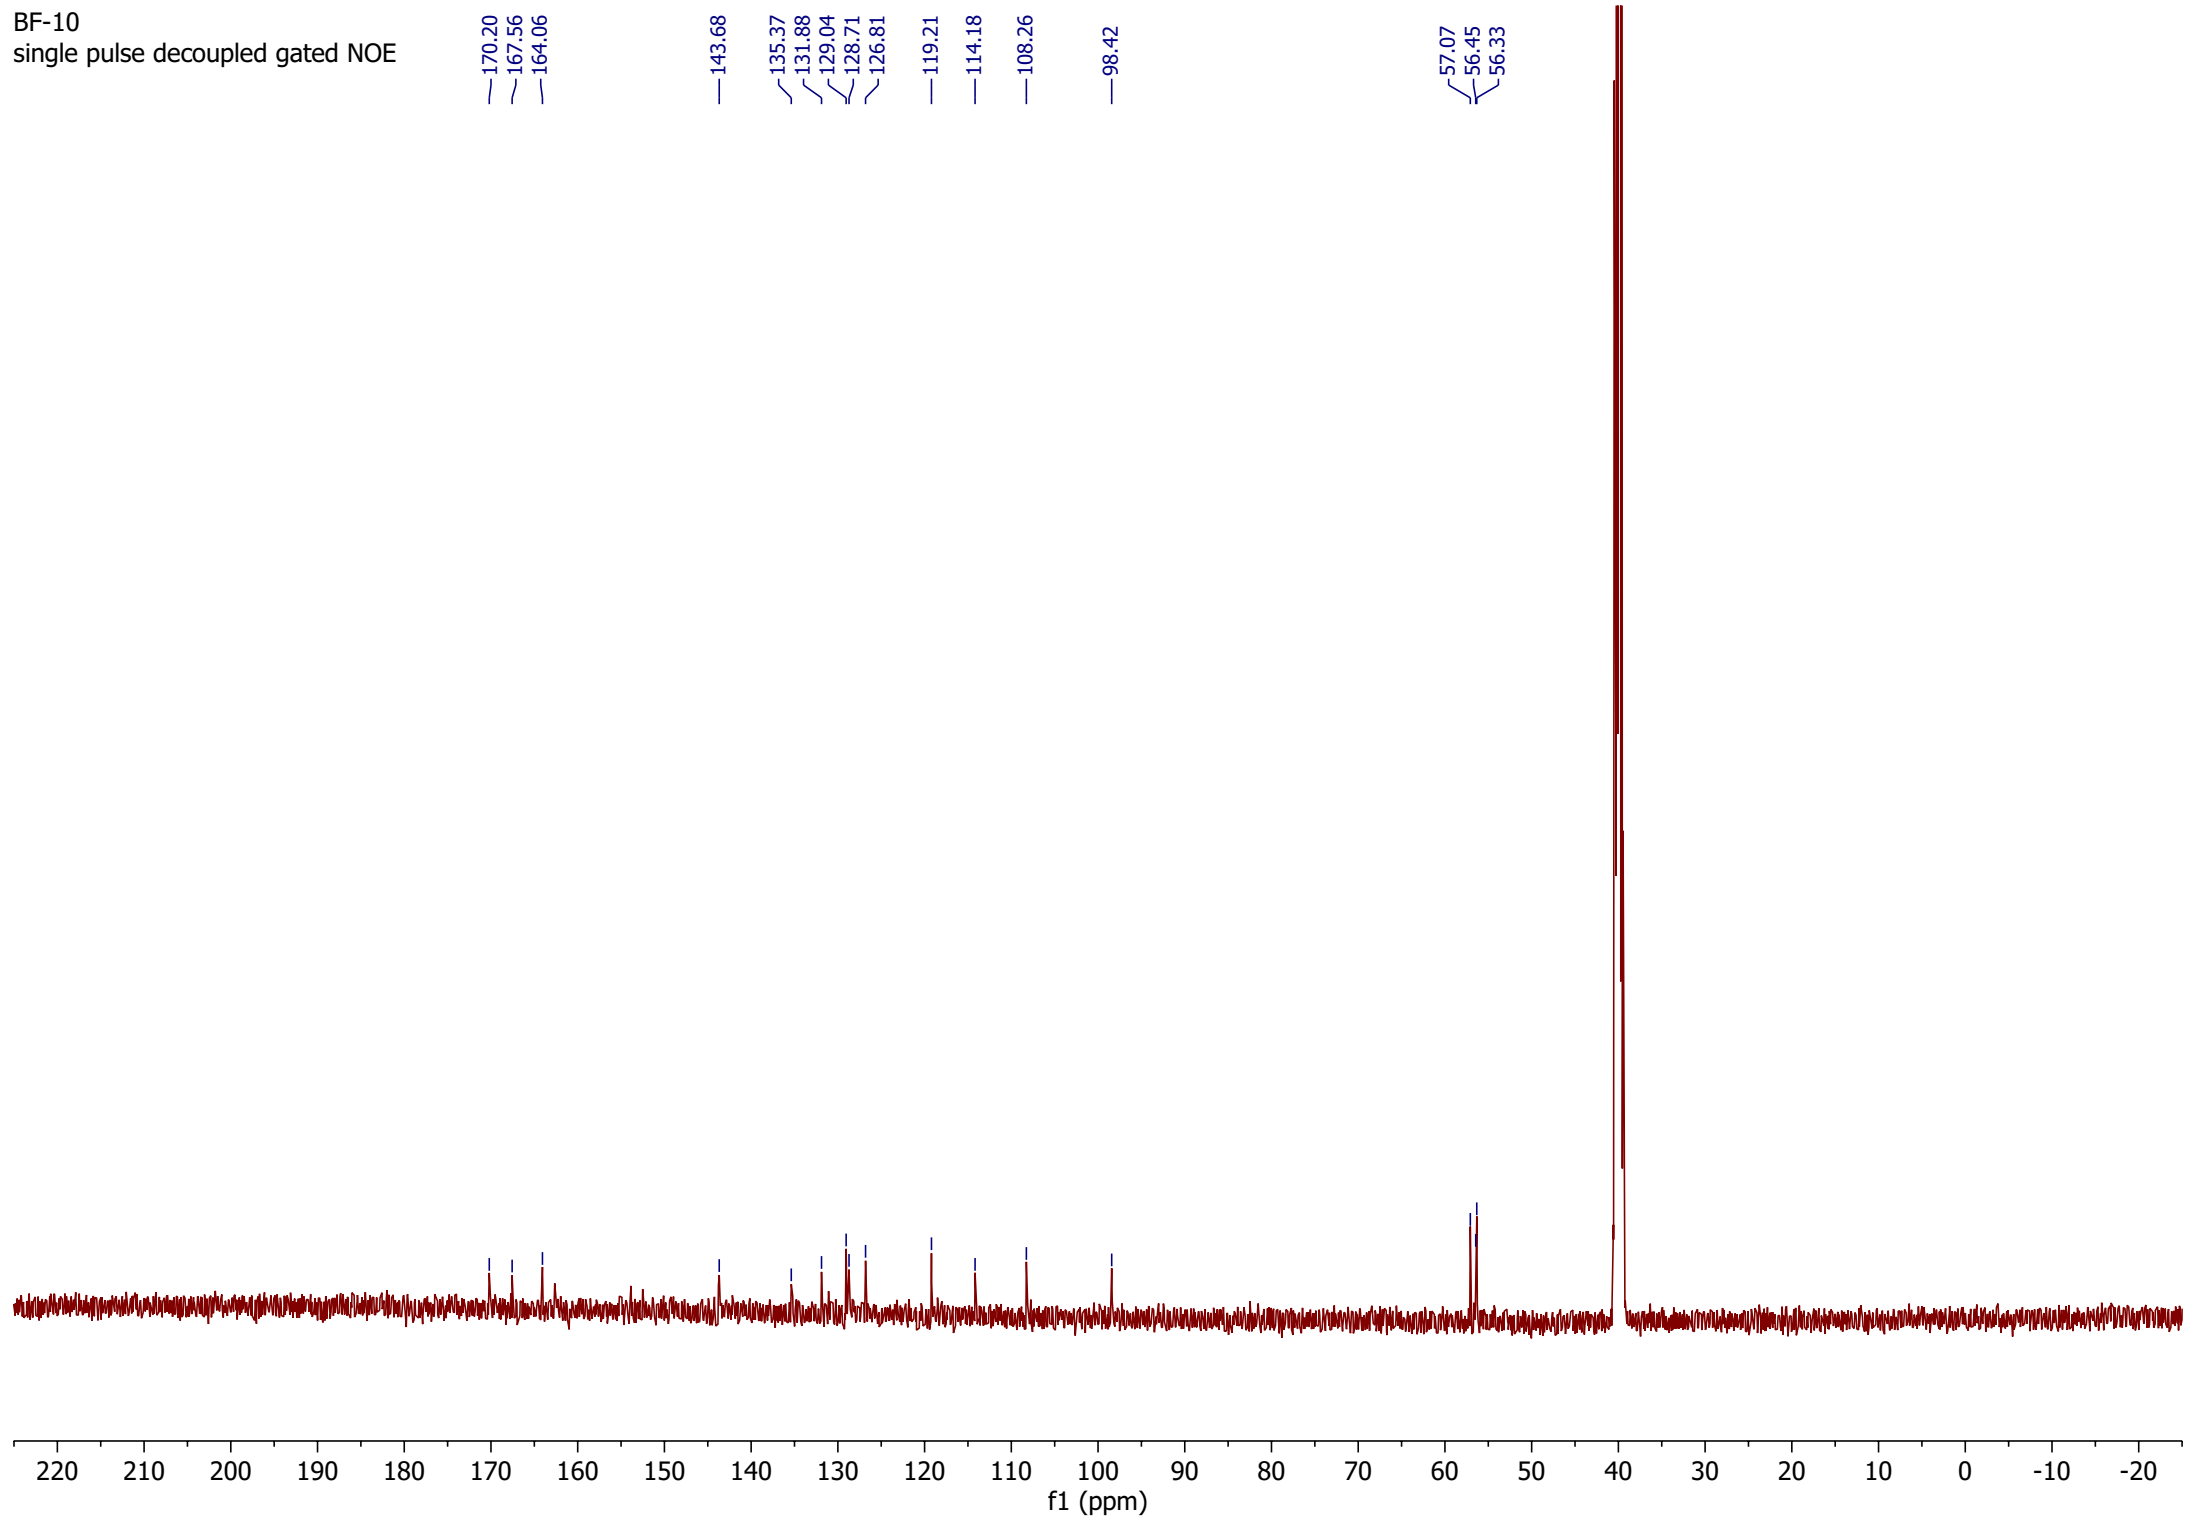

BF-11  
single pulse decoupled gated NOE

170.16  
167.62  
164.19  
162.90  
148.97  
148.61  
148.43  
147.61  
142.47  
135.32  
135.19  
132.23  
131.91  
130.93  
129.20  
128.84  
128.01  
126.90  
121.42  
121.28  
119.67  
119.36  
114.31  
113.30  
56.32

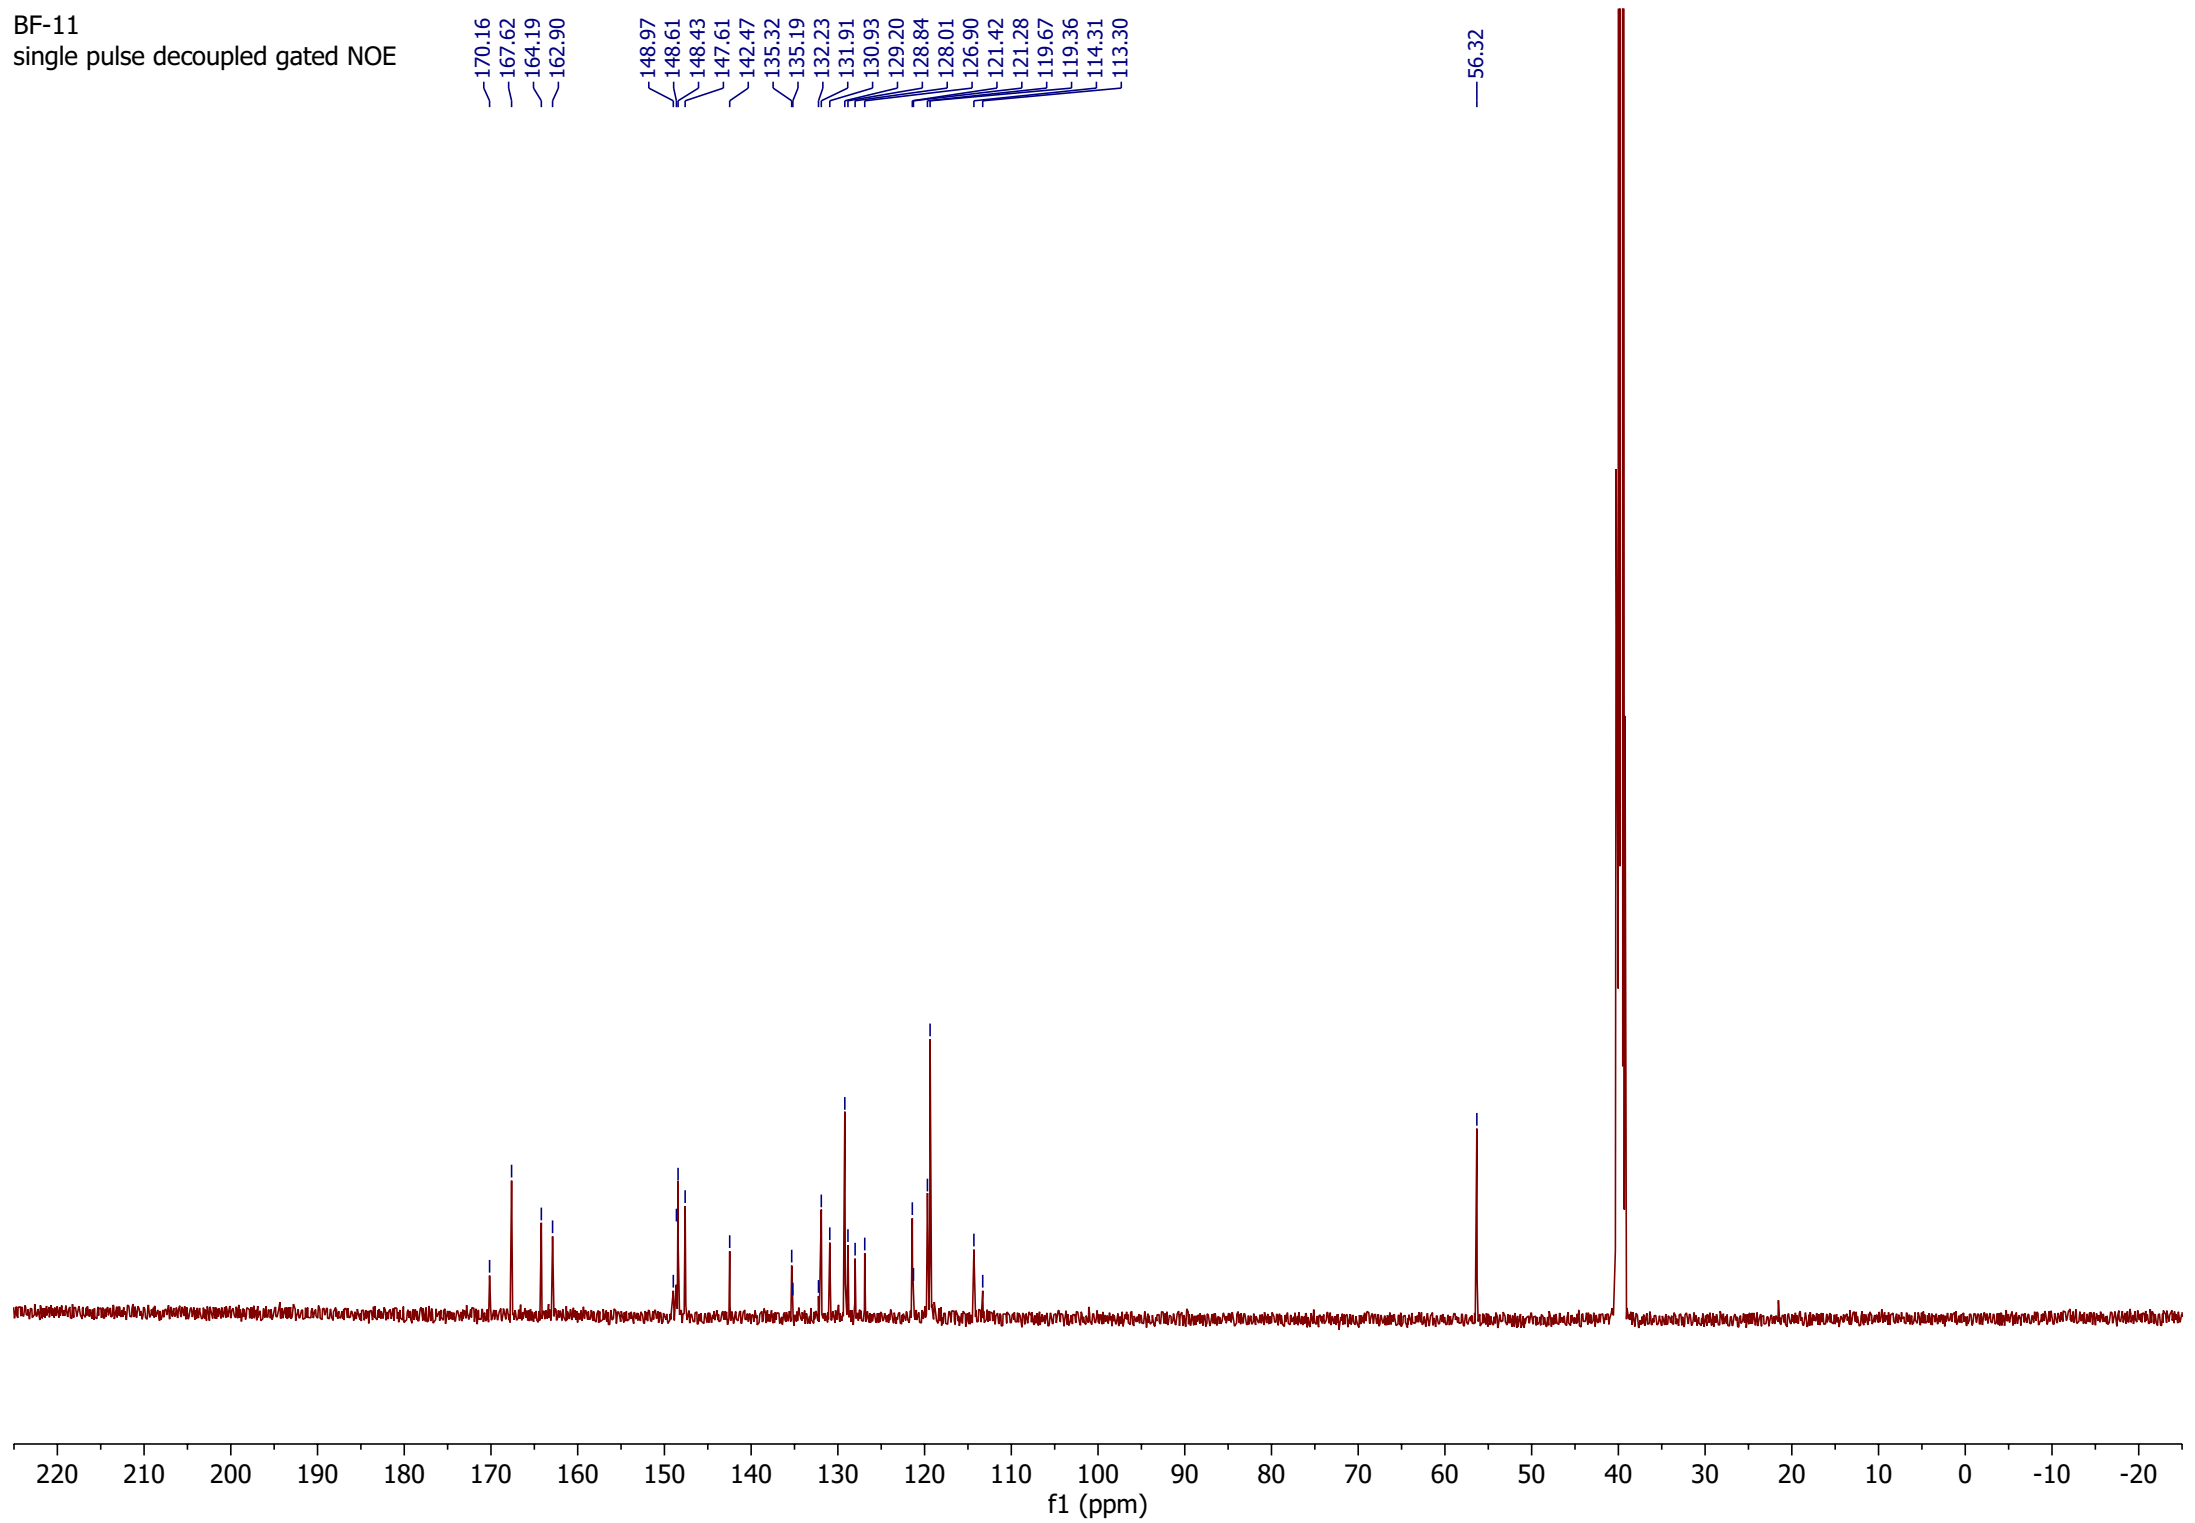

BF-12  
single pulse decoupled gated NOE

167.59  
164.09  
162.99  
148.78  
148.65  
142.19  
138.40  
131.89  
130.97  
129.08  
128.83  
125.14  
119.28  
105.16

56.56

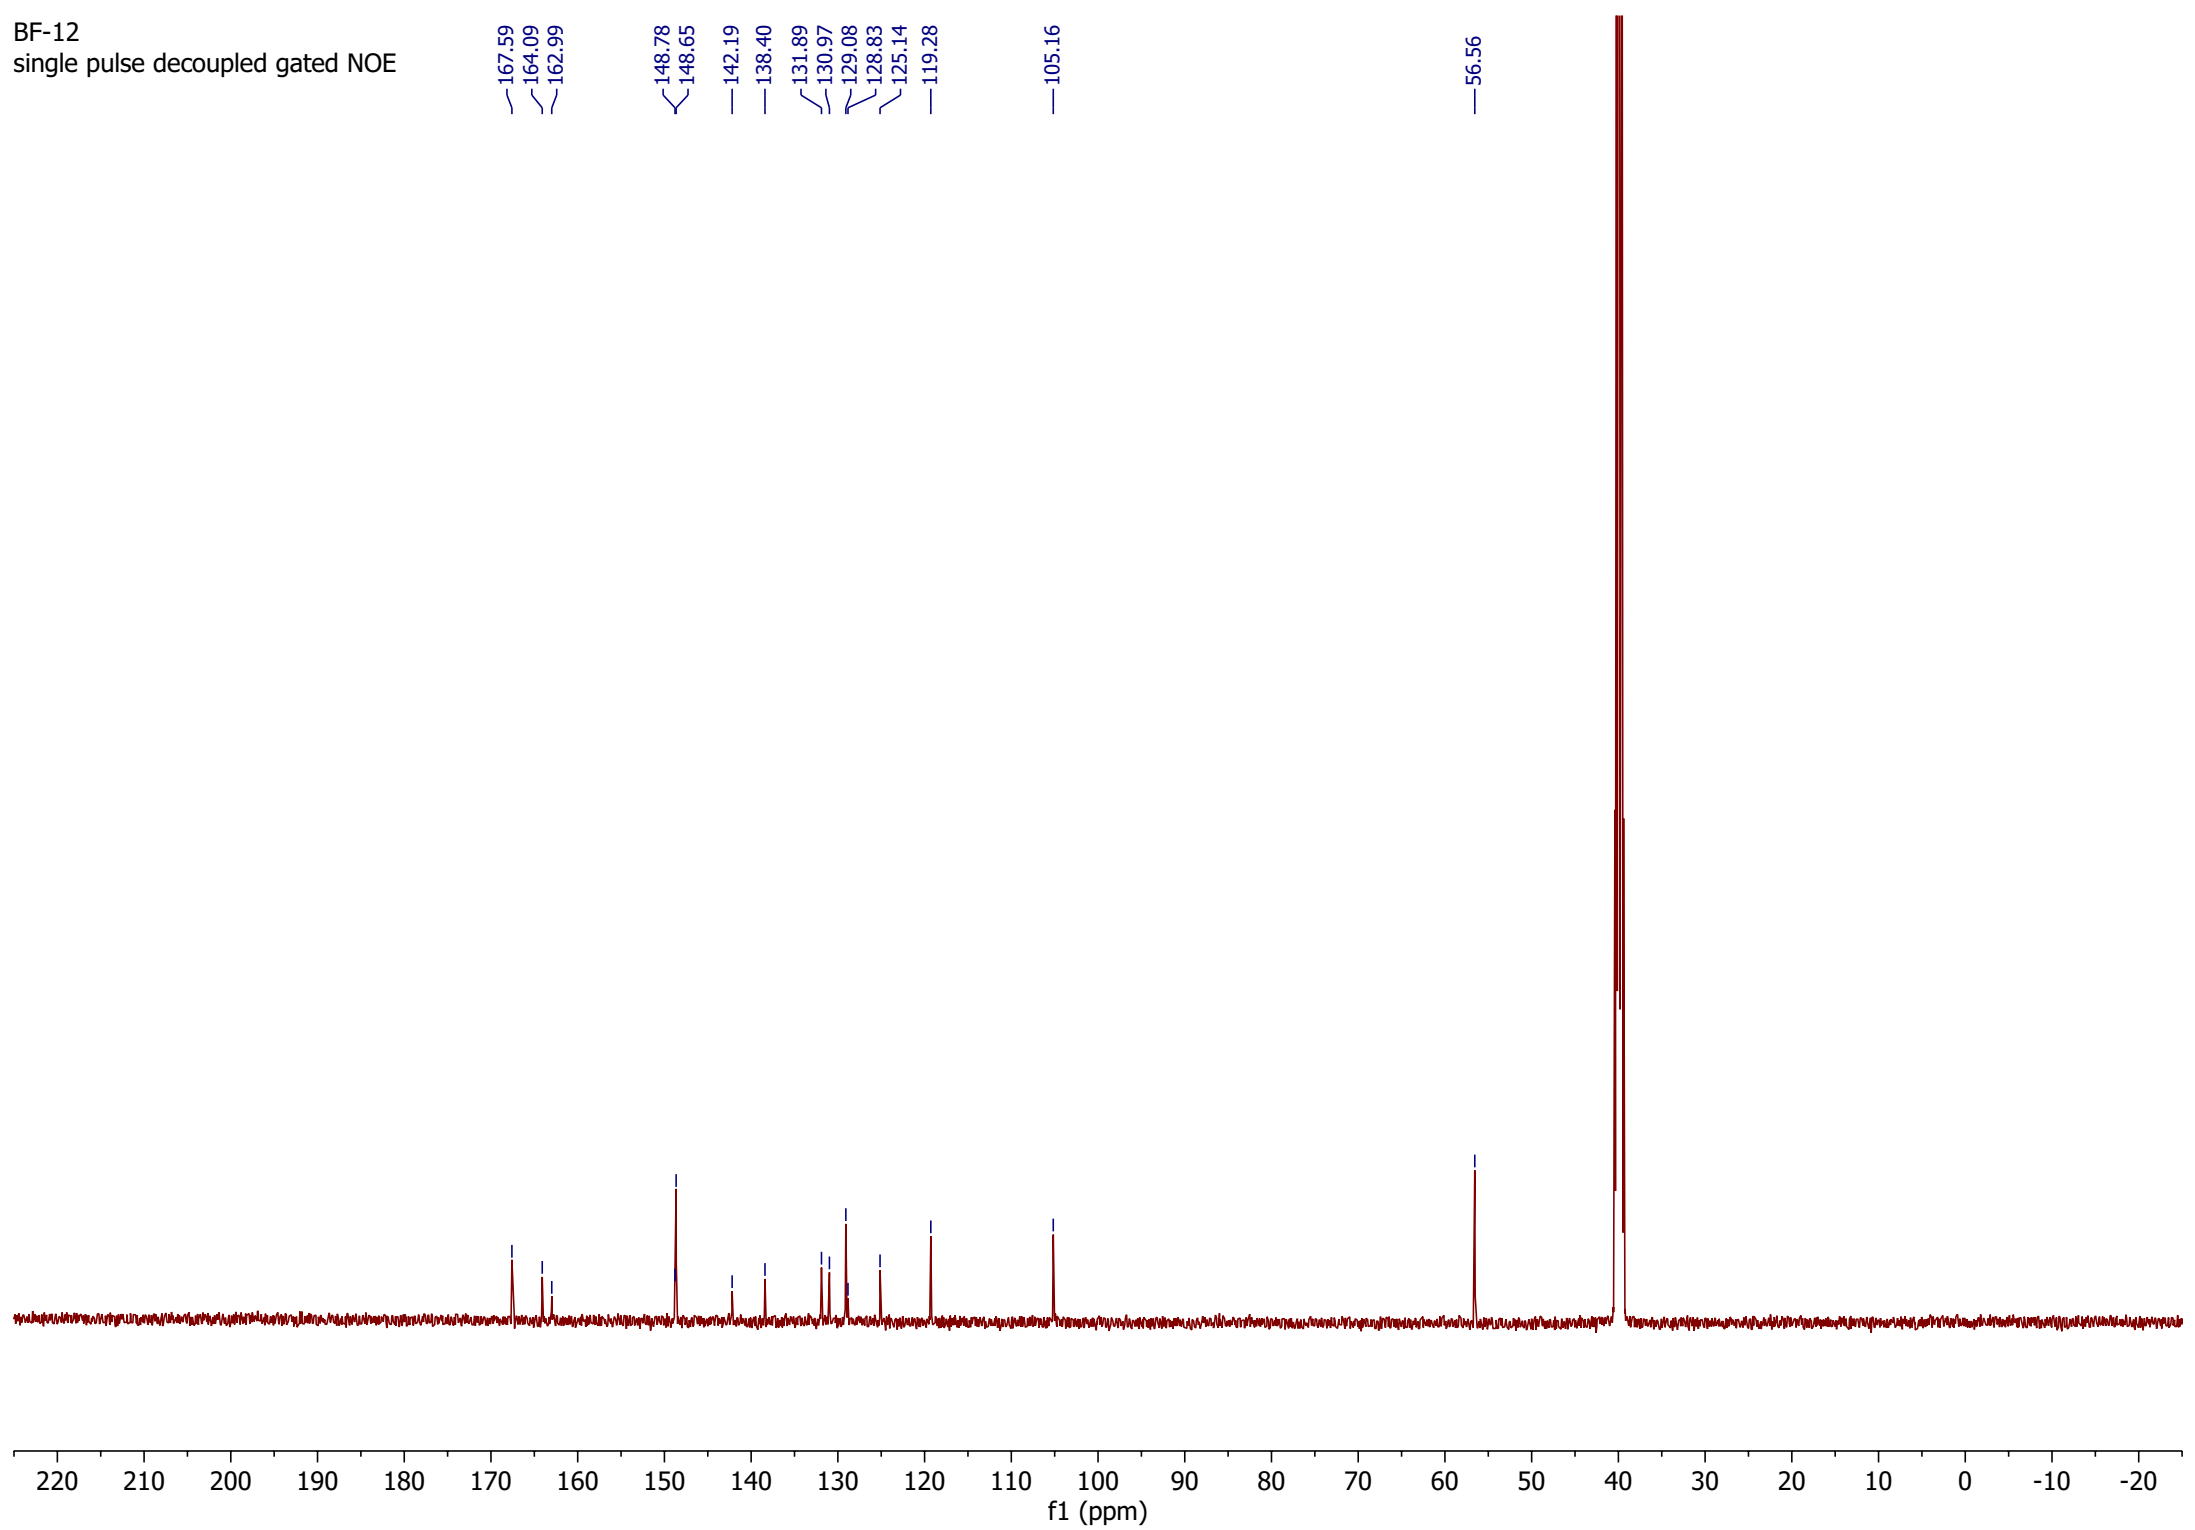

\*MSD1 SPC, time=2.430 of C:\CHEM32\1\DATA\11-02-2026\RM 2026-03-04 11-38-07\BF-1.D ES-API, Pos, Scan, Frag: 70

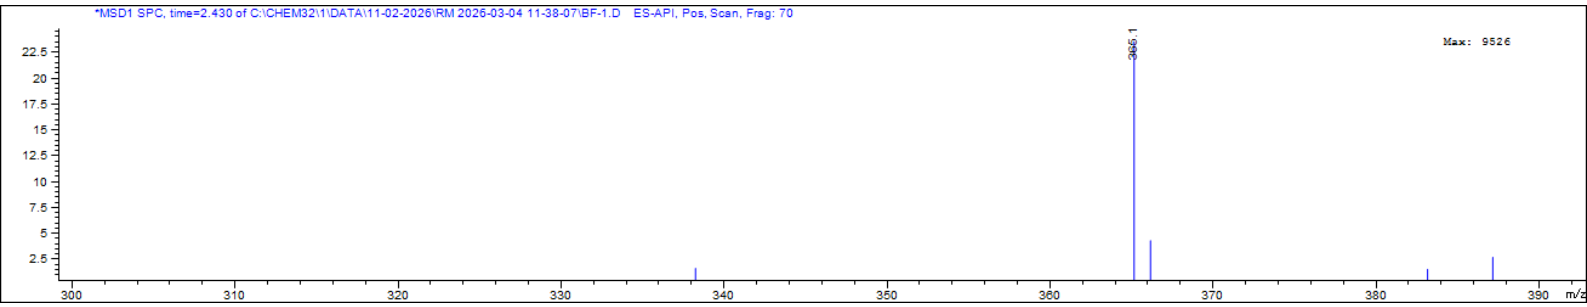

\*MSD1 SPC, time=0.604 of C:\CHEM32\1\DATA\11-02-2026\RM 2026-03-04 13-10-41\BF-2.D ES-API, Pos, Scan, Frag: 70

Max: 2232

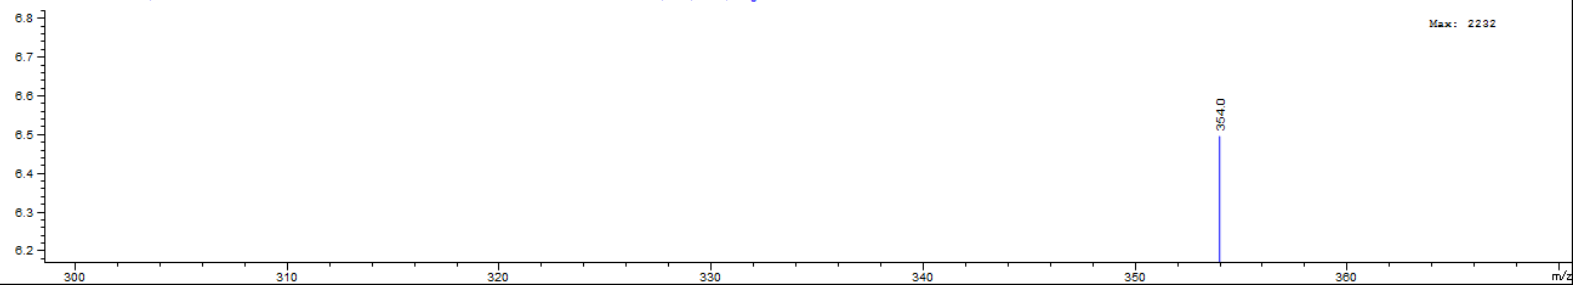

\*MSD1 SPC, time=0.951 of C:\CHEM32\1\DATA\11-02-2026\RM 2026-03-04 11-38-07\BF-3.D ES-API, Pos, Scan, Frag: 70

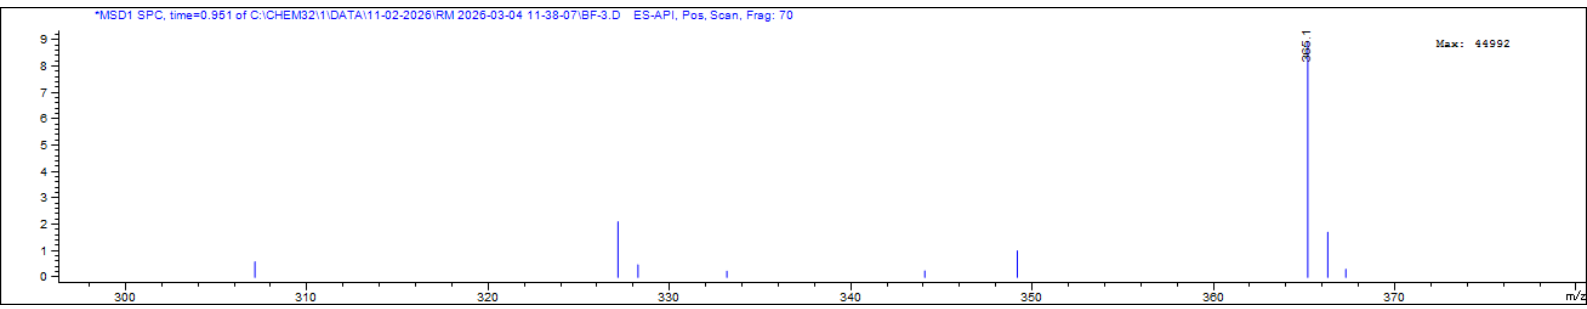

\*MSD1 SPC, time=1.331 of C:\CHEM32\1\DATA\11-02-2026\RM 2026-03-04 14-14-43\BF-5.D ES-API, Pos. Scan, Frag: 70

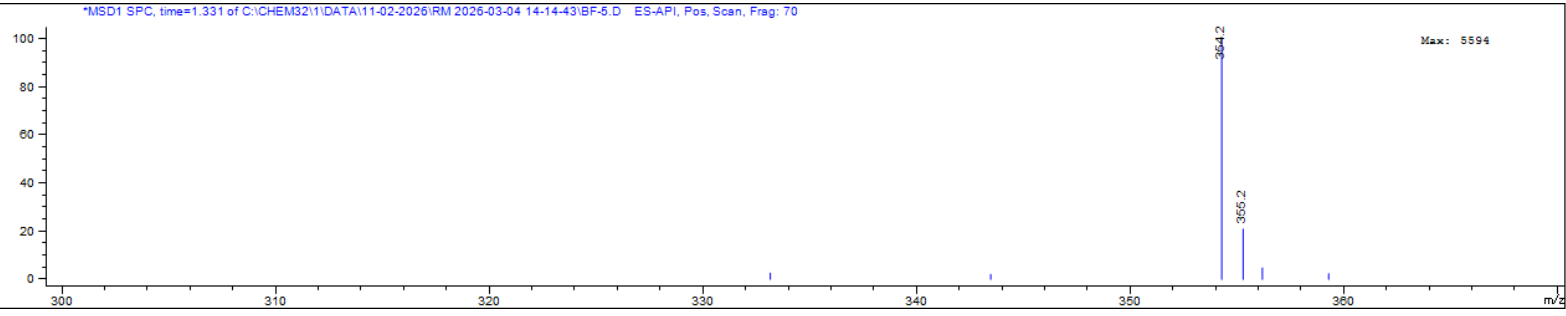

\*MSD1 SPC, time=1.002 of C:\CHEM32\1\DATA\11-02-2026\RM 2026-03-04 11-38-07\BF-6.D ES-API, Pos, Scan, Frag: 70

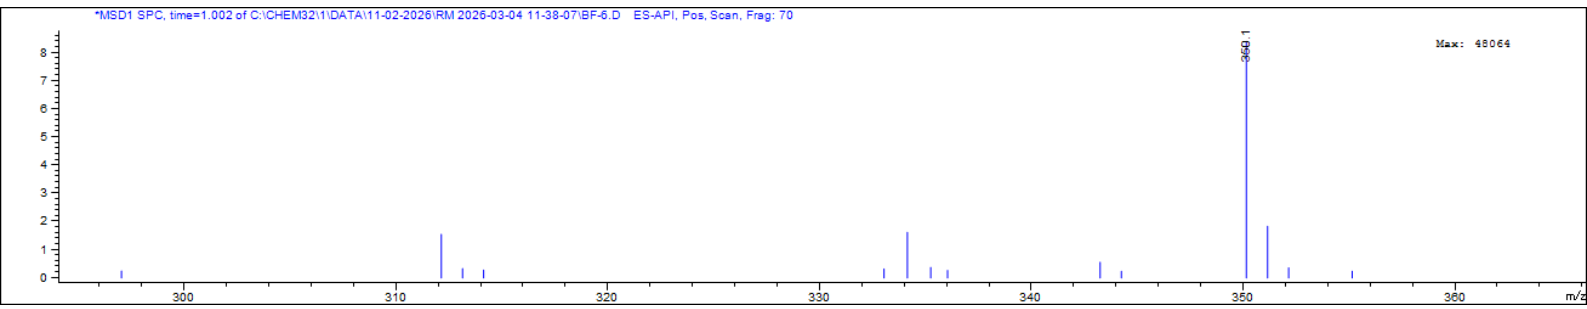

\*MSD1 SPC, time=1.937 of C:\CHEM32\1\DATA\11-02-2026\RM 2026-03-04 11-38-07\BF-7.D ES-API, Pos, Scan, Frag: 70

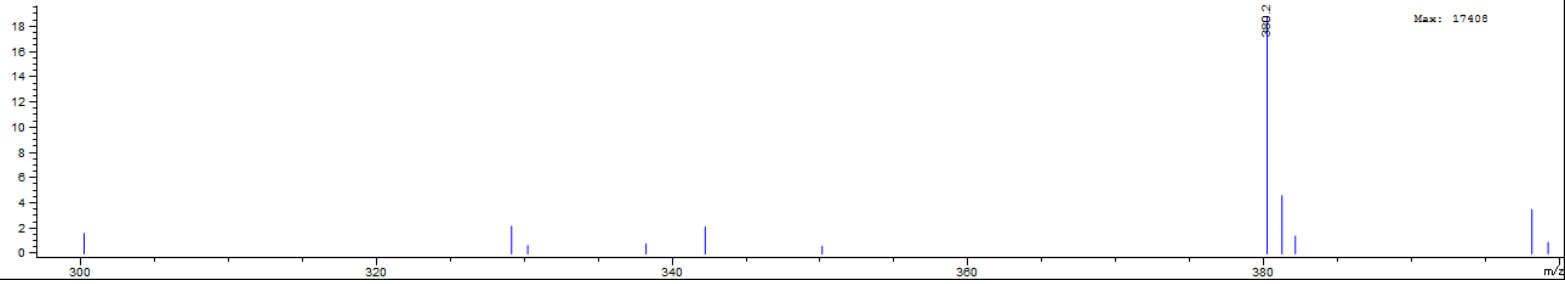

\*MSD1 SPC, time=2.940 of C:\CHEM32\1\DATA\11-02-2026\RM 2026-03-04 11-38-07\BF-8.D ES-API, Pos, Scan, Frag: 70

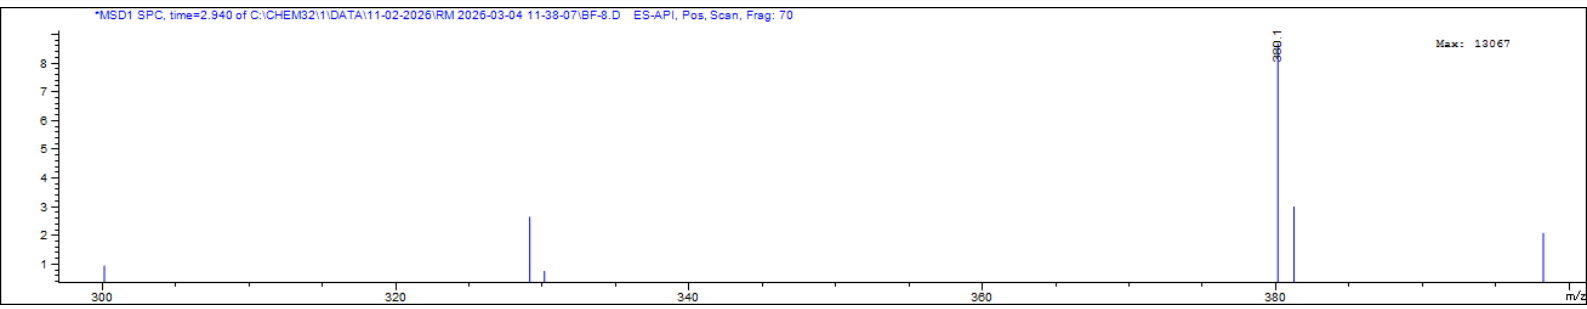

\*MSD1 SPC, time=1.894 of C:\CHEM32\1\DATA\11-02-2026\RM 2026-03-04 13-10-41\BF-9.D ES-API, Pos, Scan, Frag: 70

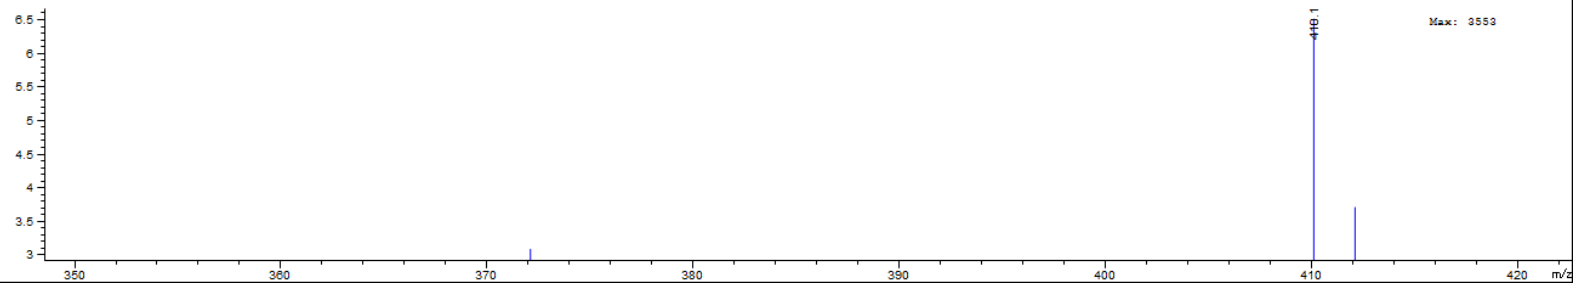

\*MSD1 SPC, time=2.629 of C:\CHEM32\1\DATA\11-02-2026\RM 2026-03-04 13-10-41\BF-10.D ES-API, Pos, Scan, Frag: 70

Max: 1566

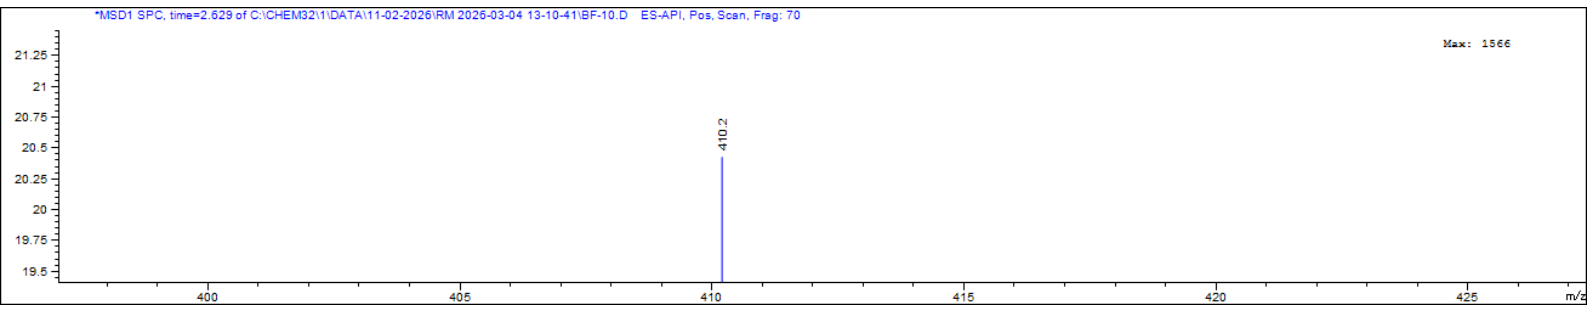

\*MSD1 SPC, time=1.496 of C:\CHEM32\1\DATA\11-02-2026\RM 2026-03-04 11-38-07\BF-11.D ES-API, Pos, Scan, Frag: 70

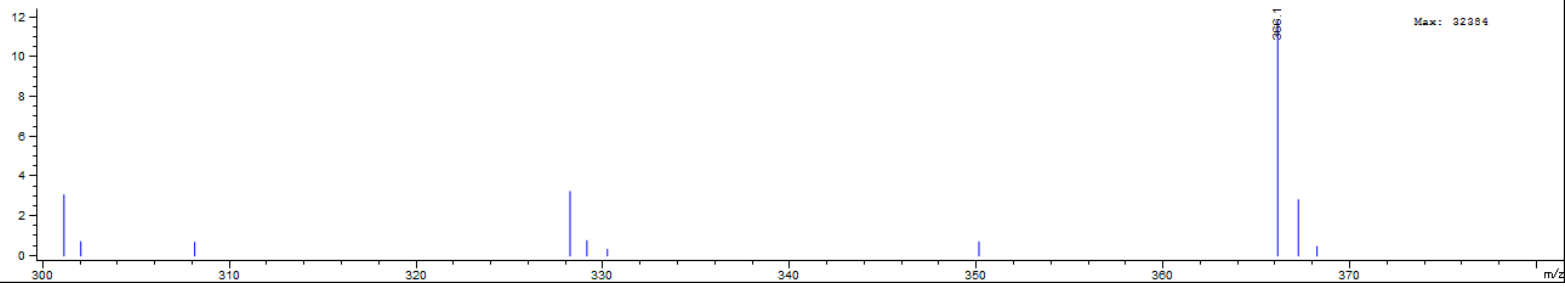

\*MSD1 SPC, time=2.548 of C:\CHEM32\1\DATA\11-02-2026\RM 2026-03-04 14-14-43\BF-12.D ES-API, Pos, Scan, Frag: 70

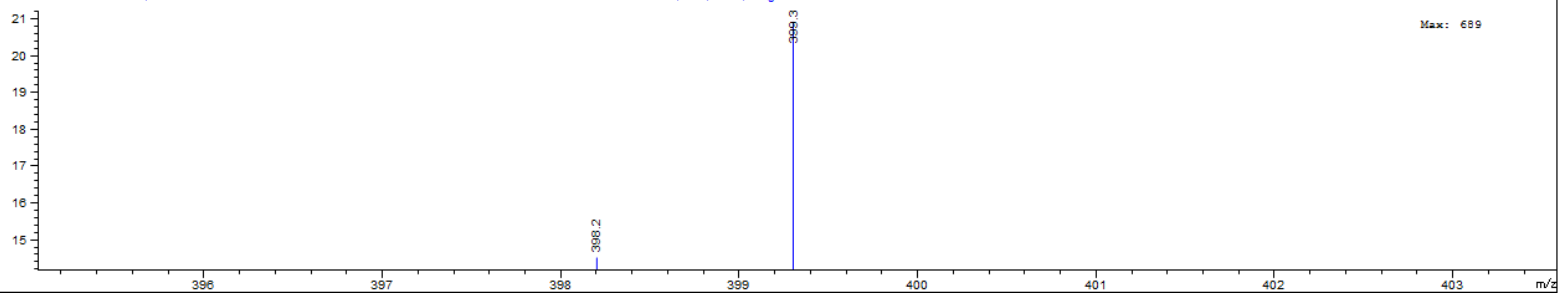

Supplement: d6nj00004e1.pdf [file d6nj00004e1.pdf]
